# Supplementary material for: Climatic factors shaping intraspecific leaf trait variation of a neotropical tree along a rainfall gradient
Source: PLoS One. 2018 Dec 6;13(12):e0208512. doi: 10.1371/journal.pone.0208512 (PMC6283565; doi:10.1371/journal.pone.0208512)
Supplement: S1 Table — (XLSX) [file pone.0208512.s001.xlsx]

## Sheet: Morphological traits
S1 Table: Data set of morphological traits of metamers in Copaifera langsdorffii.
Populations	Individuals	Light conditions	Leaves	LA (cm²)	PL (cm)	IL (cm)	SLA (cm²g-1)	LRAs (cm²g-1)	SPL (cm g-1)	SIL (cm²g-1)
LAV	L1	Shade	1	12.104	4.005	0.756	67.7716	59.3043	238.393	86.8966
LAV	L1	Shade	2	12.982	3.06	1.77	53.4019	45.3757	198.701	64.1304
LAV	L1	Shade	3	23.618	4.811	0.8	72.05	65.0275	203.856	67.7966
LAV	L1	Shade	4	20.985	4.724	1.362	62.0491	53.7388	185.984	50.632
LAV	L1	Shade	5	14.318	4.704	0.758	73.2004	63.354	247.579	66.4912
LAV	L1	Shade	6	18.951	4.734	1.278	67.226	58.4006	208.546	64.2211
LAV	L1	Shade	7	14.125	4.253	1.259	70.5192	60.805	260.92	80.1911
LAV	L1	Shade	8	17.107	4.754	1.398	67.0074	56.7773	190.16	66.5714
LAV	L1	Shade	9	19.143	4.98	0.817	69.409	61.0233	207.5	58.777
LAV	L1	Shade	10	21.443	5.098	1.259	74.4032	63.9136	186.058	63.2663
LAV	L1	Shade	11	20.872	5.223	0.958	82.4329	72.2465	225.129	76.64
LAV	L1	Sun	1	19.529	4.286	1.015	58.911	51.9112	163.588	54.8649
LAV	L1	Sun	2	14.865	4.449	1.152	55.5078	47.4163	205.972	47.8008
LAV	L1	Sun	3	20.722	4.83	0.721	60.6261	54.2745	162.626	70
LAV	L1	Sun	4	14.472	4.452	0.78	63.3625	55.5334	228.308	61.4173
LAV	L1	Sun	5	8.754	2.777	1	67.5463	56.4774	237.35	72.9927
LAV	L1	Sun	6	14.405	3.982	0.642	68.6606	61.4286	256.903	69.7826
LAV	L1	Sun	7	17.155	4.98	1.549	60.4901	52.0637	200.806	73.4123
LAV	L1	Sun	8	15.042	4.76	1.165	51.6375	46.4116	250.526	84.4203
LAV	L1	Sun	9	22.261	4.744	0.819	70.3571	62.9553	197.667	62.0455
LAV	L1	Sun	10	20.433	5.001	1.127	62.031	52.6352	170.102	38.3333
LAV	L1	Sun	11	17.71	4.691	0.964	61.0059	54.242	190.691	83.1034
LAV	L2	Shade	1	15.084	2.973	2.111	50.465	41.5996	86.1739	72.2945
LAV	L2	Shade	2	17.672	4.799	1.334	72.4856	58.8282	280.643	33.7722
LAV	L2	Shade	3	24.174	6.882	1.103	103.662	88.1298	299.217	60.9392
LAV	L2	Shade	4	24.458	4.341	2.658	97.0556	83.8464	155.591	225.254
LAV	L2	Shade	5	29.621	7.918	3.541	82.0981	67.1069	268.407	69.2955
LAV	L2	Shade	6	20.039	5.784	1.175	52.4444	41.9051	133.889	22.2117
LAV	L2	Shade	7	31.097	5.68	3.172	146.892	127.866	266.667	310.98
LAV	L2	Shade	8	18.747	4.323	3.155	41.494	31.5553	101.005	31.7085
LAV	L2	Shade	9	21.739	4.328	2.946	73.8919	58.0636	181.088	52.3268
LAV	L2	Shade	10	22.501	5.167	0.969	68.958	52.1218	169.967	12.92
LAV	L2	Shade	11	12.594	4.155	2.021	52.4313	45.3511	170.287	154.275
LAV	L2	Sun	1	13.667	5.736	0.824	71.9695	57.28	228.526	34.9153
LAV	L2	Sun	2	17.143	5.134	0.874	64.086	53.2391	212.149	28.8449
LAV	L2	Sun	3	18.308	6.204	1.732	73.4082	63.2401	289.907	92.6203
LAV	L2	Sun	4	12.666	4.535	1.343	94.171	46.0582	45.7157	32.5182
LAV	L2	Sun	5	13.741	3.462	1.728	83.3799	71.16	181.257	187.826
LAV	L2	Sun	6	16.195	6.772	1.276	73.4134	58.6775	284.538	40.3797
LAV	L2	Sun	7	15.71	5.406	1.071	84.7814	71.9652	386.143	56.3684
LAV	L2	Sun	8	15.71	4.984	2.37	63.3723	53.783	202.602	120.918
LAV	L2	Sun	9	17.672	4.799	1.334	72.4856	58.8282	280.643	33.7722
LAV	L2	Sun	10	16.687	5.369	1.813	130.981	102.186	344.167	89.3103
LAV	L2	Sun	11	20.147	6.605	1.908	76.3144	61.5551	261.067	50.2105
LAV	L3	Shade	1	23.61	5.332	0.926	62.4273	53.5982	119.552	52.3164
LAV	L3	Shade	2	24.19	5.07	1.095	59.5373	50.4484	122.169	34.5426
LAV	L3	Shade	3	14.403	4.295	0.838	70.7417	60.1629	169.763	79.8095
LAV	L3	Shade	4	19.783	5.032	1.518	59.1067	48.9073	124.247	51.8089
LAV	L3	Shade	5	20.659	4.978	1.537	65.814	54.7403	144.709	52.8179
LAV	L3	Shade	6	17.425	5.33	1.35	63.4098	52.1238	139.164	63.6792
LAV	L3	Shade	7	19.733	5.13	0.974	74.6331	64.089	167.647	75.5039
LAV	L3	Shade	8	22.004	4.884	0.796	66.2971	57.7836	141.565	55.2778
LAV	L3	Shade	9	34.331	5.682	0.93	74.39	64.8489	114.326	51.0989
LAV	L3	Shade	10	28.454	6.932	1.136	67.5867	57.2861	132.797	48.3404
LAV	L3	Shade	11	22.209	4.699	0.716	74.5268	64.5423	149.65	48.7075
LAV	L3	Sun	1	20.834	6.079	1.692	158.433	126.727	357.588	106.415
LAV	L3	Sun	2	17.841	5.687	1.443	55.8404	48.1279	185.85	70.0485
LAV	L3	Sun	3	17.193	5.092	1.289	65.9494	56.1312	191.429	67.8421
LAV	L3	Sun	4	18.607	6.629	0.967	64.2507	55.6929	217.344	69.0714
LAV	L3	Sun	5	19.42	5.413	1.511	76.2765	66.3932	228.397	106.408
LAV	L3	Sun	6	17.051	5.631	1.401	73.75	62.8029	225.24	91.5686
LAV	L3	Sun	7	22.218	6.516	1.827	72.6791	59.7419	180	60.9
LAV	L3	Sun	8	14.586	5.475	1.407	74.003	63.5002	248.864	132.736
LAV	L3	Sun	9	24.997	7.492	1.396	69.0144	60.0745	205.26	80.2299
LAV	L3	Sun	10	26.2	8.943	0.831	79.3699	66.9905	205.115	47.7586
LAV	L3	Sun	11	18.24	6.3	1.709	82.3476	68.8562	232.472	104.847
LAV	L4	Shade	1	13.438	4.445	1.562	36.4272	30.3752	114.858	44.8851
LAV	L4	Shade	2	10.118	3.957	1.613	62.0736	47.0386	190.24	51.5335
LAV	L4	Shade	3	8.823	3.861	1.048	51.5362	40.5282	257.4	33.2698
LAV	L4	Shade	4	12.867	4.825	1.351	112.376	91.6453	360.075	108.08
LAV	L4	Shade	5	9.25	4.246	0.998	53.7478	44.0476	193	62.7673
LAV	L4	Shade	6	15.68	4.841	1.792	135.875	107.618	340.915	111.304
LAV	L4	Shade	7	13.319	5.669	1.224	59.0381	47.5169	226.76	41.2121
LAV	L4	Shade	8	10.96	4.094	1.706	56.0901	45.5339	183.587	74.1739
LAV	L4	Shade	9	12.659	4.39	1.467	76.9544	59.099	302.759	41.6761
LAV	L4	Shade	10	10.202	4.26	1.261	58.6322	46.5207	244.828	45.1971
LAV	L4	Shade	11	14.714	4.588	0.36	123.44	97.1863	334.891	19.4595
LAV	L4	Sun	1	7.084	3.777	1.111	33.4309	26.8435	152.298	40.8456
LAV	L4	Sun	2	5.45	2.799	1.517	40.7324	31.5942	195.734	62.1721
LAV	L4	Sun	3	9.791	4.144	1.138	80.0572	52.9816	328.889	22.8056
LAV	L4	Sun	4	10.341	3.885	1.386	67.456	56.9438	242.812	112.683
LAV	L4	Sun	5	6.987	1.992	1.54	38.5809	31.4164	123.727	61.1111
LAV	L4	Sun	6	12.666	4.535	1.343	94.171	46.0582	45.7157	32.5182
LAV	L4	Sun	7	7.889	3.64	1.347	41.0672	33.902	204.494	59.0789
LAV	L4	Sun	8	14.596	4.694	1.495	97.0479	75.6269	352.932	51.0239
LAV	L4	Sun	9	12.042	4.026	1.362	47.6345	39.1992	167.054	44.9505
LAV	L4	Sun	10	14.288	5.054	1.072	73.7255	59.5333	282.346	37.8799
LAV	L4	Sun	11	21.604	7.23	1.413	91.2717	76.124	273.864	68.2609
LAV	L5	Shade	1	24.216	7.093	0.767	78.5724	63.9282	252.42	18.0471
LAV	L5	Shade	2	16.408	4.202	1.171	39.8059	34.5504	86.9979	81.3194
LAV	L5	Shade	3	17.444	5.124	2.114	63.4789	55.6427	206.613	152.086
LAV	L5	Shade	4	21.83	6.826	1.246	71.9987	59.7427	232.969	37.8723
LAV	L5	Shade	5	19.138	5.573	1.997	53.2499	45.3615	128.707	104.01
LAV	L5	Shade	6	17.51	4.727	1.12	61.0956	50.7095	147.259	42.1053
LAV	L5	Shade	7	16.623	4.648	1.754	55.9132	48.1966	173.433	84.3269
LAV	L5	Shade	8	20.269	6.666	1.395	79.5487	67.9484	287.328	68.7192
LAV	L5	Shade	9	14.168	4.462	1.322	45.7475	38.7739	133.994	59.0179
LAV	L5	Shade	10	17.542	6.261	1.329	81.1754	69.7218	311.493	86.2987
LAV	L5	Shade	11	14.663	4.617	1.872	62.2897	52.5744	170.369	114.146
LAV	L5	Sun	1	16.259	6.223	0.909	85.1702	69.1402	270.565	42.7563
LAV	L5	Sun	2	13.775	4.609	1.559	50.6993	43.8136	162.289	109.021
LAV	L5	Sun	3	10.208	4.288	1.355	39.3827	32.5096	184.828	42.8797
LAV	L5	Sun	4	25.357	7.611	0.929	164.656	135.671	472.733	55.2976
LAV	L5	Sun	5	13.322	4.772	1.859	29.9236	26.0297	96.5992	108.081
LAV	L5	Sun	6	16.195	6.772	1.276	73.4134	58.6775	284.538	40.3797
LAV	L5	Sun	7	14.542	4.859	1.701	59.2101	48.815	139.626	97.2
LAV	L5	Sun	8	21.062	7.542	1.367	85.5831	70.2067	307.837	46.4966
LAV	L5	Sun	9	16.017	6.544	0.983	51.1398	42.6097	176.388	38.3984
LAV	L5	Sun	10	15.263	6.398	1.205	66.5635	56.238	232.655	82.5342
LAV	L5	Sun	11	17.274	4.953	2.346	72.0651	60.7811	162.393	167.571
LAV	L6	Shade	1	22.707	5.607	2.422	66.9231	53.1655	129.194	54.5495
LAV	L6	Shade	2	24.63	6.642	1.217	75.1832	55.2986	151.991	16.4238
LAV	L6	Shade	3	26.041	6.58	1.379	78.5551	64.9888	147.204	56.2857
LAV	L6	Shade	4	28.206	6.79	0.763	79.0305	66.6966	167.241	30.0394
LAV	L6	Shade	5	33.797	7.738	1.36	95.0422	79.0943	167.489	53.3333
LAV	L6	Shade	6	24.419	4.948	1.582	55.3844	44.9623	88.0427	34.3913
LAV	L6	Shade	7	30.754	8.227	2.05	100.536	84.582	262.843	77.6515
LAV	L6	Shade	8	25.245	7.29	1.584	61.6183	48.6979	123.35	31.9355
LAV	L6	Shade	9	29.752	7.825	1.898	94.2414	75.3215	189.927	49.8163
LAV	L6	Shade	10	21.632	7.123	1.083	56.5099	45.8986	139.667	28.88
LAV	L6	Shade	11	28.886	7.421	2.318	108.922	88.3905	193.255	99.9138
LAV	L6	Sun	1	15.862	5.568	2.013	73.4012	61.0077	232	101.156
LAV	L6	Sun	2	26.385	6.104	2.729	127.958	102.466	242.222	104.559
LAV	L6	Sun	3	14.912	6.766	0.995	34.2647	26.9754	155.183	13.4459
LAV	L6	Sun	4	21.072	6.71	0.737	97.9637	78.3346	213.694	32.7556
LAV	L6	Sun	5	18.506	7.148	1.165	63.5072	54.0479	222.679	61.6402
LAV	L6	Sun	6	21.329	7.501	2.728	92.9368	76.0663	248.377	131.787
LAV	L6	Sun	7	17.045	6.647	0.816	57.1596	43.5822	188.3	14.1667
LAV	L6	Sun	8	17.215	6.454	0.96	72.3319	60.4672	209.545	60.3774
LAV	L6	Sun	9	18.381	5.887	2.325	90.3687	75.3629	216.434	174.812
LAV	L6	Sun	10	21.445	6.705	1.236	76.9742	60.3744	218.404	26.9281
LAV	L6	Sun	11	24.465	7.717	1.914	72.5964	60.3478	194.383	66.6899
LAV	L7	Shade	1	20.365	5.767	2.168	200.443	167.475	447.054	305.352
LAV	L7	Shade	2	14.611	5.37	1.003	48.1417	40.096	163.72	35.694
LAV	L7	Shade	3	13.015	5.203	1.639	65.01	52.6071	205.652	74.8402
LAV	L7	Shade	4	17.002	5.361	1.103	82.0956	64.0377	204.618	34.2547
LAV	L7	Shade	5	24.186	6.593	1.14	104.837	86.8438	223.492	62.2951
LAV	L7	Shade	6	18.208	5.866	1.193	54.2712	45.7487	148.506	51.8696
LAV	L7	Shade	7	11.969	3.918	1.506	50.3111	42.1147	128.459	95.3165
LAV	L7	Shade	8	15.422	5.44	1.752	102.065	79.7827	323.81	68.9764
LAV	L7	Shade	9	13.159	3.643	1.661	59.4892	46.3508	131.043	47.5931
LAV	L7	Shade	10	15.287	5.53	1.362	93.7853	74.6071	343.478	52.7907
LAV	L7	Shade	11	14.741	3.718	2.448	76.776	60.2165	158.213	83.5495
LAV	L7	Sun	1	9.955	3.338	0.69	27.3715	20.87	71.6309	10.3448
LAV	L7	Sun	2	12.365	4.114	1.411	78.4084	66.5143	276.107	106.09
LAV	L7	Sun	3	20.897	5.43	0.991	105.594	84.7748	274.242	34.4097
LAV	L7	Sun	4	12.841	3.777	0.79	36.7937	18.9703	145.83	2.61589
LAV	L7	Sun	5	10.339	4.657	1.031	58.0843	49.8505	258.722	90.4386
LAV	L7	Sun	6	11.347	3.839	0.7	75.6467	59.7211	218.125	31.25
LAV	L7	Sun	7	10.155	2.852	0.75	70.0828	60.6269	221.085	77.3196
LAV	L7	Sun	8	10.393	3.629	0.762	70.4133	59.4225	283.516	52.5517
LAV	L7	Sun	9	10.96	2.943	1.147	82.9674	67.1157	211.727	66.3006
LAV	L7	Sun	10	17.113	5.061	1.276	106.424	85.7365	356.408	51.8699
LAV	L7	Sun	11	9.579	4.267	0.794	38.8758	30.2845	147.647	19.3659
LAV	L8	Shade	1	28.913	6.177	0.869	78.249	66.1473	266.25	19.5721
LAV	L8	Shade	2	26.11	5.796	0.623	63.205	54.6806	140	27.087
LAV	L8	Shade	3	12.771	4.235	0.982	40.5171	35.1721	130.308	63.7662
LAV	L8	Shade	4	22.573	4.138	1.206	160.548	135.982	331.04	93.4884
LAV	L8	Shade	5	28.697	6.006	1.552	100.656	86.9606	274.247	67.4783
LAV	L8	Shade	6	26.64	4.091	1.705	82.4002	70.8511	145.587	69.3089
LAV	L8	Shade	7	26.391	5.824	0.781	76.3849	65.9775	234.839	26.2963
LAV	L8	Shade	8	34.246	7.03	1.211	111.369	96.9867	251.071	68.8068
LAV	L8	Shade	9	14.304	4.283	1.218	50.084	42.9292	171.32	53.8938
LAV	L8	Shade	10	31.312	6.51	1.656	55.1559	44.5342	106.547	22.288
LAV	L8	Shade	11	37.487	7.5	1.175	95.7522	81.0004	192.802	36.2654
LAV	L8	Sun	1	17.529	4.95	1.183	87.9087	63.3502	253.846	20.4671
LAV	L8	Sun	2	31.003	6.686	2.04	89.9681	77.7407	195.497	102
LAV	L8	Sun	3	18.217	4.4	1.757	72.2897	62.0893	183.333	100.977
LAV	L8	Sun	4	17.871	4.737	0.767	60.9516	51.8451	204.181	27.1025
LAV	L8	Sun	5	24.266	5.272	1.636	99.3694	86.8504	284.973	97.9641
LAV	L8	Sun	6	18.606	3.635	1.477	43.2095	36.6765	111.162	33.5682
LAV	L8	Sun	7	16.529	4.715	1.121	57.1147	49.062	260.497	38.1293
LAV	L8	Sun	8	22.022	5.469	1.04	87.3889	75.5472	249.726	59.0909
LAV	L8	Sun	9	31.331	5.971	1.442	90.6568	75.7703	175.103	42.6627
LAV	L8	Sun	10	29.854	6.733	1.281	156.796	130.083	403.174	57.1875
LAV	L8	Sun	11	21.043	3.882	1.488	50.7427	41.9685	101.358	30.7438
LAV	L9	Shade	1	20.893	3.887	2.83	109.963	90.7602	192.426	141.5
LAV	L9	Shade	2	14.299	3.714	1.446	41.4584	33.7479	123.389	29.692
LAV	L9	Shade	3	20.814	5.659	1.572	89.5611	72.8782	248.202	51.7105
LAV	L9	Shade	4	14.563	4.172	1.152	42.8324	35.1848	105.888	33.3913
LAV	L9	Shade	5	20.926	4.292	2.2	92.8394	77.3604	155.507	125.714
LAV	L9	Shade	6	15.553	4.146	1.888	49.2651	38.6026	120.523	35.7576
LAV	L9	Shade	7	15.977	4.146	1.445	71.4535	56.959	169.224	44.5988
LAV	L9	Shade	8	18.244	5.857	1.015	74.924	62.1178	212.982	44.7137
LAV	L9	Shade	9	12.234	3.544	1.051	48.7799	40.6986	107.069	62.9341
LAV	L9	Shade	10	14.609	3.892	1.167	79.3536	65.8063	211.522	59.8462
LAV	L9	Shade	11	19.861	3.892	2.238	94.9833	79.9557	158.857	151.216
LAV	L9	Sun	1	17.611	4.973	1.908	45.5771	39.4777	131.561	87.1233
LAV	L9	Sun	2	12.354	3.92	1.63	45.4024	37.8725	122.884	73.4234
LAV	L9	Sun	3	15.923	4.654	1.37	80.3786	62.5167	193.917	42.0245
LAV	L9	Sun	4	9.939	4.241	0.631	36.6753	30.6475	155.919	24.1762
LAV	L9	Sun	5	21.71	5.839	1.973	158.931	134.012	322.597	270.274
LAV	L9	Sun	6	13.813	3.432	1.595	42.8177	35.3183	88.9119	53.3445
LAV	L9	Sun	7	16.35	4.68	0.818	79.4461	64.5225	191.02	35.4113
LAV	L9	Sun	8	14.634	5.109	1.282	61.799	53.0602	182.464	116.545
LAV	L9	Sun	9	10.706	3.704	1.63	45.7913	37.9915	128.611	84.8958
LAV	L9	Sun	10	13.199	3.894	2.458	77.5499	62.6436	221.25	107.336
LAV	L9	Sun	11	12.852	3.838	1.84	57.4519	45.5745	182.762	49.3298
LAV	L10	Shade	1	31.406	8.35	2.323	91.2435	69.1153	240.634	30.7682
LAV	L10	Shade	2	18.434	4.975	1.756	50.0244	42.3575	110.066	81.6744
LAV	L10	Shade	3	30.145	8.8	2.368	129.211	109.34	379.31	123.333
LAV	L10	Shade	4	17.929	4.543	1.84	45.4474	40.3534	176.77	76.3485
LAV	L10	Shade	5	24.792	5.35	2.694	116.34	100.332	295.58	169.434
LAV	L10	Shade	6	30.051	7.946	2.389	93.3551	79.8379	270.272	95.1793
LAV	L10	Shade	7	18.313	4.574	1.801	53.0197	44.2985	107.624	70.6275
LAV	L10	Shade	8	32.021	8.029	1.968	154.095	133.31	427.074	144.706
LAV	L10	Shade	9	22.889	4.972	2.235	54.3424	46.2217	108.322	79.5374
LAV	L10	Shade	10	13.876	4.438	1.373	47.6511	39.7593	162.564	45.0164
LAV	L10	Shade	11	19.904	5.219	0.373	147.001	126.455	367.535	47.8205
LAV	L10	Sun	1	16.167	4.338	1.087	54.3794	44.8959	173.52	28.7566
LAV	L10	Sun	2	18.102	4.585	2.635	95.7271	82.3567	256.145	205.859
LAV	L10	Sun	3	21.974	6.361	1.128	83.7424	69.6041	245.598	41.1679
LAV	L10	Sun	4	12.948	4.228	1.634	43.8618	37.6395	128.902	102.125
LAV	L10	Sun	5	21.295	5.396	1.063	110.509	92.6675	296.484	56.2434
LAV	L10	Sun	6	19.894	4.808	1.74	78.4155	68.5764	188.549	159.633
LAV	L10	Sun	7	18.553	4.724	1.258	70.3298	59.3886	178.264	56.9231
LAV	L10	Sun	8	30.375	7.28	1.807	122.628	105.689	290.04	123.767
LAV	L10	Sun	9	20.769	5.472	2.092	55.1194	47.1487	129.057	98.216
LAV	L10	Sun	10	28.176	5.5	1.664	99.2462	80.5029	175.719	47.8161
LAV	L10	Sun	11	24.632	5.587	3.083	63.4192	53.6645	175.141	79.6641
LAV	L11	Shade	1	11.568	4.188	1.906	48.3006	33.9935	208.358	23.6183
LAV	L11	Shade	2	16.427	6.292	0.831	95.7843	73.5318	400.764	22.9558
LAV	L11	Shade	3	18.477	5.172	2.115	81.289	69.9886	210.244	174.793
LAV	L11	Shade	4	26.698	7.403	1.291	93.8418	75.8466	285.83	31.0337
LAV	L11	Shade	5	20.353	6.627	1.141	49.7628	42.3933	144.065	45.4582
LAV	L11	Shade	6	30.929	7.143	1.438	101.975	84.5055	194.103	55.5212
LAV	L11	Shade	7	30.929	7.401	1.221	65.8905	56.512	174.965	34.2978
LAV	L11	Shade	8	26.299	5.616	1.143	97.0443	81.6232	168.649	63.8547
LAV	L11	Shade	9	27.771	7.074	3.746	77.0988	67.5201	229.675	184.532
LAV	L11	Shade	10	25.326	5.875	1.245	58.3548	45.5176	154.605	14.7512
LAV	L11	Shade	11	17.332	5.349	0.669	49.7189	43.3192	173.669	32.3188
LAV	L11	Sun	1	12.842	2.284	1.307	62.7357	47.0593	93.6066	29.847
LAV	L11	Sun	2	11.677	2.704	1.55	36.7664	33.8955	181.477	129.167
LAV	L11	Sun	3	16.664	4.75	2.038	75.9526	61.3549	320.946	54.492
LAV	L11	Sun	4	17.65	4.837	1.834	58.2124	46.4351	195.04	35.2015
LAV	L11	Sun	5	17.157	5.874	1.444	54.2943	44.9843	228.56	36.3728
LAV	L11	Sun	6	10.766	3.945	0.982	37.6697	30.5332	146.654	24.6115
LAV	L11	Sun	7	20.218	5.134	1.595	119.421	100.487	305.595	105.629
LAV	L11	Sun	8	20.365	5.2	1.658	54.1766	41.8516	146.893	22.0186
LAV	L11	Sun	9	17.115	4.806	1.292	49.5656	40.0632	164.027	24.5627
LAV	L11	Sun	10	26.903	5.642	2.632	97.0527	81.3025	214.525	96.0584
LAV	L11	Sun	11	16.069	4.589	2.97	32.6274	25.9052	110.845	34.375
LAV	L12	Shade	1	27.774	7.6	1.715	86.4964	73.7885	238.994	72.9787
LAV	L12	Shade	2	19.729	7	1.421	82.895	70.4607	301.724	75.5851
LAV	L12	Shade	3	17.945	4.499	2.286	109.022	91.9785	348.76	129.886
LAV	L12	Shade	4	14.469	3.834	2.235	78.7643	66.0685	250.588	111.75
LAV	L12	Shade	5	32.811	8.488	1.979	114.644	98.2954	267.76	124.465
LAV	L12	Shade	6	15.442	4.915	2.259	67.9965	55.9088	228.605	81.8478
LAV	L12	Shade	7	10.878	3.716	1.97	82.5341	70.5905	320.345	184.112
LAV	L12	Shade	8	19.287	6.686	2.292	115.491	94.1748	379.886	113.465
LAV	L12	Shade	9	28.939	5.179	3.457	100.587	83.3977	237.569	92.1867
LAV	L12	Shade	10	20.389	4.858	1.72	105.37	88.2259	305.535	79.2627
LAV	L12	Shade	11	19.559	6.95	2.458	170.97	125.539	457.237	93.8168
LAV	L12	Sun	1	14.423	4.349	1.586	61.0885	50.6426	188.268	61.9531
LAV	L12	Sun	2	17.565	5.541	2.039	87.2145	72.6427	250.724	111.421
LAV	L12	Sun	3	15.318	4.847	2.08	82.09	63.8516	256.455	60.4651
LAV	L12	Sun	4	14.877	4.388	2.133	66.4448	50.1923	221.616	40.4744
LAV	L12	Sun	5	12.778	3.988	1.949	70.4022	56.615	227.886	72.9963
LAV	L12	Sun	6	11.582	4.38	1.48	76.4993	62.0021	248.864	83.1461
LAV	L12	Sun	7	15.378	5.162	1.634	77.0055	63.4144	235.708	78.1818
LAV	L12	Sun	8	18.446	4.568	2.083	64.474	52.1368	205.766	45.7802
LAV	L12	Sun	9	19.726	5.174	3.173	82.7433	66.6644	213.802	95.2853
LAV	L12	Sun	10	20.058	5.248	2.007	78.9374	62.9172	246.385	46.2442
LAV	L12	Sun	11	14.787	3.608	1.92	75.099	60.8769	212.235	66.2069
LAV	L13	Shade	1	13.12	5.319	0.792	51.451	41.984	205.367	25.0633
LAV	L13	Shade	2	16.798	4.888	0.525	96.2085	83.4891	270.055	61.7647
LAV	L13	Shade	3	15.662	5.658	0.861	70.933	63.2553	287.208	121.268
LAV	L13	Shade	4	9.672	4.959	0.945	47.435	40.931	227.477	89.1509
LAV	L13	Shade	5	26.543	7.462	1.618	205.6	176.6	569.618	199.753
LAV	L13	Shade	6	13.534	5.318	1.329	38.2208	31.703	133.955	40.1511
LAV	L13	Shade	7	16.239	5.468	1.493	101.621	86.1485	355.065	112.256
LAV	L13	Shade	8	19.765	6.346	1.415	101.777	87.2242	335.767	104.815
LAV	L13	Shade	9	16.018	4.343	1.73	64.3293	55.7924	182.479	120.979
LAV	L13	Shade	10	14.93	4.947	2.853	71.9865	61.7197	303.497	156.758
LAV	L13	Shade	11	12.719	3.86	1.343	74.2932	59.7417	224.419	54.8163
LAV	L13	Sun	1	14.332	5.085	1.03	54.0015	43.0003	186.264	25.3695
LAV	L13	Sun	2	18.049	6.622	1.05	78.3377	66.6507	274.772	64.4172
LAV	L13	Sun	3	11.593	4.96	0.716	46.6144	39.5936	162.092	53.037
LAV	L13	Sun	4	11.054	4.853	0.668	64.6433	54.2128	223.641	59.6429
LAV	L13	Sun	5	18.304	5.758	0.94	95.3333	82.4505	336.725	72.8682
LAV	L13	Sun	6	14.759	6.139	0.995	54.301	46.7945	226.531	60.303
LAV	L13	Sun	7	11.923	5.405	1.859	62.099	52.1338	220.612	152.377
LAV	L13	Sun	8	15.659	5.221	1.906	97.3818	80.509	308.935	113.452
LAV	L13	Sun	9	12.5	5.415	0.661	53.2822	43.554	260.337	20.9177
LAV	L13	Sun	10	9.889	4.97	1.679	66.3691	56.2834	265.775	209.875
LAV	L13	Sun	11	15.739	5.569	1.548	112.824	93.4065	418.722	98.5987
LAV	L14	Shade	1	18.872	7.179	1.077	137.752	115.708	505.563	90.5042
LAV	L14	Shade	2	14.768	6.074	1.627	50.9066	42.7191	177.085	76.385
LAV	L14	Shade	3	15.699	5.721	2.527	71.5542	55.4539	215.075	68.1132
LAV	L14	Shade	4	14.774	6.273	1.811	58.0283	47.7659	224.839	67.5746
LAV	L14	Shade	5	15.366	7.454	1.724	73.4161	60.6154	288.915	93.6957
LAV	L14	Shade	6	14.316	5.771	2.243	66.8035	53.3781	199.689	89.72
LAV	L14	Shade	7	14.541	5.636	2.159	65.5	49.325	198.451	48.6261
LAV	L14	Shade	8	18.886	6.768	1.332	88.959	66.4298	258.321	29.083
LAV	L14	Shade	9	30.49	9.266	2.013	136.116	112.676	347.041	101.156
LAV	L14	Shade	10	18.86	7.679	1.209	44.6814	36.9587	135.912	38.1388
LAV	L14	Shade	11	9.907	4.441	1.939	39.3291	32.4394	135.81	93.2212
LAV	L14	Sun	1	13.494	6.295	1.333	87.3398	75.4698	542.672	104.961
LAV	L14	Sun	2	13.706	4.554	1.868	71.3111	58.9252	195.451	109.24
LAV	L14	Sun	3	14.58	5.915	1.999	63.1716	53.1729	271.33	92.5463
LAV	L14	Sun	4	14.703	4.647	2.215	61.0336	49.8238	172.751	81.1355
LAV	L14	Sun	5	10.991	3.957	2.029	46.3169	37.7179	179.05	63.4062
LAV	L14	Sun	6	21.524	7.37	1.825	127.286	101.72	457.764	69.1288
LAV	L14	Sun	7	9.25	4.065	2.129	28.1583	23.603	103.435	88.3402
LAV	L14	Sun	8	18.015	7.387	1.663	126.332	99.5304	439.702	76.9907
LAV	L14	Sun	9	15.618	6.585	1.017	62.3473	51.4257	201.376	49.6098
LAV	L14	Sun	10	15.592	5.443	0.94	86.0486	72.4199	230.636	89.5238
LAV	L14	Sun	11	9.856	4.421	1.383	53.1894	44.6579	189.742	114.298
LAV	L15	Shade	1	13.217	3.669	1.02	64.098	53.1016	191.094	43.4043
LAV	L15	Shade	2	16.532	3.425	1.209	83.9188	71.8783	182.181	85.1408
LAV	L15	Shade	3	11.965	4.275	1.185	64.9213	53.2488	259.091	49.5816
LAV	L15	Shade	4	30.674	3.995	1.595	68.7604	59.3537	110.972	45.9654
LAV	L15	Shade	5	19.654	5.011	0.957	66.987	55.8987	163.225	34.8
LAV	L15	Shade	6	22.321	5.385	1.277	78.1821	67.2927	191.637	70.5525
LAV	L15	Shade	7	19.606	4.084	1.503	73.8178	58.8592	121.91	44.2059
LAV	L15	Shade	8	20.626	3.23	1.593	63.9764	51.6295	102.866	34.8578
LAV	L15	Shade	9	12.849	3.841	2.026	71.5025	57.3104	228.631	73.1408
LAV	L15	Shade	10	15.109	3.925	1.308	74.5387	58.1563	192.402	35.6403
LAV	L15	Shade	11	17.29	3.278	1.566	80.9836	71.8322	172.526	190.976
LAV	L15	Sun	1	9.774	3.423	0.865	61.5879	44.4879	74.413	57.6667
LAV	L15	Sun	2	17.686	4.027	2.347	54.7554	42.5042	150.824	35.3464
LAV	L15	Sun	3	18.057	4.067	1.331	71.9402	62.1156	195.529	70.4233
LAV	L15	Sun	4	16.077	3.901	1.738	66.599	55.0205	183.146	58.9153
LAV	L15	Sun	5	16.774	4.379	1.173	76.1071	64.7395	214.657	64.0984
LAV	L15	Sun	6	12.357	2.324	1.432	65.1397	54.9689	180.155	64.5045
LAV	L15	Sun	7	14.162	3.895	1.271	61.5739	51.6861	205	50.84
LAV	L15	Sun	8	9.291	3.233	1.112	69.7523	56.9651	262.846	63.1818
LAV	L15	Sun	9	8.915	3.218	1.087	72.5977	59.118	279.826	65.8788
LAV	L15	Sun	10	20.955	4.568	2.06	104.15	76.3945	179.843	43.1866
LAV	L15	Sun	11	16.49	4.574	1.511	81.1915	63.6925	215.755	43.6705
LAV	L16	Shade	1	21.049	5.091	0.977	111.725	93.5511	292.586	50.8854
LAV	L16	Shade	2	12.579	4.544	1.24	39.807	35.039	140.681	115.888
LAV	L16	Shade	3	13.157	3.43	1.287	64.5584	53.5927	161.033	63.0882
LAV	L16	Shade	4	17.669	3.972	1.118	82.72	67.6196	205.803	39.3662
LAV	L16	Shade	5	19.114	4.558	1.265	68.6566	59.085	193.957	58.5648
LAV	L16	Shade	6	17.255	5.143	0.69	58.5511	48.8533	165.37	25.1825
LAV	L16	Shade	7	16.865	4.057	1.576	90.7208	77.8265	211.302	135.862
LAV	L16	Shade	8	21.245	4.457	1.78	91.7314	73.7162	202.591	51.4451
LAV	L16	Shade	9	24.341	4.411	2.062	75.2892	64.089	203.272	59.2529
LAV	L16	Shade	10	20.282	4.318	1.688	49.9188	41.1901	140.651	30.4693
LAV	L16	Shade	11	16.852	3.543	1.184	59.9502	49.9911	139.488	38.6928
LAV	L16	Sun	1	16.818	4.167	1.795	67.5422	56.7026	160.888	82.7189
LAV	L16	Sun	2	12.51	3.781	1.775	45.8578	37.7717	136.993	57.6299
LAV	L16	Sun	3	18.506	5.833	0.972	81.4883	61.4001	216.84	20.5063
LAV	L16	Sun	4	16.464	3.89	1.069	52.019	43.5671	96.0494	51.1483
LAV	L16	Sun	5	26.849	6.751	1.497	111.592	95.1417	297.401	79.2063
LAV	L16	Sun	6	16.176	3.307	1.309	39.2241	31.6928	65.2268	27.6744
LAV	L16	Sun	7	14.864	3.945	1.864	70.3122	59.2427	202.308	93.2
LAV	L16	Sun	8	15.575	3.951	1.032	73.1221	58.3771	189.952	31.2727
LAV	L16	Sun	9	19.614	3.478	1.044	89.9725	76.1709	180.207	51.6832
LAV	L16	Sun	10	14.225	3.742	1.478	53.2174	45.3893	157.227	66.278
LAV	L16	Sun	11	11.605	3.778	1.223	44.9458	37.053	169.417	37.4006
LAV	L17	Shade	1	21.85	5.206	1.263	85.6863	73.6186	225.368	67.5401
LAV	L17	Shade	2	17.898	4.795	0.694	53.8772	45.3918	127.188	28.4426
LAV	L17	Shade	3	20.411	5.872	0.552	71.2924	61.2759	185.237	36.5563
LAV	L17	Shade	4	8.973	4.795	0.748	26.8091	23.3855	133.939	56.6667
LAV	L17	Shade	5	14.013	4.165	0.498	86.9293	72.9084	202.184	47.8846
LAV	L17	Shade	6	16.625	5.034	0.689	76.8964	67.3895	226.757	83.012
LAV	L17	Shade	7	21.073	4.3	0.609	82.9646	71.9952	164.751	48.3333
LAV	L17	Shade	8	13.783	4.378	0.679	46.0047	40.754	160.956	59.5614
LAV	L17	Shade	9	9.887	3.695	0.449	45.9433	39.8509	174.292	38.3761
LAV	L17	Shade	10	9.719	4.797	0.9	61.7864	53.9645	296.111	136.364
LAV	L17	Shade	11	13.663	5.263	1.751	88.2053	72.4443	243.657	144.711
LAV	L17	Sun	1	20.684	4.821	0.949	85.0144	57.8573	52.4022	42.7477
LAV	L17	Sun	2	18.011	4.829	0.86	53.8445	45.7016	146.778	32.2097
LAV	L17	Sun	3	21.802	3.695	0.765	85.431	74.435	150.816	57.9545
LAV	L17	Sun	4	15.461	4.282	1.047	46.0012	40.3892	162.814	51.3235
LAV	L17	Sun	5	24.836	4.792	1.365	95.9289	82.8143	217.818	71.8421
LAV	L17	Sun	6	12.536	4.397	0.792	29.9904	25.2335	117.882	19.0843
LAV	L17	Sun	7	14.964	4.129	0.818	84.5424	71.7698	208.535	69.9145
LAV	L17	Sun	8	14.904	3.846	0.745	59.1194	51.1286	168.684	44.8795
LAV	L17	Sun	9	9.702	4.116	0.654	45.7426	39.8439	243.55	45.1034
LAV	L17	Sun	10	16.05	5.107	0.79	123.938	106.011	345.068	111.268
LAV	L17	Sun	11	19.784	4.463	0.718	97.6024	82.2962	189.11	50.922
LAV	L18	Shade	1	17.193	4.8	1.276	59.2862	49.4905	181.818	41.1613
LAV	L18	Shade	2	26.081	5.851	1.296	107.728	92.6501	274.695	71.6022
LAV	L18	Shade	3	21.262	5.208	2.135	54.1156	46.6784	145.882	79.368
LAV	L18	Shade	4	20.27	5.097	1.343	57.4058	46.3103	164.419	25.056
LAV	L18	Shade	5	19.358	5.03	1.183	64.8075	55.0412	214.043	40.1017
LAV	L18	Shade	6	18.817	4.582	1.751	63.873	53.5639	166.618	59.9658
LAV	L18	Shade	7	18.205	5.374	2.401	61.6283	51.1233	235.702	63.3509
LAV	L18	Shade	8	10.607	4.172	0.904	39.9059	30.6561	136.34	18.2258
LAV	L18	Shade	9	9.197	2.584	1.149	49.1818	43.9837	217.143	112.647
LAV	L18	Shade	10	16.954	4.772	1.113	124.296	109.029	554.884	106
LAV	L18	Shade	11	22.086	5.916	1.635	97.1667	83.786	295.8	100.307
LAV	L18	Sun	1	19.47	4.834	1.631	85.3199	66.9072	170.211	47.4128
LAV	L18	Sun	2	28.3	5.471	1.237	99.7181	84.5786	218.84	47.9457
LAV	L18	Sun	3	28.3	4.155	1.108	70.1189	60.1744	120.087	34.5171
LAV	L18	Sun	4	17.991	4.854	0.916	83.0993	71.5632	266.703	54.8503
LAV	L18	Sun	5	17.297	4.824	1.12	65.7431	56.9355	207.039	64.3678
LAV	L18	Sun	6	32.123	5.677	1.514	123.218	104.025	237.531	62.562
LAV	L18	Sun	7	18.581	5.294	1.977	43.1715	37.3412	140.053	67.2449
LAV	L18	Sun	8	33.881	5.853	1.485	127.66	105.581	264.842	44.4611
LAV	L18	Sun	9	25.892	5.739	2.154	58.6057	51.3018	154.274	83.8132
LAV	L18	Sun	10	19.239	4.774	1.282	49.4576	39.9315	150.126	21.0164
LAV	L18	Sun	11	19.582	4.882	1.412	75.4314	65.3823	213.188	83.0588
LAV	L19	Shade	1	29.3	5.528	0.907	64.0857	53.36	117.868	20.1556
LAV	L19	Shade	2	11.733	4.288	1.029	79.1167	61.1412	240.899	39.8837
LAV	L19	Shade	3	14.875	4.669	0.982	75.2783	60.101	196.176	37.6245
LAV	L19	Shade	4	11.202	3.197	1.469	73.4557	51.4798	222.014	28.9744
LAV	L19	Shade	5	11.023	3.333	0.74	67.0907	53.0207	220.728	25.9649
LAV	L19	Shade	6	19.992	5.77	1.723	68.7719	49.9176	166.763	22.9122
LAV	L19	Shade	7	16.8	4.72	1.296	71.0059	56.5086	178.113	37.8947
LAV	L19	Shade	8	16.964	5.136	1.414	65.9308	51.9253	197.538	32.5806
LAV	L19	Shade	9	13.097	3.052	1.489	43.788	35.2924	163.209	27.9362
LAV	L19	Shade	10	13.154	4.873	1.342	79.4324	61.7849	243.65	49.1575
LAV	L19	Shade	11	12.779	4.694	0.897	69.4134	52.7186	184.078	27.3476
LAV	L19	Sun	1	13.398	4.977	1.179	41.0352	35.3883	164.257	54.0826
LAV	L19	Sun	2	14.79	6.139	1.374	81.6676	66.5916	246.546	85.3416
LAV	L19	Sun	3	19.728	5.695	2.123	60.8326	48.9407	170	46.8653
LAV	L19	Sun	4	16.055	5.14	0.974	81.4975	64.9211	189.668	41.9828
LAV	L19	Sun	5	13.628	3.724	1.669	73.4663	56.5008	224.337	42.6854
LAV	L19	Sun	6	18.292	5.699	2.035	62.8591	46.6395	195.842	28.2247
LAV	L19	Sun	7	15.347	5.028	1.124	71.2158	59.9492	204.39	70.6918
LAV	L19	Sun	8	12.739	3.458	1.405	69.0087	55.556	230.533	47.3064
LAV	L19	Sun	9	12.318	4.575	1.063	87.735	70.0284	315.517	50.619
LAV	L19	Sun	10	17.684	5.642	1.513	70.8778	59.2826	203.682	71.7062
LAV	L19	Sun	11	18.07	5.49	1.516	83.1569	68.266	219.6	67.6786
LAV	L20	Shade	1	21.689	6.841	2.451	76.4505	60.6007	174.515	70.0286
LAV	L20	Shade	2	25.745	6.423	0.94	86.2479	73.7468	196.422	52.514
LAV	L20	Shade	3	17.654	4.833	2.51	64.1964	51.635	178.339	63.0653
LAV	L20	Shade	4	22.417	4.863	0.92	90.173	78.9887	197.683	86.7925
LAV	L20	Shade	5	26.583	7.105	1.744	86.3926	72.1972	199.579	70.0402
LAV	L20	Shade	6	36.714	8.43	1.492	93.8497	78.5662	167.262	58.0545
LAV	L20	Shade	7	21.023	5.203	2.829	71.6042	57.9465	178.185	70.725
LAV	L20	Shade	8	28.651	5.774	1.14	69.7784	58.8558	119.052	41.1552
LAV	L20	Shade	9	19.791	4.869	2.43	79.7703	64.4658	190.941	72.7545
LAV	L20	Shade	10	21.909	6.473	1.12	86.6653	73.2988	225.54	64.3678
LAV	L20	Shade	11	21.949	6.81	0.979	97.0336	81.991	226.246	85.8772
LAV	L20	Sun	1	15.188	7.223	2.986	65.0728	51.4847	230.767	98.5479
LAV	L20	Sun	2	17.781	4.463	1.796	72.5163	59.6478	170.344	67.2659
LAV	L20	Sun	3	16.195	4.541	1.862	87.8254	73.8149	240.265	115.652
LAV	L20	Sun	4	24.742	6.853	2.288	75.7795	63.3923	187.24	84.1176
LAV	L20	Sun	5	21.699	6.355	1.955	66.9309	54.2746	169.92	51.178
LAV	L20	Sun	6	23.817	5.719	1.044	80.111	66.0849	161.554	37.6895
LAV	L20	Sun	7	19.785	5.119	2.448	61.425	50.5106	169.503	62.132
LAV	L20	Sun	8	17.107	6.063	1.589	98.1469	80.2392	267.093	98.0864
LAV	L20	Sun	9	17.975	6.801	2.412	91.9908	74.4306	310.548	99.6694
LAV	L20	Sun	10	10.838	6.369	1.589	93.3506	73.1309	346.141	115.985
LAV	L20	Sun	11	16.66	6.278	1.547	91.4882	76.422	306.244	100.455
CAG	C1	Shade	1	14.337	4.48	1.099	70.4867	60.3409	215.385	82.0149
CAG	C1	Shade	2	10.879	4.278	1.159	73.2593	62.3081	293.014	100.783
CAG	C1	Shade	3	12.605	4.526	0.974	83.3113	71.0942	297.763	90.1852
CAG	C1	Shade	4	18.389	4.847	1.599	69.6026	59.0527	180.858	78.3824
CAG	C1	Shade	5	10.098	3.347	1.191	56.6349	47.3862	221.656	60.4569
CAG	C1	Shade	6	13.885	4.321	0.72	70.4822	60.7393	248.333	50.7042
CAG	C1	Shade	7	14.146	4.746	1.612	78.1115	64.3	247.188	81.8274
CAG	C1	Shade	8	12.26	3.6	1.456	73.8554	61.4845	225	83.6782
CAG	C1	Shade	9	25.262	5.751	0.732	73.9953	64.3946	153.36	54.6269
CAG	C1	Shade	10	15.597	5.045	0.758	82.5238	70.1619	214.681	77.3469
CAG	C1	Shade	11	9.566	3.297	0.895	94.1535	81.6909	336.429	157.018
CAG	C1	Sun	1	12.368	4.033	1.377	51.6194	43.1091	173.09	57.375
CAG	C1	Sun	2	10.11	3.662	1.162	50.3737	42.4077	196.882	60.8377
CAG	C1	Sun	3	8.21	3.794	0.639	70.1709	60.2348	249.605	155.854
CAG	C1	Sun	4	4.426	2.441	0.939	57.6302	45.8653	308.987	79.5763
CAG	C1	Sun	5	8.636	4.065	1.067	50.8299	41.7198	206.345	61.3218
CAG	C1	Sun	6	6.869	2.986	0.694	60.5198	51.1848	255.214	77.1111
CAG	C1	Sun	7	9.701	3.728	1.05	57.0983	44.5613	218.012	34.202
CAG	C1	Sun	8	10.298	3.081	1.311	58.1479	49.4146	229.925	73.2402
CAG	C1	Sun	9	6.431	3.567	0.809	53.5025	44.8779	272.29	80.9
CAG	C1	Sun	10	7.762	3.268	0.872	67.32	56.8645	274.622	93.7634
CAG	C1	Sun	11	10.027	4.504	0.886	60.6594	49.6632	213.46	57.1613
CAG	C2	Shade	1	10.799	2.723	1.163	71.4692	60.8737	203.209	90.155
CAG	C2	Shade	2	14.39	4.151	0.962	77.9101	68.6546	354.786	72.8788
CAG	C2	Shade	3	9.022	3.384	1.04	75.5611	62.135	233.379	92.0354
CAG	C2	Shade	4	8.964	2.675	0.946	75.7735	63.7553	226.695	90.0952
CAG	C2	Shade	5	12.44	3.513	0.73	84.4535	72.6636	225.192	87.9518
CAG	C2	Shade	6	14.171	4.192	0.995	72.1905	61.5061	195.888	78.3465
CAG	C2	Shade	7	9.713	2.591	0.825	77.0262	65.8062	205.635	92.6966
CAG	C2	Shade	8	9.564	2.677	1.124	76.6961	64.8407	221.24	105.047
CAG	C2	Shade	9	11.992	3.121	1.165	72.9884	61.3715	210.878	71.4724
CAG	C2	Shade	10	14.234	2.815	0.541	87.1114	77.485	199.645	87.2581
CAG	C2	Shade	11	15.384	4.078	0.895	96.2703	84.1115	254.875	126.056
CAG	C2	Sun	1	12.597	3.927	1.328	56.1864	46.0753	158.988	54.2041
CAG	C2	Sun	2	9.966	3.557	1.021	78.3491	63.2762	197.611	83.0081
CAG	C2	Sun	3	12.586	3.031	1.393	63.1827	52.4635	163.838	62.7477
CAG	C2	Sun	4	11.557	3.673	0.723	69.1208	57.7273	200.71	49.1837
CAG	C2	Sun	5	7.497	2.507	1.108	65.3049	51.9543	210.672	62.9545
CAG	C2	Sun	6	14.369	3.807	0.602	79.2554	69.1815	198.281	83.6111
CAG	C2	Sun	7	11.571	3.929	1.103	78.6608	65.6697	247.107	83.5606
CAG	C2	Sun	8	10.985	3.536	0.662	68.3147	58.5554	221	61.2963
CAG	C2	Sun	9	15.026	4.646	1.317	68.4556	56.235	175.985	61.831
CAG	C2	Sun	10	8.81	2.769	0.571	69.8098	60.2599	251.727	63.4444
CAG	C2	Sun	11	15.549	4.244	1.218	78.6495	65.6353	179.831	78.0769
CAG	C3	Shade	1	11.964	3.703	0.805	72.5091	60.7618	181.52	70
CAG	C3	Shade	2	5.292	2.467	0.697	82.8169	68.1081	304.568	122.281
CAG	C3	Shade	3	10.461	3.137	0.653	79.0106	68.462	255.041	80.6173
CAG	C3	Shade	4	14.724	3	0.674	77.5764	68.2615	182.927	70.9474
CAG	C3	Shade	5	7.78	2.705	0.508	75.9024	64.1385	214.683	81.9355
CAG	C3	Shade	6	13.933	3.58	0.53	79.3451	68.1654	175.49	63.0952
CAG	C3	Shade	7	5.879	2.161	0.786	82.4544	68.44	308.714	103.421
CAG	C3	Shade	8	12.307	3.591	0.788	82.8197	70.3659	224.438	76.5049
CAG	C3	Shade	9	6.855	2.481	0.934	85.0496	72.848	318.077	163.86
CAG	C3	Shade	10	13.57	3.601	0.584	81.2089	71.6095	251.818	72.0988
CAG	C3	Shade	11	8.549	2.378	1.08	81.8086	69.5041	286.506	105.882
CAG	C3	Sun	1	6.022	2.637	0.473	60.8898	51.6024	241.927	68.5507
CAG	C3	Sun	2	10.54	3.485	0.78	52.4378	43.9716	169.175	43.0939
CAG	C3	Sun	3	6.64	3.097	0.813	62.4647	49.7006	216.573	62.5385
CAG	C3	Sun	4	6.459	2.149	0.776	69.3026	59.53	279.091	102.105
CAG	C3	Sun	5	14.087	3.35	0.794	61.3011	53.7672	185.083	56.3121
CAG	C3	Sun	6	12.328	3.58	1.16	60.849	51.1323	189.418	59.1837
CAG	C3	Sun	7	12.01	3.797	1.548	58.6712	47.4516	178.263	57.1218
CAG	C3	Sun	8	8.337	2.906	1.109	69.9413	59.0021	279.423	94.7863
CAG	C3	Sun	9	9.659	3.119	1.057	72.7334	61.2104	239.923	88.0833
CAG	C3	Sun	10	12.359	3.964	0.959	68.2818	57.4837	193.366	71.037
CAG	C3	Sun	11	9.477	3.342	1.453	63.9905	50.2492	228.904	56.1004
CAG	C4	Shade	1	8.778	2.453	0.755	62.2995	51.7266	169.172	52.7972
CAG	C4	Shade	2	5.219	2.61	0.643	29.6534	26.3852	196.241	75.6471
CAG	C4	Shade	3	6.478	2.731	0.819	39.0006	32.9167	177.338	53.5294
CAG	C4	Shade	4	11.6	3.692	0.554	76.0656	64.3016	181.872	72.8947
CAG	C4	Shade	5	9.63	2.889	0.788	72.7341	60.3762	199.241	62.5397
CAG	C4	Shade	6	10.669	3.561	0.664	89.8064	74.0389	213.234	77.2093
CAG	C4	Shade	7	10.649	2.887	0.805	78.7066	66.6813	189.934	87.5
CAG	C4	Shade	8	10.585	3.487	0.662	88.2819	73.6092	226.429	77.8824
CAG	C4	Shade	9	11.53	4.297	0.947	76.6622	62.6971	203.649	76.371
CAG	C4	Shade	10	11.176	3.651	0.655	88.2084	74.7059	241.788	83.9744
CAG	C4	Shade	11	10.486	4.234	0.749	123.075	91.5009	228.865	68.7156
CAG	C4	Sun	1	12.622	3.518	0.782	68.8222	58.1927	159.909	68
CAG	C4	Sun	2	9.432	3.311	0.579	68.4967	57.2678	179.946	67.3256
CAG	C4	Sun	3	7.926	3.39	0.375	73.1181	26.0552	17.7487	78.125
CAG	C4	Sun	4	10.001	2.953	0.776	65.1956	52.9995	159.622	46.1905
CAG	C4	Sun	5	9.571	3.085	0.718	86.303	72.2885	218.794	97.027
CAG	C4	Sun	6	11.842	4.093	0.542	85.5636	69.782	188.618	56.4583
CAG	C4	Sun	7	10.001	3.515	0.402	74.7459	63.1376	186.968	69.3103
CAG	C4	Sun	8	9.361	3.307	0.736	61.2631	51.181	184.749	60.3279
CAG	C4	Sun	9	11.474	4.069	0.653	62.2572	52.7056	173.889	65.3
CAG	C4	Sun	10	6.532	2.973	0.662	75.0805	60.0368	243.689	68.9583
CAG	C4	Sun	11	12.434	4.067	0.422	83.618	70.5275	189.163	69.1803
CAG	C5	Shade	1	10.471	3.36	0.489	86.8242	72.4637	195.349	72.9851
CAG	C5	Shade	2	8.452	2.887	0.667	63.7887	54.3188	204.752	74.1111
CAG	C5	Shade	3	9.934	3.423	0.864	65.3123	55.7151	222.273	80
CAG	C5	Shade	4	15.359	3.706	1.027	73.0685	62.2578	179.903	64.5912
CAG	C5	Shade	5	9.247	3.257	0.749	83.0818	70.053	252.481	96.0256
CAG	C5	Shade	6	12.279	3.4	0.986	62.8082	31.6551	175.258	5.69942
CAG	C5	Shade	7	12.407	3.509	0.869	70.3345	60.2282	179.031	86.9
CAG	C5	Shade	8	8.823	3.176	0.775	74.9618	36.9627	226.857	7.24299
CAG	C5	Shade	9	6.433	3.098	0.631	77.7872	61.9153	247.84	72.5287
CAG	C5	Shade	10	10.99	3.045	0.633	92.4306	78.165	217.5	82.2078
CAG	C5	Shade	11	11.833	3.341	0.868	78.0541	65.5931	206.235	68.8889
CAG	C5	Sun	1	9.252	2.535	0.724	52.748	42.6753	104.321	42.3392
CAG	C5	Sun	2	7.324	2.563	0.597	59.0645	48.7292	179.231	49.75
CAG	C5	Sun	3	5.38	2.569	0.575	60.2464	48.9091	221.466	63.1868
CAG	C5	Sun	4	6.427	2.534	0.626	62.3375	51.3749	193.435	70.3371
CAG	C5	Sun	5	8.982	3.214	0.751	59.2871	48.4727	163.147	53.2624
CAG	C5	Sun	6	7.083	2.824	0.792	63.0721	53.2556	229.593	94.2857
CAG	C5	Sun	7	9.741	3.109	0.999	64.0434	52.711	203.203	57.4138
CAG	C5	Sun	8	11.119	4.166	1.137	60.594	48.155	164.664	51.448
CAG	C5	Sun	9	7.164	2.831	0.574	59.1577	50.8446	206.642	94.0984
CAG	C5	Sun	10	4.691	2.16	0.619	58.8582	49.1719	257.143	84.7945
CAG	C5	Sun	11	7.854	3.817	0.952	61.6968	46.2817	191.809	42.3111
CAG	C6	Shade	1	10.739	3.535	1.041	64.0752	55.3272	222.327	98.2075
CAG	C6	Shade	2	19.058	4.905	0.687	70.7424	62.2404	213.261	49.7826
CAG	C6	Shade	3	14.604	3.642	1.103	70.0096	61.1302	218.084	81.1029
CAG	C6	Shade	4	14.344	5.375	0.957	73.7481	61.5094	215	69.854
CAG	C6	Shade	5	16.227	5.462	1.06	77.4928	63.7854	218.48	53
CAG	C6	Shade	6	11.466	3.373	1.08	68.9062	59.6256	234.236	93.913
CAG	C6	Shade	7	13.488	3.866	1.453	76.7672	64.9711	246.242	89.6914
CAG	C6	Shade	8	11.058	3.699	1.386	81.3687	68.8972	291.26	116.471
CAG	C6	Shade	9	10.408	3.094	1.053	76.417	65.9987	273.805	103.235
CAG	C6	Shade	10	19.92	5.384	1.176	80.7786	68.9751	211.969	70
CAG	C6	Shade	11	18.898	4.442	0.871	93.7866	81.5272	227.795	80.6481
CAG	C6	Sun	1	15.716	6.396	0.734	59.5529	49.3438	184.855	36.7
CAG	C6	Sun	2	12.39	4.381	1.043	61.367	52.2344	216.881	69.0728
CAG	C6	Sun	3	17.571	5.427	0.753	62.776	53.2293	176.775	38.6154
CAG	C6	Sun	4	5.474	2.285	0.62	57.3795	49.2709	313.014	73.8095
CAG	C6	Sun	5	6.476	3.633	0.649	63.8659	51.3561	245.473	65.5556
CAG	C6	Sun	6	14.87	4.842	0.806	64.0121	54.0924	192.143	46.3218
CAG	C6	Sun	7	17.106	4.954	1.732	65.0913	54.2703	180.145	69.5582
CAG	C6	Sun	8	10.716	3.985	1.175	62.8504	52.7362	242.988	72.0859
CAG	C6	Sun	9	13.403	4.402	0.736	61.2849	52.2738	222.323	41.1173
CAG	C6	Sun	10	7.895	2.876	1.028	71.448	59.4951	263.853	90.9735
CAG	C6	Sun	11	11.197	3.954	0.673	67.0078	58.1059	282.429	58.0172
CAG	C7	Shade	1	6.334	2.717	0.654	69.989	58.2169	269.01	79.7561
CAG	C7	Shade	2	13.419	3.505	0.609	69.1345	59.9062	196.91	50.3306
CAG	C7	Shade	3	9.042	2.967	0.404	76.3682	66.339	224.773	85.9574
CAG	C7	Shade	4	14.275	4.299	0.728	70.6683	60.08	199.028	52
CAG	C7	Shade	5	13.242	3.477	0.415	77.0332	67.355	213.313	49.4048
CAG	C7	Shade	6	13.671	4.085	0.543	73.2637	62.8552	188.249	59.0217
CAG	C7	Shade	7	7.803	2.667	0.778	65.4614	54	249.252	53.2877
CAG	C7	Shade	8	9.565	3.455	0.676	65.8293	55.4171	230.333	54.9593
CAG	C7	Shade	9	12.675	3.764	0.475	73.2236	62.872	200.213	48.9691
CAG	C7	Shade	10	8.644	2.924	0.587	75.0347	63.4655	243.667	65.2222
CAG	C7	Shade	11	12.557	3.696	0.549	81.645	70.5449	232.453	66.1446
CAG	C7	Sun	1	10.069	3.118	0.65	59.0211	48.9976	169.457	39.3939
CAG	C7	Sun	2	6.735	2.731	0.504	59.3915	49.3045	210.077	49.4118
CAG	C7	Sun	3	10.787	3.383	0.541	59.9944	50.1022	164.223	36.3087
CAG	C7	Sun	4	11.095	3.433	0.486	58.9846	50.8013	180.684	43.0088
CAG	C7	Sun	5	13.085	4.419	0.704	71.2691	56.8419	194.67	29.4561
CAG	C7	Sun	6	8.044	3.348	0.528	72.3381	59.0169	246.176	45.913
CAG	C7	Sun	7	8.688	3.353	0.627	62.5937	52.3058	219.15	52.25
CAG	C7	Sun	8	12.446	3.853	0.858	64.8567	54.2309	197.59	47.4033
CAG	C7	Sun	9	9.928	3.563	0.303	69.6702	60.426	228.397	48.871
CAG	C7	Sun	10	6.041	2.737	0.434	71.0706	59.3418	285.104	60.2778
CAG	C7	Sun	11	6.498	3.05	0.534	67.4066	55.9208	258.475	66.75
CAG	C8	Shade	1	8.72	3.146	0.507	71.6516	62.4195	280.893	74.5588
CAG	C8	Shade	2	12.787	3.878	0.619	58.6291	51.2505	191.034	55.7658
CAG	C8	Shade	3	18.216	4.076	0.808	61.7492	53.8616	163.04	44.3956
CAG	C8	Shade	4	13.838	3.655	0.699	58.0697	49.7233	166.136	38.8333
CAG	C8	Shade	5	15.067	4.027	0.444	56.4942	50.3745	190.853	39.292
CAG	C8	Shade	6	10.142	4.067	0.722	59.449	50.508	212.932	65.045
CAG	C8	Shade	7	17.724	4.973	1.067	66.4318	56.6262	169.727	63.1361
CAG	C8	Shade	8	15.837	4.329	0.622	65.3072	57.652	194.126	62.8283
CAG	C8	Shade	9	8.177	2.924	0.982	65.3637	54.2241	221.515	78.56
CAG	C8	Shade	10	14.854	4.074	0.675	73.4256	63.6782	225.083	52.4611
CAG	C8	Shade	11	11.368	4.274	1.327	79.3855	65.6351	286.846	87.8808
CAG	C8	Sun	1	12.916	3.977	0.565	53.8167	47.1215	182.431	45.935
CAG	C8	Sun	2	9	3.13	0.611	60.3217	52.5701	221.986	77.3418
CAG	C8	Sun	3	10.705	3.922	0.533	108.57	87.674	230.706	82
CAG	C8	Sun	4	11.356	4.193	0.746	62.3271	51.4312	167.72	54.8529
CAG	C8	Sun	5	12.388	4.544	1.103	65.4757	54.4288	191.73	75.034
CAG	C8	Sun	6	12.993	4.246	0.603	63.4424	54.9387	199.343	57.9808
CAG	C8	Sun	7	11.174	3.716	0.731	65.9622	57.2439	229.383	76.1458
CAG	C8	Sun	8	22.234	4.742	0.823	64.0934	55.4879	149.59	37.2398
CAG	C8	Sun	9	16.431	4.603	0.766	72.6393	63.0749	204.578	64.9153
CAG	C8	Sun	10	7.415	3.148	0.587	62.7858	53.5766	260.165	71.5854
CAG	C8	Sun	11	15.266	4.499	0.619	89.7472	73.5356	229.541	34.581
CAG	C9	Shade	1	8.243	3.346	0.727	61.6069	50.5086	207.826	54.6617
CAG	C9	Shade	2	9.731	2.865	1.009	55.797	45.4932	167.544	45.0446
CAG	C9	Shade	3	6.399	2.203	0.782	61.6474	51.0287	202.11	73.0841
CAG	C9	Shade	4	7.872	3.127	0.708	58.5279	47.796	187.246	52.4444
CAG	C9	Shade	5	11.926	3.884	0.561	59.6897	51.1845	209.946	38.1633
CAG	C9	Shade	6	8.636	3.483	0.931	64.1605	52.3077	199.029	71.6154
CAG	C9	Shade	7	8.029	3.249	0.638	68.1001	57.0647	233.741	71.6854
CAG	C9	Shade	8	8.864	3.624	0.835	61.986	49.6305	230.828	41.9598
CAG	C9	Shade	9	11.088	3.927	0.583	66.7952	57.7199	248.544	56.6019
CAG	C9	Shade	10	11.398	3.936	0.545	66.733	57.4496	209.362	61.9318
CAG	C9	Shade	11	11.736	3.873	0.735	70.7841	59.483	210.489	56.1069
CAG	C9	Sun	1	7.375	3.147	0.579	60.0081	51.5014	229.708	87.7273
CAG	C9	Sun	2	8.954	3.827	0.609	65.9352	55.4427	206.865	84.5833
CAG	C9	Sun	3	5.468	2.396	0.682	55.4564	43.9197	198.017	49.4203
CAG	C9	Sun	4	6.17	3.033	0.867	60.9684	48.0156	195.677	73.4746
CAG	C9	Sun	5	4.663	2.129	0.466	62.008	52.5113	276.494	78.9831
CAG	C9	Sun	6	6.737	2.298	0.929	55.403	45.0334	203.363	55.6287
CAG	C9	Sun	7	10.21	3.877	1.053	59.4296	47.9793	181.168	53.7245
CAG	C9	Sun	8	3.96	2.099	0.861	50.9653	40.9938	269.103	77.5676
CAG	C9	Sun	9	7.123	3.139	0.648	66.1989	55.5183	230.809	91.2676
CAG	C9	Sun	10	6.516	2.816	0.443	65.2906	55.2672	220	83.5849
CAG	C9	Sun	11	7.191	3.162	0.826	61.7253	51.4746	225.857	89.7826
CAG	C10	Shade	1	12.595	2.721	0.831	66.3244	57.4066	174.423	59.7842
CAG	C10	Shade	2	14.073	3.023	0.621	66.0084	56.8147	182.108	34.6927
CAG	C10	Shade	3	8.103	2.385	0.643	67.9212	58.7174	259.239	67.6842
CAG	C10	Shade	4	15.898	2.84	0.649	68.1148	59.6324	157.778	42.6974
CAG	C10	Shade	5	13.337	2.704	0.803	57.811	49.3232	148.571	37.3488
CAG	C10	Shade	6	11.051	2.874	0.922	64.2127	53.464	156.196	56.9136
CAG	C10	Shade	7	11.074	2.692	0.832	68.1058	36.8519	22.4333	46.4804
CAG	C10	Shade	8	8.567	2.388	0.802	62.9926	51.3917	168.169	48.6061
CAG	C10	Shade	9	19.158	3.524	1.075	59.9624	50.5488	128.145	33.5938
CAG	C10	Shade	10	12.227	2.559	1.086	76.1333	63.2867	178.951	59.3443
CAG	C10	Shade	11	15.231	2.97	0.961	79.5352	68.0563	192.857	56.8639
CAG	C10	Sun	1	14.722	3.099	0.485	56.9076	50.3833	152.66	36.7424
CAG	C10	Sun	2	9.789	2.7	0.907	54.4136	45.6364	145.161	56.6875
CAG	C10	Sun	3	15.467	2.849	0.63	57.2216	50.1361	131.898	37.9518
CAG	C10	Sun	4	9.444	2.827	0.986	54.2759	43.4807	129.679	46.0748
CAG	C10	Sun	5	10.217	2.319	0.642	64.7876	56.3852	212.752	50.9524
CAG	C10	Sun	6	12.511	2.576	0.698	58.1636	50.6313	161	43.625
CAG	C10	Sun	7	11.349	3.034	0.598	65.8677	56.9157	206.395	48.2258
CAG	C10	Sun	8	12.193	3.099	0.502	59.9459	52.5787	203.882	37.7444
CAG	C10	Sun	9	14.274	3.027	0.777	61.819	53.8235	171.017	46.8072
CAG	C10	Sun	10	12.015	3.359	0.565	54.9132	48.1756	194.162	42.4812
CAG	C10	Sun	11	8.609	2.704	0.878	64.8757	53.4057	191.773	60.9722
CAG	C11	Shade	1	16.717	4.719	0.754	75.3697	65.0974	227.971	52.7273
CAG	C11	Shade	2	23.958	4.949	1.39	71.2824	61.7474	183.978	55.6
CAG	C11	Shade	3	16.209	4.276	0.845	76.7472	65.6235	237.556	47.4719
CAG	C11	Shade	4	20.791	4.719	1.443	71.5205	59.3859	189.518	41.8261
CAG	C11	Shade	5	17.852	4.461	1.546	76.454	64.3315	229.948	62.8455
CAG	C11	Shade	6	13.548	2.922	1.442	80.2131	67.0693	218.06	73.198
CAG	C11	Shade	7	12.227	3.512	0.561	75.8499	66.7413	245.594	72.8571
CAG	C11	Shade	8	11.877	4.133	1.059	75.6497	33.1297	285.034	5.6631
CAG	C11	Shade	9	22.861	5.447	0.711	129.598	101.469	200.996	32.6147
CAG	C11	Shade	10	16.05	5.191	1.091	74.5471	63.3886	247.19	64.5562
CAG	C11	Shade	11	21.46	5.534	1.05	83.9593	71.4381	227.737	51.2195
CAG	C11	Sun	1	8.316	2.527	0.81	57.1546	49.6181	225.625	74.3119
CAG	C11	Sun	2	6.049	1.579	0.546	31.0205	28.7637	219.306	67.4074
CAG	C11	Sun	3	13.248	3.913	0.668	79.0453	68.9641	241.543	80.4819
CAG	C11	Sun	4	15.276	4.063	0.95	67.563	58.7087	201.139	68.3453
CAG	C11	Sun	5	14.983	3.183	1.048	71.3816	63.0332	222.587	77.6296
CAG	C11	Sun	6	14.252	4.079	0.705	77.583	68.1588	268.355	69.1176
CAG	C11	Sun	7	17.068	4.812	0.623	66.4901	58.6731	207.414	56.6364
CAG	C11	Sun	8	6.846	2.596	0.738	62.5777	53.3178	273.263	77.6842
CAG	C11	Sun	9	13.352	4.033	0.871	81.4643	70.3107	245.915	90.7292
CAG	C11	Sun	10	11.933	3.819	1.1	66.4051	55.9709	235.741	63.5838
CAG	C11	Sun	11	14.372	4.049	0.817	74.8542	65.8964	266.382	74.9541
CAG	C12	Shade	1	10.726	3.644	0.538	64.9667	54.3915	181.294	44.8333
CAG	C12	Shade	2	8.977	3.389	0.342	65.8138	54.9388	175.596	44.4156
CAG	C12	Shade	3	12.249	3.709	0.47	71.0499	60.5786	182.709	49.4737
CAG	C12	Shade	4	12.704	3.908	0.57	60.2943	50.1144	153.255	32.948
CAG	C12	Shade	5	7.844	3.547	0.59	69.3546	56.0286	207.427	60.2041
CAG	C12	Shade	6	14.601	4.289	0.534	57.2813	48.5244	144.411	32.7607
CAG	C12	Shade	7	13.544	4.592	0.986	73.1317	59.0925	199.652	46.9524
CAG	C12	Shade	8	12.028	3.623	0.683	71.0455	58.8166	180.249	45.2318
CAG	C12	Shade	9	12.46	3.528	0.634	70.2764	58.4977	174.653	40.9032
CAG	C12	Shade	10	12.759	3.471	0.66	63.383	53.5418	159.22	43.4211
CAG	C12	Shade	11	16.896	4.255	0.676	87.1827	73.6851	180.297	56.8067
CAG	C12	Sun	1	10.188	3.815	0.486	64.8504	54.5396	189.801	50.625
CAG	C12	Sun	2	10.957	3.683	0.79	59.5489	48.7628	162.247	43.8889
CAG	C12	Sun	3	9.231	3.683	0.705	61.6633	49.8973	165.157	54.2308
CAG	C12	Sun	4	11.247	4.215	0.608	69.4688	57.3827	178.602	57.9048
CAG	C12	Sun	5	13.922	4.214	0.671	71.7999	60.3468	168.56	56.8644
CAG	C12	Sun	6	10.762	3.827	0.573	67.1366	56.2572	201.421	47.75
CAG	C12	Sun	7	10.319	3.548	0.676	76.3805	64.3329	224.557	71.1579
CAG	C12	Sun	8	13.903	3.747	0.708	72.7525	62.938	160.815	108.923
CAG	C12	Sun	9	13.654	3.864	0.719	59.2364	50.7207	152.126	54.0602
CAG	C12	Sun	10	13.24	4.596	0.73	64.3031	54.085	181.66	53.6765
CAG	C12	Sun	11	9.816	3.651	0.656	76.2704	61.697	184.394	61.8868
CAG	C13	Shade	1	14.325	3.8	1.178	71.1271	58.589	180.952	53.3032
CAG	C13	Shade	2	24.346	4.1	0.706	74.8877	65.4991	129.338	47.3826
CAG	C13	Shade	3	26.14	4.624	0.767	68.5729	59.4496	117.36	40.1571
CAG	C13	Shade	4	19.446	4.216	1.092	61.8905	52.785	128.146	51.2676
CAG	C13	Shade	5	13.962	3.704	0.672	76.6301	64.7588	172.279	56.4706
CAG	C13	Shade	6	22.075	4.444	1.357	68.6412	58.5388	150.135	52.3938
CAG	C13	Shade	7	13.563	4.164	0.772	75.1829	62.5311	175.696	60.3125
CAG	C13	Shade	8	9.065	3.965	0.999	69.093	54.9394	219.061	63.6306
CAG	C13	Shade	9	13.101	3.712	1.399	76.8838	60.2899	171.852	55.2964
CAG	C13	Shade	10	15.279	3.949	1.051	65.9146	54.685	156.706	46.9196
CAG	C13	Shade	11	13.609	4.2	0.725	80.4314	68.8715	222.222	76.3158
CAG	C13	Sun	1	22.371	4.975	1.093	73.1078	61.2736	134.097	49.6818
CAG	C13	Sun	2	9.802	4.095	1.11	73.2586	56.8561	192.254	64.1618
CAG	C13	Sun	3	16.025	4.537	0.472	80.5276	67.7303	159.193	51.8681
CAG	C13	Sun	4	12.035	4.001	1.044	64.774	53.4414	168.109	66.9231
CAG	C13	Sun	5	16.429	4.217	1.13	72.152	60.8707	163.45	68.9024
CAG	C13	Sun	6	19.057	5.33	0.935	65.8728	50.697	135.623	19.7674
CAG	C13	Sun	7	17.411	5.014	0.913	73.0634	59.4435	144.913	45.65
CAG	C13	Sun	8	7.539	2.203	0.919	67.9802	55.0292	188.291	63.8194
CAG	C13	Sun	9	12.348	3.71	0.836	76.3164	67.1817	317.094	81.165
CAG	C13	Sun	10	13.452	3.908	0.834	77.2659	64.2714	179.266	62.2388
CAG	C13	Sun	11	14.341	4.569	1.136	83.1845	68.2255	191.975	81.1429
CAG	C14	Shade	1	19.29	4.68	0.808	54.8479	47.5709	131.092	44.6409
CAG	C14	Shade	2	14.368	3.87	0.535	61.8511	54.6936	182.547	58.1522
CAG	C14	Shade	3	13.332	3.968	0.603	66.2295	57.5399	205.596	54.3243
CAG	C14	Shade	4	14.71	4.338	0.683	45.9831	40.2242	149.586	40.6548
CAG	C14	Shade	5	15.345	3.905	1.02	53.7855	46.9266	136.538	77.8626
CAG	C14	Shade	6	11.703	3.172	1.244	51.0157	43.4249	157.03	62.5126
CAG	C14	Shade	7	19.515	3.806	1.684	60.9273	51.207	139.926	50.119
CAG	C14	Shade	8	16.073	3.104	0.936	54.3374	47.8933	149.952	49.0052
CAG	C14	Shade	9	25.487	5.833	0.873	70.4645	61.0029	149.564	51.0526
CAG	C14	Shade	10	14.198	3.384	0.651	60.2887	53.037	149.735	67.8125
CAG	C14	Shade	11	25.433	4.12	3.039	49.4709	39.3395	116.384	31.3299
CAG	C14	Sun	1	26.45	5.292	0.932	54.2453	47.3082	109.113	40.5217
CAG	C14	Sun	2	15.365	4.457	1.008	48.8864	42.0038	154.757	44.4053
CAG	C14	Sun	3	14.346	3.818	0.56	68.9049	60.4042	177.581	71.7949
CAG	C14	Sun	4	20.864	5.428	1.149	55.2542	46.9276	160.118	34.713
CAG	C14	Sun	5	18.566	4.766	0.562	54.9127	48.0362	129.511	48.4483
CAG	C14	Sun	6	16.6	3.864	0.934	53.6869	46.6292	148.615	44.9038
CAG	C14	Sun	7	23.518	5.088	0.697	53.0641	46.886	120.284	43.2919
CAG	C14	Sun	8	18.261	4.112	0.73	58.286	51.9073	180.351	46.4968
CAG	C14	Sun	9	21.133	5.126	1.587	53.5555	45.5944	132.113	52.7243
CAG	C14	Sun	10	19.626	4.573	0.766	53.2592	46.7508	137.327	42.5556
CAG	C14	Sun	11	12.325	4.786	0.863	57.1395	47.9385	183.372	56.4052
CAG	C15	Shade	1	11.264	3.366	0.898	75.5973	64.9971	242.158	86.3462
CAG	C15	Shade	2	10.789	3.887	0.773	77.4515	67.2212	306.063	90.9412
CAG	C15	Shade	3	9.443	3.006	0.763	69.69	60.1082	226.015	91.9277
CAG	C15	Shade	4	6.791	2.441	1.103	62.36	52.8072	334.384	88.9516
CAG	C15	Shade	5	10.432	2.937	1.169	67.13	57.3817	244.75	81.1806
CAG	C15	Shade	6	10.059	2.964	1.312	62.1693	52.6649	229.767	80.4908
CAG	C15	Shade	7	11.411	3.468	0.868	81.7407	70.3948	262.727	93.3333
CAG	C15	Shade	8	13.479	3.702	1.64	67.3613	56.2797	194.842	80.3922
CAG	C15	Shade	9	12.766	3.5	1.224	76.5807	64.7692	253.623	73.7349
CAG	C15	Shade	10	14.878	4.032	0.795	77.53	67.658	238.58	71.6216
CAG	C15	Shade	11	20.348	3.935	1.618	84.3615	71.6984	190.097	73.8813
CAG	C15	Sun	1	12.743	3.35	1.568	58.1341	46.5413	177.249	43.9216
CAG	C15	Sun	2	13.784	4.438	0.898	65.7634	55.648	214.396	51.6092
CAG	C15	Sun	3	13.611	4.604	0.682	65.3119	54.7066	188.689	42.625
CAG	C15	Sun	4	8.269	3.634	0.654	58.0688	50.176	269.185	73.4831
CAG	C15	Sun	5	9.607	3.799	0.676	62.7089	54.4923	245.097	88.9474
CAG	C15	Sun	6	7.24	2.639	1.294	55.5215	46.2029	235.625	85.6954
CAG	C15	Sun	7	15.372	4.641	1.061	65.6642	55.9389	186.386	67.1519
CAG	C15	Sun	8	14.075	3.316	1.287	60.7204	51.126	176.383	52.1053
CAG	C15	Sun	9	10.756	4.456	0.455	84.3608	73.021	305.205	87.5
CAG	C15	Sun	10	7.669	2.835	1.019	75.6312	64.8267	272.596	156.769
CAG	C15	Sun	11	19.711	5.274	0.777	94.9013	81.9925	237.568	74
CAG	C16	Shade	1	18.425	5.486	0.741	66.3725	56.4491	153.669	56.5649
CAG	C16	Shade	2	17.269	4.461	0.8	78.5312	67.4044	174.941	74.0741
CAG	C16	Shade	3	12.931	3.63	1.224	64.2694	52.7581	205.085	46.7176
CAG	C16	Shade	4	14.125	4.47	1.511	75.6156	59.5489	168.679	63.2218
CAG	C16	Shade	5	7.875	2.222	0.852	41.2304	36.7647	205.741	68.7097
CAG	C16	Shade	6	13.148	3.796	0.737	84.7165	67.2601	165.043	42.6505
CAG	C16	Shade	7	14.369	3.834	1.127	75.3487	62.0423	179.159	57.7949
CAG	C16	Shade	8	13.193	3.816	0.878	87.4867	69.9523	165.195	59.7279
CAG	C16	Shade	9	13.376	3.784	1.286	71.8367	57.457	187.327	48.7121
CAG	C16	Shade	10	8.756	3.321	1.075	59.1622	44.7648	181.475	36.6894
CAG	C16	Shade	11	10.168	2.947	0.986	70.3668	53.9703	185.346	35.2143
CAG	C16	Sun	1	9.79	3.066	0.778	65.3975	53.9097	189.259	49.5541
CAG	C16	Sun	2	8.958	3.208	0.835	57.6819	46.4386	178.222	42.602
CAG	C16	Sun	3	12.097	3.711	0.743	59.9455	49.6389	166.413	37.9082
CAG	C16	Sun	4	6.426	2.05	0.731	65.7728	53.0198	205	54.1481
CAG	C16	Sun	5	9.032	2.895	0.916	58.3086	45.5472	189.216	32.5979
CAG	C16	Sun	6	7.474	2.586	0.697	65.8502	54.6345	230.893	57.6033
CAG	C16	Sun	7	8.081	2.795	0.798	61.3126	47.285	198.227	31.92
CAG	C16	Sun	8	11.193	3.34	0.976	70.6629	56.6734	202.424	43.1858
CAG	C16	Sun	9	9.085	2.776	0.834	62.1409	51.4731	208.722	49.0588
CAG	C16	Sun	10	7.13	1.985	0.789	57.04	47.0317	187.264	49.3125
CAG	C16	Sun	11	9.514	3.347	0.76	70.2659	55.9647	206.605	41.3043
CAG	C17	Shade	1	11.952	3.691	1.091	64.7805	52.1921	173.286	47.0259
CAG	C17	Shade	2	9.251	3.073	0.976	64.422	49.7098	173.616	39.3548
CAG	C17	Shade	3	10.638	3.47	1.168	64.9451	51.2922	181.675	47.6735
CAG	C17	Shade	4	9.97	3.449	0.581	90.9672	74.9624	233.041	67.5581
CAG	C17	Shade	5	11.823	3.645	1.216	61.3226	47.5583	169.535	35.4519
CAG	C17	Shade	6	9.787	3.333	0.943	67.5898	53.8635	191.552	48.359
CAG	C17	Shade	7	11.104	3.401	0.829	91.8445	73.9281	228.255	57.5694
CAG	C17	Shade	8	8.316	3.117	0.84	70.4149	55.9623	229.191	49.7041
CAG	C17	Shade	9	8.774	2.322	1.055	68.9238	52.9192	167.05	42.8862
CAG	C17	Shade	10	12.063	3.339	1.058	73.4206	56.6604	184.475	34.6885
CAG	C17	Shade	11	12.71	3.468	1.01	86.7577	72.3804	318.165	55.4945
CAG	C17	Sun	1	10.719	3.662	0.995	64.0705	52.39	183.1	57.5145
CAG	C17	Sun	2	9.378	2.995	0.914	62.3537	50.5825	180.422	49.6739
CAG	C17	Sun	3	6.554	2.504	0.719	54.0313	42.5032	210.42	34.2381
CAG	C17	Sun	4	7.527	3.04	0.677	63.412	52.2708	201.325	66.3725
CAG	C17	Sun	5	20.318	5.272	0.755	81.6312	69.1794	160.732	62.9167
CAG	C17	Sun	6	15.067	5.271	0.836	89.1011	72.5771	195.222	72.6957
CAG	C17	Sun	7	8.827	3.019	0.68	65.4337	54.2532	194.774	55.2846
CAG	C17	Sun	8	8.998	3.29	0.686	75.1085	61.5038	197.006	70
CAG	C17	Sun	9	9.413	3.848	0.665	82.1379	67.5251	231.807	81.0976
CAG	C17	Sun	10	9.952	3.448	0.921	55.0747	44.4882	175.918	39.359
CAG	C17	Sun	11	11.113	2.603	1.236	56.4112	43.1238	139.946	29.3587
CAG	C18	Shade	1	17.124	3.624	0.918	65.9376	57.1181	151	57.0186
CAG	C18	Shade	2	13.045	3.333	1.253	67.8015	56.4474	162.585	68.8462
CAG	C18	Shade	3	9.376	3.281	0.949	65.5664	54.6069	201.288	76.5323
CAG	C18	Shade	4	12.703	3.491	1.001	56.8113	49.0653	161.62	73.0657
CAG	C18	Shade	5	9.678	3.578	0.505	63.9234	54.5239	190.319	69.1781
CAG	C18	Shade	6	12.106	2.943	1.045	69.5348	59.6649	187.452	79.771
CAG	C18	Shade	7	12.826	3.376	0.794	73.8825	62.5659	179.574	63.0159
CAG	C18	Shade	8	9.77	2.474	0.971	62.6684	53.5636	186.015	73.5606
CAG	C18	Shade	9	10.777	3.238	0.71	56.6316	48.7868	195.06	50.7143
CAG	C18	Shade	10	8.291	2.707	0.811	62.3853	53.1134	213.15	77.2381
CAG	C18	Shade	11	11.126	3.563	1.039	73.2938	57.7674	149.079	61.4793
CAG	C18	Sun	1	8.787	3.048	0.252	61.4906	53.384	211.667	34.5205
CAG	C18	Sun	2	12.011	2.428	0.661	49.7968	43.9641	135.642	46.8794
CAG	C18	Sun	3	10.237	3.079	0.641	50.4037	24.5904	252.377	3.18905
CAG	C18	Sun	4	6.569	1.972	0.558	55.8588	47.9489	193.333	60.6522
CAG	C18	Sun	5	7.547	2.84	0.263	61.4577	53.1853	213.534	45.3448
CAG	C18	Sun	6	13.888	3.608	0.623	51.6475	44.8579	135.131	44.5
CAG	C18	Sun	7	12.468	2.752	0.758	56.7243	48.6271	128.598	49.8684
CAG	C18	Sun	8	10.578	2.399	0.825	48.8591	42.5161	141.118	53.9216
CAG	C18	Sun	9	11.374	3.402	0.701	58.3282	49.3449	146.009	57.459
CAG	C18	Sun	10	8.36	2.39	0.414	57.0648	49.1476	150.314	53.7662
CAG	C18	Sun	11	13.958	3.316	0.499	56.8322	49.7434	135.347	47.5238
CAG	C19	Shade	1	11.08	3.81	0.796	71.0256	57.8892	200.526	48.5366
CAG	C19	Shade	2	8.755	2.746	1.44	74.1321	60.1718	230.756	92.9032
CAG	C19	Shade	3	14.21	4.81	2.071	61.0657	44.3231	163.051	35.4623
CAG	C19	Shade	4	8.003	3.215	0.917	64.3328	53.2468	238.148	73.9516
CAG	C19	Shade	5	7.21	2.509	1.477	68.0831	52.4745	258.66	67.7523
CAG	C19	Shade	6	5.582	2.032	0.798	66.7703	56.1005	270.933	95
CAG	C19	Shade	7	9.142	2.95	1.431	66.8764	50.8171	186.709	52.2263
CAG	C19	Shade	8	6.331	2.429	0.901	71.5367	59.8393	250.412	118.553
CAG	C19	Shade	9	9.392	2.714	1.647	72.3575	55.9714	233.966	62.3864
CAG	C19	Shade	10	10.044	3.23	1.143	37.6321	33.1376	183.523	61.4516
CAG	C19	Shade	11	10.246	3.67	0.7	78.9368	65.9755	226.543	75.2688
CAG	C19	Sun	1	11.015	3.557	0.812	65.4097	54.9377	209.235	53.7748
CAG	C19	Sun	2	8.321	3.4	0.751	66.8891	54.4212	209.877	61.0569
CAG	C19	Sun	3	9.658	3.955	1.704	64.0451	48.1216	213.784	54.2675
CAG	C19	Sun	4	16.055	5.047	1.033	65.2908	53.0744	167.119	39.1288
CAG	C19	Sun	5	8.253	3.447	0.738	74.0844	60.1092	271.417	55.9091
CAG	C19	Sun	6	12.061	3.922	1.389	69.4358	54.4515	188.558	51.4444
CAG	C19	Sun	7	8.52	3.364	1.305	66.1491	51.1405	236.901	55.2966
CAG	C19	Sun	8	10.898	3.94	0.949	75.2105	60.7469	235.928	53.3146
CAG	C19	Sun	9	9.185	3.595	0.793	72.2659	58.916	242.905	56.6429
CAG	C19	Sun	10	7.795	3.078	0.483	80.1955	68.4372	295.962	76.6667
CAG	C19	Sun	11	17.366	4.391	0.692	79.4783	68.6403	186.851	62.9091
CAG	C20	Shade	1	19.109	6.133	0.877	71.1695	60.4907	188.129	59.2568
CAG	C20	Shade	2	11.834	3.594	1.207	67.739	55.1188	199.667	54.8636
CAG	C20	Shade	3	11.432	4.472	1.428	62.6754	50.6962	218.146	63.1858
CAG	C20	Shade	4	17.777	5.182	1.19	70.8812	59.4747	191.926	56.3981
CAG	C20	Shade	5	11.565	3.5	1.239	61.8449	50.0433	200	46.5789
CAG	C20	Shade	6	14.13	4.777	0.898	85.4293	70.8271	230.773	67.0149
CAG	C20	Shade	7	13.619	4.195	0.984	77.4247	64.6983	210.804	66.9388
CAG	C20	Shade	8	13.652	4.722	0.936	68.1918	57.6034	202.661	69.3333
CAG	C20	Shade	9	10.667	4.342	0.929	80.3238	64.5312	222.667	71.4615
CAG	C20	Shade	10	10.834	4.605	0.827	81.3974	67.9674	253.022	102.099
CAG	C20	Shade	11	14.197	4.251	1.324	71.4854	58.8111	177.866	70.0529
CAG	C20	Sun	1	13.913	5.147	1.685	57.0673	42.7303	159.845	33.9718
CAG	C20	Sun	2	9.608	3.793	0.979	61.3538	50.8091	224.438	62.7564
CAG	C20	Sun	3	16.845	5.577	1.059	56.8896	47.2378	153.636	43.7603
CAG	C20	Sun	4	8.447	3.67	1.575	52.9261	38.291	202.762	36.7133
CAG	C20	Sun	5	19.408	4.506	1.191	56.8316	44.6161	128.011	20.4288
CAG	C20	Sun	6	11.25	4.389	1.508	58.8697	46.4109	165	61.0526
CAG	C20	Sun	7	6.661	3.132	1.023	62.2523	48.7985	250.56	60.1765
CAG	C20	Sun	8	7.686	3.445	1.371	58.1832	40.9701	218.038	34.534
CAG	C20	Sun	9	10.338	3.553	2.422	55.136	38.7481	223.459	38.2019
CAG	C20	Sun	10	12.35	5.065	1.078	60.5986	48.5838	207.582	41.4615
CAG	C20	Sun	11	8.613	3.639	1.636	53.8986	37.8927	189.531	33.8716
BHZ	B1	Shade	1	11.863	5.992	2.689	75.8989	58.6987	257.167	119.511
BHZ	B1	Shade	2	7.999	5.748	1.692	82.549	62.3947	315.824	129.16
BHZ	B1	Shade	3	19.501	6.462	2.119	69.796	58.1079	203.849	86.4898
BHZ	B1	Shade	4	11.657	4.519	2.049	64.1199	52.11	229.391	92.2973
BHZ	B1	Shade	5	10.149	5.755	1.298	93.453	75.5134	342.56	144.222
BHZ	B1	Shade	6	11.488	5.795	1.586	87.6278	68.2753	306.614	86.8565
BHZ	B1	Shade	7	15.974	7.253	1.577	78.884	65.2533	259.036	110.28
BHZ	B1	Shade	8	18.512	5.266	3.435	70.1744	56.6463	197.228	94.6281
BHZ	B1	Shade	9	11.565	7.027	2.676	68.5943	53.0505	275.569	111.967
BHZ	B1	Shade	10	15.214	6.189	1.209	102.52	84.8996	283.899	134.333
BHZ	B1	Shade	11	7.81	3.632	1.87	79.3699	63.4959	352.621	130.769
BHZ	B1	Sun	1	13.287	6.183	1.99	64.0029	52.5178	279.774	85.4077
BHZ	B1	Sun	2	17.306	6.511	1.834	68.2952	56.4081	223.746	75.4733
BHZ	B1	Sun	3	14.578	6.084	1.223	68.8291	58.7349	270.4	87.9856
BHZ	B1	Sun	4	14.622	5.515	2.105	69.0042	55.7241	255.324	72.8374
BHZ	B1	Sun	5	10.165	4.34	1.283	79.6006	66.875	310	124.563
BHZ	B1	Sun	6	13.038	4.16	1.895	70.705	58.7033	236.364	94.2786
BHZ	B1	Sun	7	11.659	5.141	1.506	77.1608	65.9819	333.831	147.647
BHZ	B1	Sun	8	9.191	4.054	1.95	74.6629	60.7067	309.466	128.289
BHZ	B1	Sun	9	15.429	5.63	0.836	72.0308	63.9147	291.71	105.823
BHZ	B1	Sun	10	17.085	6.478	1.752	89.0772	74.1536	285.374	110.189
BHZ	B1	Sun	11	9.86	4.171	1.704	96.2891	76.9711	328.425	131.077
BHZ	B2	Shade	1	21.331	4.169	1.039	84.5462	73.0764	176.653	64.9375
BHZ	B2	Shade	2	13.089	3.347	1.559	84.0116	61.0779	147.445	43.5475
BHZ	B2	Shade	3	19.993	3.87	1.443	71.2255	59.6806	150.584	50.4545
BHZ	B2	Shade	4	19.017	3.81	1.196	70.906	61.3848	158.75	67.9545
BHZ	B2	Shade	5	18.68	3.797	1.246	68.6008	58.7606	160.211	56.895
BHZ	B2	Shade	6	18.726	3.739	0.757	83.7852	72.6941	166.92	64.7009
BHZ	B2	Shade	7	14.108	2.978	0.994	77.5165	67.3092	201.216	77.6562
BHZ	B2	Shade	8	9.257	3.29	0.805	71.8154	58.9994	206.918	66.5289
BHZ	B2	Shade	9	17.342	3.763	1.109	73.733	62.9931	169.505	61.9553
BHZ	B2	Shade	10	15.716	3.433	1.135	80.4299	70.2234	218.662	89.3701
BHZ	B2	Shade	11	15.891	3.568	1.216	88.8262	74.8869	209.882	74.6012
BHZ	B2	Sun	1	18.886	4.008	1.313	57.265	48.3389	133.156	42.6299
BHZ	B2	Sun	2	14.007	3.761	1.654	55.1674	44.5515	160.726	44.5822
BHZ	B2	Sun	3	14.107	3.989	1.485	54.7845	44.2087	138.507	45.2744
BHZ	B2	Sun	4	17.572	3.728	1.455	59.5459	50.3207	160	47.2403
BHZ	B2	Sun	5	14.102	3.715	1.003	58.2727	48.8974	168.1	41.2757
BHZ	B2	Sun	6	15.509	4.146	1.14	60.1824	50.7493	159.462	52.0548
BHZ	B2	Sun	7	12.088	3.579	0.841	59.7824	51.9467	203.352	65.1938
BHZ	B2	Sun	8	18.375	4.4	2.386	57.7467	45.7317	137.931	46.1509
BHZ	B2	Sun	9	22.392	3.589	0.525	63.8131	57.3125	126.373	46.0526
BHZ	B2	Sun	10	14.625	3.893	1.355	67.0872	57.1736	186.268	80.1775
BHZ	B2	Sun	11	14.805	2.79	2.272	54.2904	42.2156	146.842	38.5085
BHZ	B3	Shade	1	11.399	3.239	1.446	64.6935	52.8465	191.657	63.9823
BHZ	B3	Shade	2	12.75	3.572	1.359	67.8191	57.047	196.264	78.5549
BHZ	B3	Shade	3	11.581	3.397	1.217	65.9886	55.0428	179.735	76.0625
BHZ	B3	Shade	4	14.439	3.529	1.835	72.998	59.7146	178.232	75.8264
BHZ	B3	Shade	5	8.398	2.572	1.386	68.6672	56.024	249.709	80.1156
BHZ	B3	Shade	6	11.559	4.524	0.94	76.0961	63.3717	239.365	81.0345
BHZ	B3	Shade	7	12.799	3.857	1.522	62.3429	51.6297	192.85	67.3451
BHZ	B3	Shade	8	9.174	2.905	1.455	64.1987	53.6178	234.274	92.0886
BHZ	B3	Shade	9	9.506	3.127	1.252	68.6354	57.9281	281.712	86.3448
BHZ	B3	Shade	10	9.891	3.271	1.495	73.7034	60.6066	240.515	97.0779
BHZ	B3	Shade	11	10.526	3.429	1.888	71.8498	57.0824	212.981	86.6055
BHZ	B3	Sun	1	5.834	3.281	0.572	65.1844	54.1187	256.328	104
BHZ	B3	Sun	2	8.676	3.184	0.88	54.2929	44.5151	184.046	49.4382
BHZ	B3	Sun	3	7.462	4.05	0.69	67.2858	56.7452	289.286	104.545
BHZ	B3	Sun	4	6.579	3.171	0.856	57.8628	48.5535	278.158	82.3077
BHZ	B3	Sun	5	7.256	3.049	0.764	64.9597	54.4745	234.538	89.8824
BHZ	B3	Sun	6	4.9	2.553	1.055	56.5167	45.2447	271.596	86.4754
BHZ	B3	Sun	7	8.915	4.233	0.704	70.0314	58.9227	253.473	96.4384
BHZ	B3	Sun	8	7.637	2.935	1.366	44.9235	37.3813	215.809	65.9903
BHZ	B3	Sun	9	5.79	2.538	1.496	53.6608	41.2981	222.632	71.5789
BHZ	B3	Sun	10	6.507	2.482	1.416	53.7325	38.5943	178.561	42.1429
BHZ	B3	Sun	11	9.308	3.3	1.207	65.7345	52.1165	208.861	56.934
BHZ	B4	Shade	1	16.686	3.568	1.241	83.2635	73.1842	276.589	84.4218
BHZ	B4	Shade	2	27.294	3.966	1.038	80.8472	74.1886	325.082	57.3481
BHZ	B4	Shade	3	15.886	4.127	0.626	85.1796	74.3379	208.434	84.5946
BHZ	B4	Shade	4	14.106	2.84	1.181	71.7863	61.4105	167.059	72.9012
BHZ	B4	Shade	5	21.223	3.558	1.238	74.6763	64.6451	154.026	58.9524
BHZ	B4	Shade	6	21.325	3.594	1.306	73.2818	64.2513	174.466	64.335
BHZ	B4	Shade	7	24.985	4.209	1.303	73.5069	63.2212	140.769	51.2992
BHZ	B4	Shade	8	17.454	3.846	1.175	91.1912	78.728	213.667	95.5285
BHZ	B4	Shade	9	22.283	3.058	1.3	69.4174	61.066	137.748	59.9078
BHZ	B4	Shade	10	19.56	2.994	1.014	79.3831	69.9821	170.114	65.4194
BHZ	B4	Shade	11	22.178	4.026	0.782	91.7964	80.1518	187.256	57.5
BHZ	B4	Sun	1	8.337	2.956	1.156	56.6757	48.2186	227.385	90.3125
BHZ	B4	Sun	2	11.682	3.848	1.322	56.2175	47.2573	172.556	77.3099
BHZ	B4	Sun	3	6.189	3.304	0.896	57.3056	48.0886	264.32	109.268
BHZ	B4	Sun	4	12.594	2.861	0.977	46.2335	41.0495	163.486	57.8107
BHZ	B4	Sun	5	14.866	3.793	0.931	62.1229	54.5541	190.603	70
BHZ	B4	Sun	6	14.635	3.158	1.393	50.0342	43.4402	147.57	60.5652
BHZ	B4	Sun	7	13.507	2.444	1.226	46.9645	41.6112	144.615	60.995
BHZ	B4	Sun	8	10.497	3.12	1.22	52.6958	45.5007	196.226	78.2051
BHZ	B4	Sun	9	10.689	2.863	1.482	51.0702	42.8933	159.944	67.3636
BHZ	B4	Sun	10	9.517	3.703	1.081	52.931	45.4924	225.793	83.1538
BHZ	B4	Sun	11	10.981	3.69	1.503	55.7978	47.048	200.543	82.5824
BHZ	B5	Shade	1	17.228	2.317	1.331	77.7086	65.4559	87.7652	88.1457
BHZ	B5	Shade	2	8.692	3.705	1.714	83.9807	70.8394	327.876	216.962
BHZ	B5	Shade	3	19.222	3.479	1.453	72.6455	59.975	102.929	65.7466
BHZ	B5	Shade	4	19.972	3.581	1.793	75.3092	64.7601	114.776	149.417
BHZ	B5	Shade	5	19.395	3.203	2.092	72.3424	60.2891	99.1641	98.216
BHZ	B5	Shade	6	15.373	3.852	1.359	72.72	61.3203	154.08	95.035
BHZ	B5	Shade	7	12.287	4.172	1.329	77.5205	64.5665	251.325	87.4342
BHZ	B5	Shade	8	14.679	3.076	1.28	81.4143	68.9479	155.354	100
BHZ	B5	Shade	9	15.144	3.468	1.282	74.8961	62.9165	136	98.6154
BHZ	B5	Shade	10	12.822	3.221	0.957	85.2527	71.7114	186.185	86.2162
BHZ	B5	Shade	11	21.062	3.715	1.31	100.343	85.4096	158.761	98.4962
BHZ	B5	Sun	1	10.528	3.183	1.463	58.4889	47.3594	175.856	60.4545
BHZ	B5	Sun	2	10.938	3.724	1.507	65.0297	51.5943	194.974	61.0121
BHZ	B5	Sun	3	12.899	4.384	1.214	58.7922	47.3532	178.939	42.5965
BHZ	B5	Sun	4	14.337	4.228	0.699	66.3443	55.4837	165.156	41.8563
BHZ	B5	Sun	5	17.445	4.741	1.631	76.3457	63.0238	195.909	67.6763
BHZ	B5	Sun	6	14.162	2.833	1.63	61.7619	48.1046	153.967	34.9036
BHZ	B5	Sun	7	10.235	2.782	0.896	80.7814	69.7682	235.763	109.268
BHZ	B5	Sun	8	12.713	3.259	1.287	75.5826	63.2488	204.969	76.1538
BHZ	B5	Sun	9	15.107	4.799	1.101	71.0249	58.5543	181.78	58.254
BHZ	B5	Sun	10	11.756	2.895	1.732	67.7189	52.3653	186.774	48.9266
BHZ	B5	Sun	11	12.512	3.091	1.356	65.8873	53.1295	168.907	49.6703
BHZ	B6	Shade	1	18.781	3.367	1.406	80.7785	69.8438	185	77.2527
BHZ	B6	Shade	2	14.772	4.416	1.065	71.8482	61.2692	216.471	70.5298
BHZ	B6	Shade	3	9.782	3.606	0.849	70.6282	60.0123	259.424	80.0943
BHZ	B6	Shade	4	11.072	2.731	0.927	88.7891	76.6759	329.036	81.3158
BHZ	B6	Shade	5	13.901	3.044	1.111	87.263	75.59	262.414	85.4615
BHZ	B6	Shade	6	10.761	3.635	0.949	73.3038	62.3826	271.269	77.1545
BHZ	B6	Shade	7	12.19	2.8	1.064	73.0815	62.5449	224	68.2051
BHZ	B6	Shade	8	15.749	4.57	0.752	86.7713	75.972	249.727	100.267
BHZ	B6	Shade	9	9.44	2.367	0.943	80.4774	68.9554	244.021	95.2525
BHZ	B6	Shade	10	12.116	2.735	1.079	80.2384	71.905	255.607	158.676
BHZ	B6	Shade	11	14.484	3.255	1.322	85.3004	72.9673	237.591	88.1333
BHZ	B6	Sun	1	12.131	3.13	1.192	60.807	52.6748	196.855	80
BHZ	B6	Sun	2	12.961	2.913	1.241	72.1258	66.2967	242.75	326.579
BHZ	B6	Sun	3	15.405	3.695	1.495	61.9172	56.6569	302.869	137.156
BHZ	B6	Sun	4	14.583	3.511	1.11	61.3246	54.1716	199.489	80.4348
BHZ	B6	Sun	5	12.668	4.282	1.15	66.2552	55.88	253.373	61.828
BHZ	B6	Sun	6	13.466	3.229	1.134	64.8651	58.0681	235.693	106.981
BHZ	B6	Sun	7	13.033	3.317	1.633	71.6887	59.9218	197.44	86.4021
BHZ	B6	Sun	8	12.594	3.006	1.561	63.8317	52.4313	171.771	61.4567
BHZ	B6	Sun	9	11.619	4.484	1.422	65.8673	54.4726	242.378	77.2826
BHZ	B6	Sun	10	9.64	3.22	1.12	73.2523	60.5908	240.299	79.4326
BHZ	B6	Sun	11	14.386	3.129	1.273	69.6996	60.8288	196.792	89.6479
BHZ	B7	Shade	1	13.251	2.774	1.056	69.377	61.1773	198.143	91.0345
BHZ	B7	Shade	2	15.94	4.147	0.965	64.8759	57.6075	188.5	107.222
BHZ	B7	Shade	3	27.73	3.492	1.115	66.5467	59.8145	112.645	70.1258
BHZ	B7	Shade	4	13.515	3.913	1.474	63.4805	55.3213	223.6	106.043
BHZ	B7	Shade	5	25.96	4.057	1.241	70.755	62.8571	133.016	79.5513
BHZ	B7	Shade	6	17.062	4.088	1.976	77.8376	67.2262	234.943	114.884
BHZ	B7	Shade	7	14.987	2.68	1.759	73.6462	64.6828	198.519	119.66
BHZ	B7	Shade	8	11.661	2.405	1.865	68.0338	59.1329	231.25	121.104
BHZ	B7	Shade	9	14.505	2.749	1.688	69.1043	60.9198	231.008	103.558
BHZ	B7	Shade	10	26.37	4.335	2.203	73.25	64.2231	159.963	93.7447
BHZ	B7	Shade	11	19.628	3.988	1.084	73.4581	65.4703	177.244	107.327
BHZ	B7	Sun	1	11.732	2.324	1.337	68.7288	59.9183	237.143	87.3856
BHZ	B7	Sun	2	18.958	3.695	1.651	59.6914	52.0681	165.695	68.2231
BHZ	B7	Sun	3	16.206	3.481	1.509	63.0093	54.6946	168.164	82.0109
BHZ	B7	Sun	4	18.156	3.612	1.707	57.9508	50.2936	143.904	75.531
BHZ	B7	Sun	5	17.968	3.253	2.073	60.2751	51.9306	147.864	80.0386
BHZ	B7	Sun	6	21.024	3.868	1.429	61.7989	53.5371	136.197	59.2946
BHZ	B7	Sun	7	22.855	4.179	1.346	61.6536	54.2488	142.143	63.4906
BHZ	B7	Sun	8	10.04	3.084	1.336	59.0936	51.2506	259.16	94.7518
BHZ	B7	Sun	9	14.379	3.507	1.318	65.9587	58.4037	217.826	108.926
BHZ	B7	Sun	10	11.169	3.278	0.927	71.2309	63.2805	248.333	142.615
BHZ	B7	Sun	11	18.487	3.715	1.386	78.7351	69.1879	183.911	113.607
BHZ	B8	Shade	1	18.459	5.152	1.964	76.0882	66.4471	239.628	143.358
BHZ	B8	Shade	2	29.397	6.418	2.351	73.9733	63.7679	168.451	92.1961
BHZ	B8	Shade	3	24.227	6.534	1.518	75.7094	65.9597	210.096	93.7037
BHZ	B8	Shade	4	19.629	4.22	2.317	78.9899	69.0433	238.418	128.011
BHZ	B8	Shade	5	29.023	6.197	3.157	82.3348	70.1039	201.857	102.5
BHZ	B8	Shade	6	27.024	6.975	1.247	89.5724	78.8331	227.941	118.762
BHZ	B8	Shade	7	24.602	5.827	1.234	79.9285	70.6954	220.72	89.4203
BHZ	B8	Shade	8	23.614	5.983	2.111	72.2141	62.6366	217.564	93.8222
BHZ	B8	Shade	9	19.144	6.907	2.504	87.5354	72.9018	261.629	143.086
BHZ	B8	Shade	10	18.751	5.053	2.921	98.4304	80.7885	239.479	142.488
BHZ	B8	Shade	11	21.569	4.528	1.775	89.3126	78.9206	244.757	133.459
BHZ	B8	Sun	1	14.224	4.92	0.818	82.2672	72.5344	296.386	123.939
BHZ	B8	Sun	2	15.979	3.856	1.939	71.2394	61.9581	209.565	127.566
BHZ	B8	Sun	3	13.709	5.079	1.436	77.2773	67.9673	465.963	107.164
BHZ	B8	Sun	4	15.59	5.243	1.845	83.0581	70.4155	275.947	125.51
BHZ	B8	Sun	5	16.667	4.088	2.025	66.8016	57.3933	190.14	104.381
BHZ	B8	Sun	6	17.2	5.331	0.855	90.0052	78.6825	260.049	122.143
BHZ	B8	Sun	7	12.327	3.456	2.655	74.7998	61.237	240	120.136
BHZ	B8	Sun	8	21.946	5.316	4.128	73.5456	59.5065	185.226	98.9928
BHZ	B8	Sun	9	13.963	4.742	1.453	79.3803	69.4677	324.795	138.381
BHZ	B8	Sun	10	13.124	4.645	1.211	87.6687	77.565	346.642	198.525
BHZ	B8	Sun	11	20.593	4.412	2.789	81.6534	69.6651	206.168	126.773
BHZ	B9	Shade	1	16.183	4.686	1.055	67.4854	56.9423	153.137	76.4493
BHZ	B9	Shade	2	10.787	2.907	0.987	63.3412	54.4798	176.182	88.125
BHZ	B9	Shade	3	14.483	3.558	1.494	62.6427	52.6655	153.362	72.5243
BHZ	B9	Shade	4	14.133	4.702	0.76	59.3574	50.475	161.581	59.375
BHZ	B9	Shade	5	7.555	2.495	0.855	66.6226	56.5918	220.796	97.1591
BHZ	B9	Shade	6	9.4	3.779	0.516	69.9926	59.5313	219.709	80.625
BHZ	B9	Shade	7	9.152	3.579	0.862	71.0008	59.6999	227.962	99.0805
BHZ	B9	Shade	8	14.477	4.302	1.348	65.6256	55.2557	167.393	85.8599
BHZ	B9	Shade	9	11.151	3.08	1.079	73.4585	62.4706	196.178	98.0909
BHZ	B9	Shade	10	12.229	3.112	1.105	71.3477	61.4214	190.92	96.9298
BHZ	B9	Shade	11	10.613	3.571	0.678	71.7095	61.7394	212.56	95.493
BHZ	B9	Sun	1	9.133	3.271	1.229	49.8798	41.4948	152.85	78.7821
BHZ	B9	Sun	2	11.292	4.49	1.336	54.0546	44.1611	162.681	69.5833
BHZ	B9	Sun	3	9.801	4.291	1.459	49.0786	38.2852	163.156	48.6333
BHZ	B9	Sun	4	8.498	2.686	1.171	45.5169	37.9375	151.751	59.7449
BHZ	B9	Sun	5	12.872	4.528	1.495	50.0467	41.5762	154.014	65
BHZ	B9	Sun	6	10.886	4.097	0.824	56.4334	47.351	161.937	70.4274
BHZ	B9	Sun	7	8.787	3.225	1.429	52.6799	43.1794	180.168	76.0106
BHZ	B9	Sun	8	12.389	4.494	1.423	55.907	46.0386	159.362	73.7306
BHZ	B9	Sun	9	10.937	2.826	1.475	47.1829	39.0607	135.865	53.8321
BHZ	B9	Sun	10	9.818	4.016	0.771	56.6859	47.5909	185.926	67.0435
BHZ	B9	Sun	11	9.183	4.575	0.853	64.1271	52.3248	215.802	76.8468
BHZ	B10	Shade	1	25.57	4.261	1.861	94.7739	78.5561	145.925	70.2264
BHZ	B10	Shade	2	27.641	4.19	0.912	96.0758	83.5833	142.517	67.0588
BHZ	B10	Shade	3	29.66	4.574	1.607	91.1214	77.4008	134.135	68.0932
BHZ	B10	Shade	4	16.823	3.911	1.702	103.974	86.2718	226.069	107.044
BHZ	B10	Shade	5	22.302	4.33	1.515	108.42	90.0727	179.668	85.1124
BHZ	B10	Shade	6	32.542	5.244	2.856	111.522	91.1285	174.8	80.9065
BHZ	B10	Shade	7	26.425	4.672	2.043	110.657	93.013	196.303	95.0233
BHZ	B10	Shade	8	22.519	4.21	1.312	84.4674	72.1763	162.548	67.2821
BHZ	B10	Shade	9	32.101	4.906	1.849	103.318	88.6768	180.368	76.722
BHZ	B10	Shade	10	23.654	4.082	1.24	103.383	88.858	194.381	75.6098
BHZ	B10	Shade	11	31.816	5.366	2.362	116.756	96.4998	193.022	80.3401
BHZ	B10	Sun	1	12.59	3.661	1.943	72.3148	57.8053	192.684	78.664
BHZ	B10	Sun	2	14.172	4.447	1.525	80.5685	64.8604	175.079	88.6628
BHZ	B10	Sun	3	14.211	4.029	1.762	74.4421	60.0127	196.537	69.3701
BHZ	B10	Sun	4	15.6	4.177	0.687	77.2277	65.8506	184.009	56.3115
BHZ	B10	Sun	5	18.848	4.433	1.15	111.593	95.3364	257.733	99.1379
BHZ	B10	Sun	6	14.507	4.039	1.067	95.378	81.2262	265.724	94.4248
BHZ	B10	Sun	7	22.772	4.635	2.241	83.567	69.1738	179.651	72.5243
BHZ	B10	Sun	8	13.034	3.627	1.598	85.6936	70.9913	250.138	94
BHZ	B10	Sun	9	24.542	5.176	2.081	75.6302	63.4324	153.591	72.5087
BHZ	B10	Sun	10	22.498	5.133	1.479	94.7683	78.9681	171.672	84.0341
BHZ	B10	Sun	11	14.729	3.876	1.427	86.8455	73.498	221.486	107.293
BHZ	B11	Shade	1	24.362	4.755	1.324	77.3151	65.5069	153.883	51.1197
BHZ	B11	Shade	2	17.076	4.551	1.438	74.4701	62.1171	202.267	62.2511
BHZ	B11	Shade	3	23.096	4.796	0.991	92.6063	78.8259	159.867	72.8676
BHZ	B11	Shade	4	17.655	4.191	1.053	86.9704	74.8728	211.667	81
BHZ	B11	Shade	5	19.576	4.478	1.3	90.5039	76.0233	188.151	74.7126
BHZ	B11	Shade	6	22.56	4.707	0.981	111.133	92.916	192.122	64.1176
BHZ	B11	Shade	7	15.977	4.351	1.417	84.6688	71.2305	213.284	93.2237
BHZ	B11	Shade	8	19.568	4.824	1.519	86.8917	73.0695	210.655	77.1066
BHZ	B11	Shade	9	11.595	3.911	1.108	89.1923	75.7843	307.953	107.573
BHZ	B11	Shade	10	22.073	4.503	0.733	108.148	94.8968	204.682	112.769
BHZ	B11	Shade	11	12.198	3.092	1.215	91.5079	77.1537	253.443	96.4286
BHZ	B11	Sun	1	19.838	4.659	2.012	62.6991	51.648	139.491	58.6589
BHZ	B11	Sun	2	16.446	4.273	2.008	61.6186	49.7008	148.885	56.8839
BHZ	B11	Sun	3	14.32	4.327	0.864	73.8144	62.4237	203.146	61.2766
BHZ	B11	Sun	4	19.021	4.468	1.186	76.0536	65.4317	193.42	67.7714
BHZ	B11	Sun	5	25.942	4.818	0.729	207.869	152.96	146.89	60.75
BHZ	B11	Sun	6	15.515	4.902	1.54	69.7303	57.8918	210.386	69.3694
BHZ	B11	Sun	7	19.296	4.546	0.705	84.0052	73.8462	215.45	67.1429
BHZ	B11	Sun	8	24.634	5.334	1.243	74.4455	63.3917	154.609	53.5776
BHZ	B11	Sun	9	19.089	4.6	1.576	75.1831	63.6937	191.667	72.2936
BHZ	B11	Sun	10	25.426	5.072	2.279	70.9827	58.8292	147.014	57.6962
BHZ	B11	Sun	11	18.662	4.728	1.887	75.6772	63.2825	189.12	80.9871
BHZ	B12	Shade	1	23.61	5.332	0.926	62.4273	53.5982	119.552	52.3164
BHZ	B12	Shade	2	24.19	5.07	1.095	59.5373	50.4484	122.169	34.5426
BHZ	B12	Shade	3	14.403	4.295	0.838	70.7417	60.1629	169.763	79.8095
BHZ	B12	Shade	4	19.783	5.032	1.518	59.1067	48.9073	124.247	51.8089
BHZ	B12	Shade	5	20.659	4.978	1.537	65.814	54.7403	144.709	52.8179
BHZ	B12	Shade	6	17.425	5.33	1.35	63.4098	52.1238	139.164	63.6792
BHZ	B12	Shade	7	19.733	5.13	0.974	74.6331	64.089	167.647	75.5039
BHZ	B12	Shade	8	22.004	4.884	0.796	66.2971	57.7836	141.565	55.2778
BHZ	B12	Shade	9	34.331	5.682	0.93	74.39	64.8489	114.326	51.0989
BHZ	B12	Shade	10	28.454	6.932	1.136	67.5867	57.2861	132.797	48.3404
BHZ	B12	Shade	11	22.209	4.699	0.716	74.5268	64.5423	149.65	48.7075
BHZ	B12	Sun	1	11.228	4.982	1.809	44.4849	34.7509	142.751	50.5307
BHZ	B12	Sun	2	17.523	5.595	1.525	48.1269	38.7163	129.514	33.6645
BHZ	B12	Sun	3	12.858	5.05	1.99	44.8483	35.1888	137.602	47.381
BHZ	B12	Sun	4	17.926	4.997	2.338	41.669	33.4503	110.798	38.5809
BHZ	B12	Sun	5	21.131	5.902	3.287	44.7786	31.6332	105.018	23.4954
BHZ	B12	Sun	6	24.042	6.365	0.943	55.7431	48.19	128.846	51.8132
BHZ	B12	Sun	7	18.685	5.027	1.485	53.0071	43.2123	103.012	47.7492
BHZ	B12	Sun	8	5.848	3.407	1.688	62.3454	42.6239	254.254	56.2667
BHZ	B12	Sun	9	20.311	5.627	1.571	48.5561	40.4119	110.986	46.756
BHZ	B12	Sun	10	15.993	5.219	1.82	47.5134	39.1027	140.296	51.7045
BHZ	B12	Sun	11	8.771	4.028	2.127	52.3329	39.2614	174.372	65.0459
PAP	P1	Shade	1	15.365	1.97	1.308	62.6887	56.1792	145.926	87.7852
PAP	P1	Shade	2	23.989	2.991	1.595	66.1036	56.7518	125.146	44.429
PAP	P1	Shade	3	35.152	4.647	0.724	81.2012	73.3403	130.168	67.6636
PAP	P1	Shade	4	31.465	4.88	0.999	80.8453	71.3978	131.536	69.375
PAP	P1	Shade	5	28.318	3.503	1.915	72.4431	63.3512	133.702	64.0468
PAP	P1	Shade	6	43.553	4.94	1.187	76.7724	69.2306	115.691	62.1466
PAP	P1	Shade	7	18.977	2.786	1.627	71.7738	60.9213	165.833	53.6964
PAP	P1	Shade	8	33.184	4.953	1.142	79.5589	70.0084	129.66	61.0695
PAP	P1	Shade	9	36.634	4.941	1.142	66.9481	60.2038	127.018	50.9821
PAP	P1	Shade	10	19.568	2.804	1.525	65.2702	57.7909	144.536	78.6082
PAP	P1	Shade	11	29.817	4.695	0.772	87.1842	77.8105	158.081	67.1304
PAP	P1	Sun	1	56.402	5.316	1.99	68.4241	58.7032	83.1925	27.4105
PAP	P1	Sun	2	31.382	3.147	1.672	76.6724	67.7943	116.989	62.6217
PAP	P1	Sun	3	28.594	4.48	1.233	81.7205	69.2181	129.855	42.9617
PAP	P1	Sun	4	25.743	4.492	0.882	83.0687	73.0505	145.844	75.3846
PAP	P1	Sun	5	33.413	3.69	1.729	68.7227	58.609	97.3615	37.587
PAP	P1	Sun	6	27.702	4.207	1.234	79.6492	69.7959	146.585	60.4902
PAP	P1	Sun	7	29.82	3.647	2.46	70.3468	58.0269	103.608	44.8905
PAP	P1	Sun	8	21.918	3.043	1.752	68.451	58.667	156.051	51.6814
PAP	P1	Sun	9	40.021	4.412	1.904	81.3104	68.9898	120.877	37.0428
PAP	P1	Sun	10	37.549	3.129	2.116	75.8872	66.7894	107.897	55.1042
PAP	P1	Sun	11	41.348	5.136	1.389	84.8338	74.0075	120	48.7368
PAP	P2	Shade	1	45.28	5.225	1.671	57.6595	50.8478	89.1638	35.8584
PAP	P2	Shade	2	10.479	3.847	0.78	61.9326	52.8175	201.414	77.2277
PAP	P2	Shade	3	24.153	3.91	0.594	61.9625	55.9356	130.333	49.5
PAP	P2	Shade	4	22.51	3.655	1.536	63.2126	55.6903	144.466	67.3684
PAP	P2	Shade	5	40.237	5.635	1.446	66.8611	59.4255	115.235	54.7727
PAP	P2	Shade	6	23.107	4.421	1.534	62.2495	53.3156	133.163	52.8966
PAP	P2	Shade	7	25.781	3.59	1.168	61.7509	55.3597	123.368	61.1518
PAP	P2	Shade	8	18.305	4.282	0.794	69.2322	60.2931	175.492	53.6486
PAP	P2	Shade	9	17.885	3.409	1.125	62.1007	54.9125	151.511	74.0132
PAP	P2	Shade	10	21.033	4.944	0.955	65.7487	56.7539	154.019	51.3441
PAP	P2	Shade	11	16.745	3.731	1.237	67.276	58.8991	183.793	81.9205
PAP	P2	Sun	1	31.331	4.764	1.235	50.6155	44.829	94.7117	41.723
PAP	P2	Sun	2	18.7	4.6	1.218	52.1037	43.7837	130.312	37.0213
PAP	P2	Sun	3	18.7	4.309	1.35	42.4036	37.5955	139.45	52.9412
PAP	P2	Sun	4	23.487	4.324	0.691	59.2956	53.102	135.549	48.3217
PAP	P2	Sun	5	22.562	2.986	1.078	49.5324	44.633	105.887	49.4495
PAP	P2	Sun	6	25.494	5.603	1.865	49.1403	41.0664	122.336	33.1851
PAP	P2	Sun	7	16.109	3.576	1.42	52.6782	46.1312	156.157	69.2683
PAP	P2	Sun	8	20.047	5.032	0.927	49.6336	43.2794	144.598	37.8367
PAP	P2	Sun	9	20.587	4.137	1.552	56.5732	46.9701	126.902	37.1292
PAP	P2	Sun	10	15.986	4.647	0.955	54.897	46.0957	145.219	40.4661
PAP	P2	Sun	11	14.431	4.202	0.94	51.7611	44.0776	162.239	41.4097
PAP	P3	Shade	1	39.966	4.954	2.273	74.066	61.8095	112.336	36.1367
PAP	P3	Shade	2	27.795	4.752	0.866	69.8191	59.903	132	28.9632
PAP	P3	Shade	3	23.908	3.61	1.84	75.8743	63.366	143.825	49.5957
PAP	P3	Shade	4	28.52	3.739	1.858	74.6401	63.5614	133.06	48.2597
PAP	P3	Shade	5	24.278	4.583	1.295	74.0635	62.5722	149.771	43.75
PAP	P3	Shade	6	31.573	5.397	1.239	79.6293	69.1329	146.26	53.176
PAP	P3	Shade	7	28.849	4.887	1.529	78.5862	65.6853	141.243	40.7733
PAP	P3	Shade	8	23.796	3.885	1.678	72.3723	62.228	153.557	59.2933
PAP	P3	Shade	9	24.617	3.558	2.197	80.1596	67.6105	156.053	64.2398
PAP	P3	Shade	10	40.451	3.764	2.566	79.3624	66.586	110.381	40.2826
PAP	P3	Shade	11	19.587	3.943	1.28	77.2054	66.1723	186.872	60.3774
PAP	P3	Sun	1	33.075	4.527	1.336	92.2852	80.4549	155.034	56.8511
PAP	P3	Sun	2	32.334	3.336	1.434	89.6175	78.3855	131.858	54.3182
PAP	P3	Sun	3	30.793	5.101	1.768	76.0885	62.183	134.237	33.6762
PAP	P3	Sun	4	23.001	2.767	1.499	75.5369	63.9094	138.35	42.3446
PAP	P3	Sun	5	24.963	4.651	0.605	79.8305	68.9015	152.492	31.6754
PAP	P3	Sun	6	33.555	5.383	1.333	92.2347	72.9774	131.936	24.1486
PAP	P3	Sun	7	32.356	4.75	1.045	84.7237	72.0624	129.076	34.4884
PAP	P3	Sun	8	54.288	7.463	1.684	94.0378	78.5189	126.492	30.5626
PAP	P3	Sun	9	26.691	5.466	1.234	83.6971	68.7912	147.332	38.5625
PAP	P3	Sun	10	24.57	4.123	1.058	87.8755	75.4607	173.966	47.4439
PAP	P3	Sun	11	36.987	5.661	1.824	80.8106	66.7394	130.739	34.2857
PAP	P4	Shade	1	17.141	3.981	1.305	66.3095	55.5804	159.88	52.2
PAP	P4	Shade	2	13.137	3.609	1.239	71.358	60.2062	192.995	80.4545
PAP	P4	Shade	3	12.964	4.337	0.828	74.6344	63.549	208.51	87.1579
PAP	P4	Shade	4	16.074	4.042	0.947	69.2845	59.9776	178.062	71.203
PAP	P4	Shade	5	20.473	4.55	1.158	65.1177	55.5727	145.367	51.0132
PAP	P4	Shade	6	20.473	4.856	0.835	109.481	94.3022	224.815	98.2353
PAP	P4	Shade	7	13.799	3.915	0.721	78.0486	67.2138	206.053	75.8947
PAP	P4	Shade	8	15.909	3.959	1.255	75.6851	63.7891	197.95	65.3646
PAP	P4	Shade	9	15.447	4.356	0.595	72.8976	62.5891	194.464	47.6
PAP	P4	Shade	10	19.349	4.098	0.556	85.3507	75.2879	178.174	76.1644
PAP	P4	Shade	11	17.882	5.027	1.057	84.1902	71.9308	213.008	83.8889
PAP	P4	Sun	1	11.927	3.424	1.125	74.3579	63.9517	231.351	99.5575
PAP	P4	Sun	2	14.554	4.384	1.196	66.4263	54.9622	200.183	50.2521
PAP	P4	Sun	3	11.843	3.664	0.461	87.2091	76.1118	252.69	86.9811
PAP	P4	Sun	4	10.055	2.887	0.948	70.9097	60.6088	223.798	84.6429
PAP	P4	Sun	5	12.252	3.6	0.696	34.4157	32.0649	214.286	74.8387
PAP	P4	Sun	6	19.326	4.629	0.921	66.344	56.115	159.072	38.375
PAP	P4	Sun	7	8.745	3.023	0.803	72.9967	61.1966	262.87	69.2241
PAP	P4	Sun	8	9.636	2.554	0.893	73.5011	64.1545	234.312	108.902
PAP	P4	Sun	9	13.784	4.071	0.955	80	67.9015	221.25	77.6423
PAP	P4	Sun	10	7.121	3.622	0.898	105.34	84.4721	398.022	118.158
PAP	P4	Sun	11	7.32	3.513	1.102	97.3404	79.6518	369.789	153.056
PAP	P5	Shade	1	19.347	4.243	1.318	66.7829	58.2917	182.103	69.7354
PAP	P5	Shade	2	16.881	3.812	1.141	67.0147	59.4192	197.513	88.4496
PAP	P5	Shade	3	14.534	3.144	0.788	66.335	59.2741	184.941	86.5934
PAP	P5	Shade	4	16.352	3.51	1.444	61.0377	52.8678	161.751	73.2995
PAP	P5	Shade	5	22.491	5.465	1.143	69.7612	60.7865	171.317	72.8025
PAP	P5	Shade	6	21.817	3.789	1.484	61.9801	54.056	141.91	59.5984
PAP	P5	Shade	7	13.874	3.496	0.737	65.9724	58.7384	213.171	77.5789
PAP	P5	Shade	8	21.913	4.969	1.359	65.3924	57.0354	167.306	70.0515
PAP	P5	Shade	9	13.07	2.925	0.715	70.2688	62.6258	210.432	81.25
PAP	P5	Shade	10	16.403	3.8	1.126	67.6412	57.1732	158.996	54.9268
PAP	P5	Shade	11	13.924	3.237	0.996	70.3232	62.0776	217.248	87.3684
PAP	P5	Sun	1	21.057	5.213	1.091	64.8107	55.3694	162.399	46.824
PAP	P5	Sun	2	21.057	5.093	1.379	52.6952	45.6768	138.774	55.83
PAP	P5	Sun	3	30.93	5.664	1.195	73.3112	63.6551	151.04	45.0943
PAP	P5	Sun	4	19.36	4.709	1.112	77.9074	67.906	222.123	72.2078
PAP	P5	Sun	5	20.928	5.073	0.876	78.914	69.4129	218.664	66.8702
PAP	P5	Sun	6	32.823	5.739	0.807	105	84.4213	165.867	19.399
PAP	P5	Sun	7	18.288	3.773	0.898	65.8315	59.6477	214.375	80.1786
PAP	P5	Sun	8	21.622	3.498	1.544	75.9733	66.3048	175.779	71.4815
PAP	P5	Sun	9	22.233	4.083	1.163	78.8404	69.8931	196.298	76.0131
PAP	P5	Sun	10	28.352	5.663	1.433	72.6044	61.7691	156.87	44.2284
PAP	P5	Sun	11	18.113	3.99	1.2	84.2465	72.2785	213.369	71.0059
PAP	P6	Shade	1	18.241	3.964	0.756	78.0197	67.4593	171.602	56
PAP	P6	Shade	2	18.641	3.39	1.963	77.833	66.6941	184.239	90.8796
PAP	P6	Shade	3	22.921	5.31	1.107	78.3356	67.2367	177.592	60.163
PAP	P6	Shade	4	16.724	2.761	0.688	78.924	69.2505	150.874	60.885
PAP	P6	Shade	5	13.325	4.111	1.036	87.8958	73.4564	215.236	96.8224
PAP	P6	Shade	6	16.707	4.519	1.092	94.8722	80.9056	241.658	93.3333
PAP	P6	Shade	7	16.405	4.188	0.716	91.0377	78.9461	240.69	70.1961
PAP	P6	Shade	8	19.891	5.023	0.796	88.4831	75.6599	203.36	59.403
PAP	P6	Shade	9	18.863	4.008	0.75	86.1324	76.6789	215.484	89.2857
PAP	P6	Shade	10	18.603	4.443	0.643	92.5062	80.3933	204.747	74.7674
PAP	P6	Shade	11	12.897	3.929	0.67	90.0628	78.4489	291.037	87.013
PAP	P6	Sun	1	12.446	4.317	1.007	58.8185	50.2463	175.488	87.5652
PAP	P6	Sun	2	14.008	5.224	0.889	63.4708	53.5269	197.879	60.8904
PAP	P6	Sun	3	15.2	4.652	0.999	73.3945	63.4656	241.036	76.2595
PAP	P6	Sun	4	15.436	4.73	1.342	61.992	52.7907	190.726	72.1505
PAP	P6	Sun	5	10.779	3.346	0.649	72.537	59.8501	209.125	41.871
PAP	P6	Sun	6	11.434	4.085	0.947	64.1279	55.5858	260.191	80.9402
PAP	P6	Sun	7	24.167	6.327	0.929	65.2281	55.8387	163.912	39.1983
PAP	P6	Sun	8	16.176	4.148	0.988	66.6227	55.2648	179.567	36.8657
PAP	P6	Sun	9	10.989	3.392	1.699	66.6404	54.945	192.727	97.0857
PAP	P6	Sun	10	14	3.909	1.306	67.8952	56.9801	197.424	66.2944
PAP	P6	Sun	11	17.406	3.908	0.919	70.7273	62.5216	205.684	69.0977
PAP	P7	Shade	1	38.578	5.481	1.108	63.1701	55.628	94.6632	44.498
PAP	P7	Shade	2	19.756	3.324	1.208	64.0597	56.0772	123.111	71.4793
PAP	P7	Shade	3	39.255	6.763	1.572	62.1418	53.8551	106.003	47.0659
PAP	P7	Shade	4	27.754	5.527	1.101	64.1859	55.8655	119.892	60.1639
PAP	P7	Shade	5	22.699	5.743	1.034	68.3088	58.3972	144.296	62.2892
PAP	P7	Shade	6	33.617	4.943	1.789	61.6939	53.5303	104.725	49.8329
PAP	P7	Shade	7	21.364	3.73	1.303	66.9089	58.7407	149.799	66.8205
PAP	P7	Shade	8	20.712	3.942	1.141	67.0074	58.1634	130.099	68.3234
PAP	P7	Shade	9	15.934	3.08	1.848	65.952	55.1159	154	67.2
PAP	P7	Shade	10	22.094	3.823	1.701	64.7159	55.6664	151.107	56.3245
PAP	P7	Shade	11	17.016	3.802	0.745	78.8508	70.227	216.023	83.7079
PAP	P7	Sun	1	23.697	3.847	0.795	61.5187	54.7401	123.698	47.8916
PAP	P7	Sun	2	17.872	3.534	0.829	62.6868	55.7281	152.987	66.32
PAP	P7	Sun	3	25.907	4.462	0.877	68.8833	60.8288	121.913	66.4394
PAP	P7	Sun	4	21.79	4.187	1.062	62.3998	54.5978	136.384	55.3125
PAP	P7	Sun	5	21.492	3.794	1.068	70.7206	62.2235	137.464	76.8345
PAP	P7	Sun	6	19.614	3.692	1.513	73.9593	64.14	157.106	88.4795
PAP	P7	Sun	7	14.249	4.049	1.748	63.1605	51.7769	165.265	69.6414
PAP	P7	Sun	8	31.667	4.758	1.557	59.8281	52.603	115.206	49.586
PAP	P7	Sun	9	24.757	5.333	1.714	56.4584	47.9694	120.93	51.1642
PAP	P7	Sun	10	24.503	4.742	1.232	63.5451	55.676	142.831	57.8404
PAP	P7	Sun	11	23.319	3.066	2.84	64.222	51.6135	110.288	46.6338
PAP	P8	Shade	1	24.158	4.726	0.824	67.8214	60.5615	172.482	53.8562
PAP	P8	Shade	2	25.452	5.437	1.185	63.0781	55.2704	142.33	63.0319
PAP	P8	Shade	3	27.109	6.236	1.029	60.1487	52.4352	137.965	48.7678
PAP	P8	Shade	4	24.715	4.338	0.972	59.8861	53.2995	147.051	45.2093
PAP	P8	Shade	5	30.87	5.388	0.896	66.8037	60.2106	142.54	70
PAP	P8	Shade	6	28.545	4.531	0.743	71.6311	64.5085	150.532	53.4532
PAP	P8	Shade	7	16.58	4.317	0.631	62.8506	55.9757	189.342	65.7292
PAP	P8	Shade	8	29.042	5.003	0.565	65.2923	59.209	140.14	56.5
PAP	P8	Shade	9	26.161	5.569	1.158	61.1953	53.785	147.719	54.6226
PAP	P8	Shade	10	26.873	4.314	0.594	68.4314	62.3214	146.237	66
PAP	P8	Shade	11	27.57	5.243	1.836	60.9416	53.1521	139.813	63.75
PAP	P8	Sun	1	22.023	3.997	0.595	63.1756	56.0382	124.13	48.7705
PAP	P8	Sun	2	16.179	3.772	0.548	64.5096	57.4131	161.888	71.1688
PAP	P8	Sun	3	22.926	5.221	0.684	65.4654	58.5594	170.065	64.5283
PAP	P8	Sun	4	25.528	4.855	0.563	66.7748	60.3784	157.12	58.6458
PAP	P8	Sun	5	28.224	5.385	1.066	68.1081	59.5317	132.635	55.8115
PAP	P8	Sun	6	30.23	5.213	0.613	64.6908	58.0008	120.951	56.7593
PAP	P8	Sun	7	21.568	4.469	0.781	61.977	54.6302	140.535	52.0667
PAP	P8	Sun	8	25.128	4.428	1.216	72.415	63.4225	144.706	65.3763
PAP	P8	Sun	9	33.091	5.587	1.135	67.1217	60.0345	136.936	65.2299
PAP	P8	Sun	10	28.363	4.376	0.859	74.7969	68.1312	158.551	90.4211
PAP	P8	Sun	11	26.627	5.112	0.657	78.2917	70.4418	181.922	67.0408
PAP	P9	Shade	1	24.841	6.512	0.782	66.5622	55.923	127.436	39.2965
PAP	P9	Shade	2	24.841	4.962	2.186	45.4298	37.1816	91.0459	32.7246
PAP	P9	Shade	3	16.37	4.389	1.585	59.5273	48.6045	131.407	55.8099
PAP	P9	Shade	4	26.046	5.479	1.64	62.103	52.3222	114.864	53.4202
PAP	P9	Shade	5	26.046	4.141	1.17	75.9802	65.4258	121.082	55.4502
PAP	P9	Shade	6	23.692	5.675	1.713	63.5515	53.7843	152.554	56.1639
PAP	P9	Shade	7	17.056	5.967	1.156	66.2884	53.551	163.033	46.9919
PAP	P9	Shade	8	17.439	5.362	1.335	65.6589	52.4639	153.2	41.9811
PAP	P9	Shade	9	21.089	5.445	0.848	71.2948	62.7649	192.403	71.2605
PAP	P9	Shade	10	22.171	5.077	1.096	65.6335	54.6622	120.881	42.4806
PAP	P9	Shade	11	19.492	4.564	1.627	70.3936	57.5835	137.885	57.0877
PAP	P9	Sun	1	20.818	4.164	2.509	67.4158	52.7974	136.974	45.5354
PAP	P9	Sun	2	14.433	3.918	0.917	78.5683	65.0135	154.862	70.5385
PAP	P9	Sun	3	10.887	3.694	0.434	87.5161	74.5685	222.53	86.8
PAP	P9	Sun	4	14.078	4.117	0.95	97.696	82.0396	231.292	97.9381
PAP	P9	Sun	5	20.924	4.777	0.914	75.158	64.3815	155.097	57.8481
PAP	P9	Sun	6	17.831	5.14	0.738	79.4962	65.5793	146.439	59.04
PAP	P9	Sun	7	25.419	4.401	1.039	78.9655	66.6815	121.24	45.1739
PAP	P9	Sun	8	25.62	5.899	0.634	81.0503	67.2264	122.896	37.2941
PAP	P9	Sun	9	18.596	4.543	1.354	85.6564	67.7203	132.836	58.1116
PAP	P9	Sun	10	23.988	5.535	0.812	87.3244	72.9119	138.03	57.1831
PAP	P9	Sun	11	17.839	4.39	1.009	81.9807	69.0899	155.674	81.371
PAP	P10	Shade	1	15.284	4.897	1.057	85.1002	70.4332	197.46	83.8889
PAP	P10	Shade	2	28.036	5.496	0.878	76.2884	66.5306	143.125	56.6452
PAP	P10	Shade	3	14.604	4.906	1.389	66.4725	54.8198	180.368	71.2308
PAP	P10	Shade	4	24.499	4.556	0.971	76.9925	66.3031	139.755	51.9251
PAP	P10	Shade	5	30.213	5.622	1.292	76.3726	66.7396	139.158	77.3653
PAP	P10	Shade	6	22.094	5.535	1.113	75.9505	65.5219	169.785	81.2409
PAP	P10	Shade	7	22.98	4.804	0.685	89.486	79.4057	185.483	102.239
PAP	P10	Shade	8	17.938	5.086	0.87	75.3381	64.8283	191.925	71.9008
PAP	P10	Shade	9	21.517	5.229	0.564	78.9615	68.8544	176.061	54.7573
PAP	P10	Shade	10	10.301	3.113	0.887	74.2147	64.1407	232.313	105.595
PAP	P10	Shade	11	12.531	4.317	0.849	81.3701	68.9653	241.173	86.6327
PAP	P10	Sun	1	13.896	4.745	1.595	63.2211	51.6196	186.811	66.4583
PAP	P10	Sun	2	14.416	4.537	0.485	68.8772	59.4965	181.48	60.625
PAP	P10	Sun	3	15.769	4.642	0.758	70.0844	60.0495	161.181	86.1364
PAP	P10	Sun	4	11.196	3.543	0.543	84.3708	71.4943	207.193	79.8529
PAP	P10	Sun	5	13.05	4.345	0.719	66.6837	57.7434	204.953	79.011
PAP	P10	Sun	6	13.754	4.667	0.869	73.748	61.8992	191.27	76.9027
PAP	P10	Sun	7	14.838	4.946	0.841	67.2925	57.8029	187.348	85.8163
PAP	P10	Sun	8	13.719	4.528	0.61	70.1739	55.0522	188.667	20.5387
PAP	P10	Sun	9	13.504	4.451	0.544	68.898	59.4366	200.495	60.4444
PAP	P10	Sun	10	14.378	5.151	0.536	79.6124	68.5973	222.026	92.4138
PAP	P10	Sun	11	13.641	4.351	0.609	74.9505	64.8029	214.335	74.2683
PAP	P11	Shade	1	33.678	6.785	3.799	59.0531	45.6465	122.032	33.95
PAP	P11	Shade	2	19.089	5.319	3.11	63.9283	52.27	205.367	76.4128
PAP	P11	Shade	3	22.058	5.962	2.523	62.258	51.3335	177.44	60.3589
PAP	P11	Shade	4	18.907	5.251	3.022	65.219	49.6377	177.399	49.2182
PAP	P11	Shade	5	24.336	6.12	2.583	69.1167	57.6273	187.73	68.6968
PAP	P11	Shade	6	19.435	4.29	3.69	65.9261	52.4561	196.789	68.4601
PAP	P11	Shade	7	32.095	6.777	2.376	71.5129	60.2949	172.443	53.7557
PAP	P11	Shade	8	20.631	5.712	2.255	62.4047	52.4295	187.279	69.5988
PAP	P11	Shade	9	18.539	5.062	2.48	65.7178	53.0443	203.293	58.3529
PAP	P11	Shade	10	20.115	4.414	3.248	78.238	64.4092	205.302	96.3798
PAP	P11	Shade	11	16.679	4.45	1.747	73.4111	62.8211	268.072	80.5069
PAP	P11	Sun	1	33.643	5.809	4.596	75.4835	54.9632	127.39	38.0464
PAP	P11	Sun	2	31.134	5.539	2.285	71.3592	52.0897	144.245	18.5772
PAP	P11	Sun	3	29.471	6.325	2.338	74.6101	62.005	151.316	60.7273
PAP	P11	Sun	4	26.971	5.409	2.262	74.2185	52.0174	130.969	19.877
PAP	P11	Sun	5	19.366	3.611	2.312	84.5677	68.0225	172.775	66.4368
PAP	P11	Sun	6	24.117	5.455	4.145	86.5029	63.903	189.41	59.384
PAP	P11	Sun	7	36.355	7.023	4.25	84.2136	61.7862	142.744	39.5349
PAP	P11	Sun	8	27.86	6.548	3.157	79.3958	62.9178	160.098	61.902
PAP	P11	Sun	9	35.625	6.867	3.363	80.1102	62.9639	146.106	45.3846
PAP	P11	Sun	10	45.218	8.607	3.806	82.4695	61.3209	134.484	30.4237
PAP	P11	Sun	11	54.229	8.913	2.192	84.1543	62.0682	122.6	13.9974
PAP	P12	Shade	1	15.709	3.479	1.64	70.5388	59.1899	180.259	70.0855
PAP	P12	Shade	2	10.352	3.207	0.947	73.9957	60.4673	192.036	64.863
PAP	P12	Shade	3	15.789	2.928	2.502	67.5321	53.5039	142.136	61.4742
PAP	P12	Shade	4	15.127	2.783	1.78	74.2612	61.6422	165.655	71.4859
PAP	P12	Shade	5	16.511	3.32	1.254	76.9744	66.3892	194.152	73.3333
PAP	P12	Shade	6	26.774	3.832	2.051	80.0179	68.5283	140.882	70.9689
PAP	P12	Shade	7	15.094	3.394	0.948	78.2478	67.2339	198.48	65.3793
PAP	P12	Shade	8	12.949	2.813	1.319	75.1538	61.2411	179.172	56.2645
PAP	P12	Shade	9	15.035	3.019	1.011	75.6668	66.1752	182.97	84.25
PAP	P12	Shade	10	15.094	3.274	0.922	80.9764	70.0743	187.086	80.1739
PAP	P12	Shade	11	14.854	3.549	0.867	75.5929	65.5227	201.648	68.8095
PAP	P12	Sun	1	15.305	3.024	1.425	61.269	51.4973	149.703	52.3897
PAP	P12	Sun	2	12.511	3.377	0.811	61.3284	53.5574	201.012	63.3594
PAP	P12	Sun	3	15.907	3.948	0.987	71.236	61.2987	177.04	71.0072
PAP	P12	Sun	4	14.028	3.321	0.684	70.4571	61.4724	185.531	61.0714
PAP	P12	Sun	5	17.66	3.914	0.95	66.818	57.6936	153.49	58.2822
PAP	P12	Sun	6	17.418	3.782	1.09	74.1507	64.5829	191.01	72.6667
PAP	P12	Sun	7	14.338	2.587	1.112	66.1958	57.4439	160.683	65.7988
PAP	P12	Sun	8	13.707	3.722	1.222	67.5222	55.5839	163.246	58.75
PAP	P12	Sun	9	17.089	2.993	1.462	68.493	58.1852	153.487	59.1903
PAP	P12	Sun	10	15.914	3.013	1.379	68.7727	57.9956	149.9	60.2183
PAP	P12	Sun	11	15.05	2.857	1.073	70.591	61.7816	177.453	75.035
PAP	P13	Shade	1	11.609	3.581	0.695	68.7737	60.5266	269.248	71.6495
PAP	P13	Shade	2	12.832	3.378	0.941	64.2242	55.0257	158.592	77.7686
PAP	P13	Shade	3	17.562	3.619	0.713	71.9459	62.4538	142.48	60.9402
PAP	P13	Shade	4	20.436	4.394	1.065	59.5628	50.5842	121.047	43.2927
PAP	P13	Shade	5	19.238	3.961	0.564	69.0524	61.7989	165.732	64.0909
PAP	P13	Shade	6	13.629	3.524	0.558	80.4545	69.6067	217.531	54.7059
PAP	P13	Shade	7	18.94	4.255	1.208	73.6392	63.7925	191.667	69.0286
PAP	P13	Shade	8	15.865	4.49	1.304	74.9764	63.6127	208.837	80
PAP	P13	Shade	9	20.497	4.86	1.073	66.8962	57.9666	150.464	72.0134
PAP	P13	Shade	10	21.739	4.441	1.005	65.3608	57.7397	162.08	60.9091
PAP	P13	Shade	11	11.963	3.685	1.123	80.1273	68.951	307.083	92.0492
PAP	P13	Sun	1	13.489	3.809	0.955	69.9274	60.2995	210.442	75.1969
PAP	P13	Sun	2	16.425	3.934	1.08	62.0983	53.9763	164.603	67.9245
PAP	P13	Sun	3	16.9	4.504	0.875	71.3682	62.1781	214.476	62.5
PAP	P13	Sun	4	16.209	3.755	1.112	67.2573	58.3687	197.632	62.8249
PAP	P13	Sun	5	15.671	3.968	0.633	75.1246	65.9554	193.561	74.4706
PAP	P13	Sun	6	16.981	4.263	0.831	73.8947	64.1034	181.404	71.6379
PAP	P13	Sun	7	17.787	4.304	1.368	76.3391	64.469	192.143	66.7317
PAP	P13	Sun	8	21.483	4.454	1.489	64.8837	53.0969	207.163	28.6346
PAP	P13	Sun	9	16.961	4.396	1.372	60.2308	49.7974	203.519	36.6845
PAP	P13	Sun	10	17.973	3.095	1.255	66.3455	55.2845	170.055	34.8611
PAP	P13	Sun	11	16.649	4.208	0.966	91.73	79.7748	236.404	102.766
PAP	P14	Shade	1	13.19	3.798	1.591	78.2325	65.95	230.182	106.779
PAP	P14	Shade	2	16.573	4.098	1.542	83.999	70.5534	190.605	95.7764
PAP	P14	Shade	3	13.49	4.176	0.999	77.5287	64.887	183.158	90
PAP	P14	Shade	4	15.653	3.89	1.257	90.3231	76.9946	227.485	97.4419
PAP	P14	Shade	5	16.899	4.664	0.781	86.2194	73.9886	195.966	90.814
PAP	P14	Shade	6	14.838	3.586	1.815	70.289	58.1199	180.201	74.6914
PAP	P14	Shade	7	15.315	3.824	1.327	91.3783	78.0979	246.71	102.077
PAP	P14	Shade	8	12.529	3.566	1.731	70.0727	56.1839	178.3	71.5289
PAP	P14	Shade	9	16.097	4.431	1.532	72.8371	60.2658	178.669	71.9249
PAP	P14	Shade	10	18.563	4.089	2.293	79.944	65.0877	173.263	77.9932
PAP	P14	Shade	11	17.336	4.014	1.263	107.811	93.0043	247.778	134.362
PAP	P14	Sun	1	23.017	3.178	1.552	80.9033	69.5798	138.174	66.6094
PAP	P14	Sun	2	19.93	3.615	1.018	92.784	80.7864	184.439	82.7642
PAP	P14	Sun	3	18.189	3.468	1.559	81.4554	68.1491	165.143	68.9823
PAP	P14	Sun	4	11.167	3.385	0.837	98.823	82.9643	228.716	123.088
PAP	P14	Sun	5	15.391	3.251	1.166	95.9539	82.5697	230.567	97.9832
PAP	P14	Sun	6	18.241	3.918	1.615	91.3878	74.5443	153.647	82.398
PAP	P14	Sun	7	13.272	3.426	1.327	92.9412	78.0706	244.714	100.53
PAP	P14	Sun	8	12.994	3.137	1.005	99.0396	84.8172	241.308	111.667
PAP	P14	Sun	9	18.024	3.342	1.561	89.9401	73.4474	170.51	61.4567
PAP	P14	Sun	10	15.834	3.098	0.874	91.3676	78.6587	193.625	72.8333
PAP	P14	Sun	11	15.169	3.449	1.4	94.5698	78.8	207.771	90.3226
PAP	P15	Shade	1	14.794	3.498	0.787	113.975	98.2337	239.589	126.935
PAP	P15	Shade	2	22.424	4.148	0.954	107.189	94.656	223.011	104.835
PAP	P15	Shade	3	16.087	3.959	0.634	111.483	97.7339	258.758	126.8
PAP	P15	Shade	4	30.038	4.146	1.286	103.011	91.1071	178.707	86.3087
PAP	P15	Shade	5	23.624	4.665	0.811	110.911	96.8197	204.605	98.9024
PAP	P15	Shade	6	18.732	4.543	1.668	129.544	109.93	293.097	161.942
PAP	P15	Shade	7	16.479	4.248	0.841	126.276	109.422	310.073	131.406
PAP	P15	Shade	8	17.526	4.773	0.643	118.579	97.2586	300.189	38.9697
PAP	P15	Shade	9	11.508	3.211	0.97	134.282	115.891	373.372	194
PAP	P15	Shade	10	12.358	2.58	1.334	123.704	107.368	307.143	196.176
PAP	P15	Shade	11	32.922	5.388	1.35	113.642	97.6914	165.276	91.8367
PAP	P15	Sun	1	10.291	3.001	1.36	75.062	61.8821	194.87	98.5507
PAP	P15	Sun	2	15.246	2.691	1.775	67.3113	55.9486	143.904	65.0183
PAP	P15	Sun	3	21.975	4.686	2.224	67.4701	53.8471	133.504	47.019
PAP	P15	Sun	4	15.419	2.955	1.8	72.0514	59.8796	172.807	68.1818
PAP	P15	Sun	5	15.419	4.451	1.907	52.3921	43.9914	154.549	69.5985
PAP	P15	Sun	6	18.982	3.125	1.569	66.4636	55.2927	128.601	46.976
PAP	P15	Sun	7	25.265	4.052	1.752	75.8253	61.7575	136.892	37.8402
PAP	P15	Sun	8	13.788	3.196	1.532	92.1658	79.0596	243.969	130.94
PAP	P15	Sun	9	18.089	4.308	1.964	75.2454	61.9486	188.947	68.1944
PAP	P15	Sun	10	13.171	2.845	1.553	72.7278	60.3068	196.207	68.114
PAP	P15	Sun	11	16.305	2.426	1.426	78.3894	61.9256	133.297	38.4367
PAP	P16	Shade	1	14.842	3.963	1.007	69.3227	58.7569	204.278	52.7225
PAP	P16	Shade	2	15.589	3.88	1.296	76.6798	64.7653	216.76	66.4615
PAP	P16	Shade	3	16.865	4.018	1.429	68.0589	58.2757	185.161	71.809
PAP	P16	Shade	4	15.005	4.296	1.528	75.2508	63.5805	201.69	99.8693
PAP	P16	Shade	5	17.845	4.305	0.869	74.7904	65.6066	185.56	85.1961
PAP	P16	Shade	6	18.575	5.026	0.517	82.0813	72.0799	216.638	63.0488
PAP	P16	Shade	7	26.109	4.957	2.671	71.886	59.1103	154.906	57.4409
PAP	P16	Shade	8	24.966	5.66	2.341	72.4492	60.4943	163.112	70.0898
PAP	P16	Shade	9	20.834	5.605	0.893	77.0488	66.6475	209.142	57.987
PAP	P16	Shade	10	19.874	4.157	1.514	68.4131	58.6081	168.3	63.3473
PAP	P16	Shade	11	19.161	5.099	1.404	126.392	106.925	386.288	97.5
PAP	P16	Sun	1	12.582	3.545	1.533	53.7692	44.5538	175.495	54.3617
PAP	P16	Sun	2	12.61	3.856	1.455	52.129	42.1176	160	43.5629
PAP	P16	Sun	3	10.321	3.851	1.066	62.8563	52.7658	211.593	80.7576
PAP	P16	Sun	4	13.044	4.133	1.509	55.131	44.5949	165.984	48.6774
PAP	P16	Sun	5	17.367	4.231	1.924	58.0448	46.6855	152.194	42.7556
PAP	P16	Sun	6	11.302	3.742	1.199	59.8623	50.8412	225.422	70.9467
PAP	P16	Sun	7	8.765	3.285	1.303	62.4288	50.258	221.959	67.8646
PAP	P16	Sun	8	9.341	3.245	1.126	58.8595	47.0342	208.013	46.3374
PAP	P16	Sun	9	12.882	3.634	1.5	56.2533	44.5128	174.712	37.8788
PAP	P16	Sun	10	15.997	4.195	1.67	58.8774	49.1007	155.948	61.3971
PAP	P16	Sun	11	9.845	3.461	0.938	39.1296	33.4069	136.26	52.9944
PAP	P17	Shade	1	22.899	6.638	1.248	60.9178	50.8867	163.498	37.2537
PAP	P17	Shade	2	18.454	5.732	0.8	60.6043	52.3369	174.225	52.6316
PAP	P17	Shade	3	13.681	3.604	0.956	73.0432	64.7468	234.026	111.163
PAP	P17	Shade	4	34.231	5.813	1.548	58.9478	51.1368	107.648	44.611
PAP	P17	Shade	5	13.892	4.314	0.826	65.4974	56.6327	202.535	69.4118
PAP	P17	Shade	6	21.887	5.227	1.602	59.8169	50.6409	151.507	50.3774
PAP	P17	Shade	7	18.191	4.593	2.003	60.4352	49.365	159.479	51.7571
PAP	P17	Shade	8	17.017	3.262	1.135	71.9231	63.4489	175.376	87.3077
PAP	P17	Shade	9	23.92	4.205	2.665	64.4744	54.6993	161.111	66.2935
PAP	P17	Shade	10	23.132	5.139	0.852	71.7716	63.254	188.934	52.5926
PAP	P17	Shade	11	10.979	2.849	1.251	66.8229	56.7977	261.376	69.116
PAP	P17	Sun	1	17.711	4.332	1.24	44.7135	38.7549	130.09	44.9275
PAP	P17	Sun	2	10.914	4.485	0.997	43.4129	37.3895	185.331	61.1656
PAP	P17	Sun	3	13.543	4.856	1.037	42.0199	36.2597	161.867	48.9151
PAP	P17	Sun	4	12.033	4.319	0.996	43.0981	36.911	169.373	46.7606
PAP	P17	Sun	5	11.92	5.589	1.628	41.2314	34.3615	157.437	73.0045
PAP	P17	Sun	6	10.788	4.891	1.131	49.5317	42.4892	218.348	82.5547
PAP	P17	Sun	7	7.048	3.07	0.567	53.2326	46.7374	239.844	101.25
PAP	P17	Sun	8	7.446	3.337	0.969	44.2162	38.0092	222.467	77.52
PAP	P17	Sun	9	10.101	4.026	1.267	42.7646	36.4921	207.526	59.7642
PAP	P17	Sun	10	15.099	5.271	2.217	39.6299	31.1255	141.314	33.1886
PAP	P17	Sun	11	11.6603	4.001	0.484	84.8022	73.7527	274.041	80.6667
PAP	P18	Shade	1	22.605	4.728	0.634	62.3414	55.7735	142.41	66.7368
PAP	P18	Shade	2	20.73	3.167	1.433	60.0695	49.5459	116.007	31.1522
PAP	P18	Shade	3	17.109	2.939	1.483	56.4467	49.1638	124.534	69.6244
PAP	P18	Shade	4	28.556	4.615	0.67	70.8937	63.6558	131.481	62.6168
PAP	P18	Shade	5	34.413	3.474	0.467	68.9363	62.7974	94.4022	38.9167
PAP	P18	Shade	6	27.51	4.003	0.939	68.2292	61.0384	123.169	62.6
PAP	P18	Shade	7	21.837	3.474	1.242	65.224	57.5415	129.627	69.3855
PAP	P18	Shade	8	23.876	3.216	0.698	69.9766	63.7373	136.271	71.2245
PAP	P18	Shade	9	32.249	4.485	1.006	72.3721	61.3916	127.778	22.5561
PAP	P18	Shade	10	22.081	3.412	0.867	68.874	61.8515	135.936	76.7257
PAP	P18	Shade	11	21.469	3.511	1.488	71.2309	62.3374	150.687	75.533
PAP	P18	Sun	1	27.758	3.829	1.501	50.4783	44.9595	114.985	43.8889
PAP	P18	Sun	2	18.007	4.209	0.634	55.7838	49.8119	145.138	65.3608
PAP	P18	Sun	3	25.465	2.957	1.191	49.9804	45.7674	99.8986	68.8439
PAP	P18	Sun	4	26.179	3.559	1.817	47.6328	42.4501	104.064	55.228
PAP	P18	Sun	5	22.069	3.266	1.374	57.2329	51.6234	132.764	79.422
PAP	P18	Sun	6	18.178	2.97	0.99	59.6391	54.0048	154.688	78.5714
PAP	P18	Sun	7	40.311	4.164	0.96	57.8848	52.7079	90.917	42.4779
PAP	P18	Sun	8	16.837	3.286	1.263	55.131	48.7746	145.398	73.4302
PAP	P18	Sun	9	36.901	4.362	0.63	63.9643	58.4895	100.972	58.3333
PAP	P18	Sun	10	27.463	4.162	0.659	57.659	52.211	116.257	47.4101
PAP	P18	Sun	11	25.348	4.05	1.376	67.5586	60.4243	133.663	98.2857
PAP	P19	Shade	1	22.911	5.649	2.308	74.1456	61.1123	160.483	75.1792
PAP	P19	Shade	2	21.712	6.212	1.434	76.6667	62.6428	156.869	60.2521
PAP	P19	Shade	3	22.691	6.098	1.653	83.6997	69.1588	169.389	78.7143
PAP	P19	Shade	4	12.651	4.445	1.073	92.8855	74.3302	214.734	80.6767
PAP	P19	Shade	5	18.625	5.118	1.621	88.1031	72.302	185.435	87.1505
PAP	P19	Shade	6	34.059	6.595	1.367	93.5173	80.3089	166.121	67.6733
PAP	P19	Shade	7	15.786	5.887	1.638	83.9234	68.0138	224.695	92.0225
PAP	P19	Shade	8	32.748	7.489	1.527	81.2202	68.2291	133.732	73.5144
PAP	P19	Shade	9	35.366	7.1	1.933	87.2804	71.1303	132.959	50.0777
PAP	P19	Shade	10	16.176	5.481	1.867	82.1117	63.3856	171.818	70.9886
PAP	P19	Shade	11	13.151	5.125	0.922	100.16	81.6325	238.372	111.084
PAP	P19	Sun	1	21.492	5.752	1.721	60.3538	50.5575	136.952	63.7407
PAP	P19	Sun	2	30.393	5.096	0.648	60.0533	53.4429	107.284	42.9139
PAP	P19	Sun	3	25.511	3.992	1.687	59.5912	50.8289	113.088	43.8182
PAP	P19	Sun	4	21.407	4.878	1.609	50.6795	43.4836	123.807	52.7541
PAP	P19	Sun	5	20.814	5.694	0.838	64.8411	55.0053	135.571	54.4156
PAP	P19	Sun	6	27.488	6.313	2.316	57.6631	27.6623	112.732	5.02386
PAP	P19	Sun	7	22.33	4.35	1.53	62.4266	53.8981	134.675	62.963
PAP	P19	Sun	8	13.526	3.355	1.637	59.0655	49.9114	160.526	77.5829
PAP	P19	Sun	9	22.977	5.928	1.595	60.8501	51.4257	133.514	64.3145
PAP	P19	Sun	10	17.123	5.682	1.086	71.2568	59.4549	177.562	69.172
PAP	P19	Sun	11	23.665	6.572	1.889	62.8552	51.614	131.44	59.0312
PAP	P20	Shade	1	24.041	5.68	2.299	52.1723	42.7016	113.828	43.9579
PAP	P20	Shade	2	18.445	4.903	0.76	59.4233	51.8993	159.707	53.1469
PAP	P20	Shade	3	28.757	6.416	2.637	56.586	47.4225	121.977	57.8289
PAP	P20	Shade	4	15.975	4.379	0.959	60.95	52.8623	168.423	68.0142
PAP	P20	Shade	5	29.325	5.835	1.413	70.3575	61.854	157.703	69.6059
PAP	P20	Shade	6	28.529	6.043	2.111	57.414	41.4064	148.113	13.9524
PAP	P20	Shade	7	20.199	5.675	1.108	78.0185	67.8274	204.137	99.8198
PAP	P20	Shade	8	13.326	3.298	1.165	71.4914	61.6374	192.865	91.7323
PAP	P20	Shade	9	10.935	2.869	1.298	61.2262	51.0743	195.17	62.4038
PAP	P20	Shade	10	14.726	4.217	1.571	66.7846	56.4864	210.85	77.7723
PAP	P20	Shade	11	21.474	5.5	2.139	63.6078	52.5551	175.159	54.0152
PAP	P20	Sun	1	18.223	4.778	1.278	54.3159	46.5823	166.481	47.3333
PAP	P20	Sun	2	24.28	4.765	0.994	51.202	43.9139	95.3	34.6341
PAP	P20	Sun	3	22.542	4.753	1.126	56.4679	48.6448	142.305	36.5584
PAP	P20	Sun	4	15.482	3.797	1.626	51.1463	44.0455	213.315	52.4516
PAP	P20	Sun	5	10.191	3.679	1.081	53.356	45.3135	251.986	56.0104
PAP	P20	Sun	6	20.032	3.643	1.931	52.6604	43.7189	144.563	36.711
PAP	P20	Sun	7	21.105	4.752	1.737	53.471	45.593	153.786	46.5684
PAP	P20	Sun	8	19.35	4.709	1.298	56.25	49.2241	175.709	58.2063
PAP	P20	Sun	9	20.447	4.649	1.028	53.893	46.8538	149.968	39.5385
PAP	P20	Sun	10	11.788	3.727	1.677	54.448	45.5663	225.879	65.2529
PAP	P20	Sun	11	6.774	3.059	1.245	70.8577	57.5042	343.708	93.609
MOC	M1	Shade	1	17.751	3.772	1	55.7506	46.2748	134.714	26.8817
MOC	M1	Shade	2	17.974	4.442	0.527	62.1938	56.1863	188.22	72.1918
MOC	M1	Shade	3	14.571	2.801	0.84	57.8674	51.6702	152.228	71.1864
MOC	M1	Shade	4	13.717	3.459	0.707	54.6712	48.47	155.811	71.4141
MOC	M1	Shade	5	11.669	3.802	0.707	41.9597	37.5813	169.732	70.7
MOC	M1	Shade	6	15.319	2.802	0.544	95.5646	84.9639	197.324	93.7931
MOC	M1	Shade	7	16.069	3.642	0.89	82.2364	72.4155	204.607	102.299
MOC	M1	Shade	8	12.432	3.949	1.114	52.4778	45.1908	149.583	94.4068
MOC	M1	Shade	9	13.147	3.975	0.718	70.9881	62.5155	218.407	104.058
MOC	M1	Shade	10	23.912	5.461	1.102	63.4102	56.171	183.872	58.3069
MOC	M1	Shade	11	22.315	4.97	1.198	73.9887	65.4591	206.224	78.8158
MOC	M1	Sun	1	13.641	2.676	0.541	53.4731	47.381	121.086	50.5607
MOC	M1	Sun	2	13.51	2.578	0.547	53.8033	48.4229	136.402	60.7778
MOC	M1	Sun	3	22.339	3.766	1.006	48.5947	42.591	99.1053	37.5373
MOC	M1	Sun	4	16.343	3.263	0.44	49.1371	43.6395	132.642	25.4335
MOC	M1	Sun	5	13.412	2.519	0.802	47.2254	41.9256	130.518	48.3133
MOC	M1	Sun	6	20.219	2.321	0.886	48.5917	43.5285	89.2692	39.5536
MOC	M1	Sun	7	13.325	2.483	1.125	53.6649	47.1014	134.946	69.4444
MOC	M1	Sun	8	23.801	3.82	0.845	52.5292	47.3087	115.758	49.7059
MOC	M1	Sun	9	12.035	3.158	0.713	50.3767	43.4633	131.037	51.295
MOC	M1	Sun	10	16.696	3.401	1.164	49.8835	43.2091	121.032	49.322
MOC	M1	Sun	11	12.861	2.94	0.727	59.7908	39.6211	178.182	7.8172
MOC	M2	Shade	1	15.806	2.519	1.364	56.6117	47.9406	131.885	43.4395
MOC	M2	Shade	2	15.69	3.132	1.679	42.3596	36.5905	146.355	45.3784
MOC	M2	Shade	3	18.114	4.708	0.896	58.1509	50.2608	150.415	50.9091
MOC	M2	Shade	4	27.412	3.664	1.229	66.9075	58.9252	123.367	47.6357
MOC	M2	Shade	5	20.479	4.031	1.326	54.1772	47.0349	132.599	49.1111
MOC	M2	Shade	6	23.878	4.711	0.993	70.044	62.053	155.479	73.0147
MOC	M2	Shade	7	24.451	4.828	1.963	61.8386	51.5735	130.135	47.1875
MOC	M2	Shade	8	26.331	4.989	1.588	68.4633	59.9522	147.168	76.715
MOC	M2	Shade	9	24.526	4.987	1.927	63.0164	53.3638	166.789	47.5802
MOC	M2	Shade	10	20.971	4.482	0.784	71.1847	53.6343	169.132	11.216
MOC	M2	Shade	11	26.018	5.437	1.333	78.4383	68.1635	174.823	70.5291
MOC	M2	Sun	1	14.112	2.666	1.441	47.6596	42.2515	144.108	74.2784
MOC	M2	Sun	2	16.56	2.926	0.854	51.4445	44.7326	106.4	41.0577
MOC	M2	Sun	3	18.761	4.608	0.879	53.5264	47.6409	148.645	71.4634
MOC	M2	Sun	4	20.409	3.465	0.912	52.1836	47.0037	116.275	68.5714
MOC	M2	Sun	5	17.068	3.646	1.228	46.7488	41.7107	142.422	66.3784
MOC	M2	Sun	6	12.011	3.396	1.182	56.8434	49.735	197.442	90.9231
MOC	M2	Sun	7	34.228	5.319	1.776	56.8949	49.8007	116.901	44.1791
MOC	M2	Sun	8	18.041	3.174	1.143	56.2902	50.1	141.696	66.4535
MOC	M2	Sun	9	18.591	3.927	1.267	52.5169	45.9037	144.908	53.0126
MOC	M2	Sun	10	18.32	3.944	1.006	59.5192	51.9716	152.278	53.5106
MOC	M2	Sun	11	26.613	4.246	1.077	69.0529	60.8019	142.963	47.6549
MOC	M3	Shade	1	30.407	5.244	1.338	63.0328	55.6293	124.265	60.8182
MOC	M3	Shade	2	29.868	5.095	1.12	69.059	60.4493	133.727	47.6596
MOC	M3	Shade	3	30.234	4.977	1.197	61.6391	54.2314	116.285	49.4628
MOC	M3	Shade	4	28.475	4.707	1.132	64.0752	55.6587	124.854	38.3729
MOC	M3	Shade	5	21.162	4.622	1.167	62.5539	53.7652	129.106	59.8462
MOC	M3	Shade	6	20.709	4.436	0.73	79.8035	70.9212	199.82	70.8738
MOC	M3	Shade	7	18.464	3.379	1.381	72.0968	39.5883	158.638	7.30688
MOC	M3	Shade	8	23.258	4.298	1.155	75.0742	64.7134	135.584	64.5251
MOC	M3	Shade	9	35.65	5.171	1.051	74.9107	66.5484	121.385	61.1047
MOC	M3	Shade	10	30.406	5.598	1.187	70.1245	61.7255	160.862	49.0496
MOC	M3	Shade	11	24.463	4.493	1.084	72.1835	61.8065	150.772	40
MOC	M3	Sun	1	26.673	5.5	1.611	54.6802	46.2591	127.021	35.4066
MOC	M3	Sun	2	24.454	5.935	1.522	63.3523	53.2071	152.964	43.7356
MOC	M3	Sun	3	19.163	5.251	1.004	66.3539	55.6094	154.441	46.055
MOC	M3	Sun	4	20.862	5.886	1.5	65.6451	53.6436	149.771	47.1698
MOC	M3	Sun	5	14.171	4.735	1.027	62.9822	53.7595	188.645	76.0741
MOC	M3	Sun	6	30.044	5.471	0.612	65.1997	58.806	138.157	58.2857
MOC	M3	Sun	7	31.787	5.765	0.967	71.7054	62.0719	112.16	55.5747
MOC	M3	Sun	8	20.626	4.677	0.699	77.9516	69.3078	194.066	78.5393
MOC	M3	Sun	9	21.133	5.216	1.677	68.8596	56.4299	186.286	42.3485
MOC	M3	Sun	10	27.039	5.65	1.007	82.0856	70.4141	190.878	40.28
MOC	M3	Sun	11	20.006	4.756	1.265	64.1424	55.1433	173.577	53.8298
MOC	M4	Shade	1	27.31	4.163	1.526	68.7563	60.635	140.642	64.661
MOC	M4	Shade	2	26.75	4.335	2.058	66.9252	56.3395	143.069	45.9375
MOC	M4	Shade	3	14.433	1.906	0.908	69.5566	62.9987	157.521	95.5789
MOC	M4	Shade	4	32.138	5.822	1.292	61.8752	53.8686	116.673	47.326
MOC	M4	Shade	5	22.692	4.097	1.156	63.0508	56.4197	172.143	62.4865
MOC	M4	Shade	6	29.993	4.238	1.432	75.4921	68.0731	162.375	83.2558
MOC	M4	Shade	7	16.79	1.942	1.71	72.8416	63.9375	141.752	92.9348
MOC	M4	Shade	8	23.523	2.323	1.393	75.7097	67.8092	129.777	76.1202
MOC	M4	Shade	9	19.495	3.29	1.158	69.4761	62.185	175.936	81.5493
MOC	M4	Shade	10	23.446	4.077	1.949	69.2849	58.9244	161.786	56.8222
MOC	M4	Shade	11	26.046	3.937	1.616	69.9409	61.5308	138.14	72.1429
MOC	M4	Sun	1	24.056	2.816	2.114	52.7313	44.4987	78.6592	43.4979
MOC	M4	Sun	2	33.491	4.775	2.323	53.1772	43.8938	97.8484	27.5237
MOC	M4	Sun	3	25.595	4.84	1.774	59.6342	51.7803	134.072	61.1724
MOC	M4	Sun	4	21.755	4.266	1.258	56.0985	49.4207	132.484	62.2772
MOC	M4	Sun	5	18.326	2.517	1.693	49.921	43.1606	103.156	51.148
MOC	M4	Sun	6	34.172	5.264	2.49	52.2907	43.889	86.5789	38.7247
MOC	M4	Sun	7	29.888	5.107	1.974	56.692	49.6974	127.357	57.8886
MOC	M4	Sun	8	13.258	2.227	1.551	54.5597	48.0536	157.943	82.5
MOC	M4	Sun	9	32.098	5.888	2.28	51.3322	43.2355	100.307	39.0411
MOC	M4	Sun	10	16.168	3.968	1.258	59.6165	51.0032	143.249	69.5028
MOC	M4	Sun	11	24.572	4.606	3.237	62.7157	52.2031	130.852	74.0732
MOC	M5	Shade	1	21.523	3.195	0.725	65.8196	60.221	141.372	92.9487
MOC	M5	Shade	2	10.546	3.423	1.265	65.5846	56.76	210	145.402
MOC	M5	Shade	3	19.467	3.618	1.697	60.0463	52.9858	142.441	95.3371
MOC	M5	Shade	4	16.34	2.942	0.97	65.2556	59.2673	166.215	127.632
MOC	M5	Shade	5	20.661	3.178	1.213	56.933	50.7018	123.178	64.5213
MOC	M5	Shade	6	17.128	3.162	0.806	75.9894	68.1305	172.787	104.675
MOC	M5	Shade	7	19.677	3.455	1.025	66.5438	59.1789	153.556	71.6783
MOC	M5	Shade	8	11.533	1.745	1.408	63.5427	55.2082	146.639	90.8387
MOC	M5	Shade	9	20.935	3.39	1.291	62.0296	54.8467	132.941	69.0374
MOC	M5	Shade	10	25.455	3.581	1.104	69.3786	62.9295	134.12	101.284
MOC	M5	Shade	11	23.201	3.751	1.224	71.0815	63.8618	147.677	106.435
MOC	M5	Sun	1	15.239	2.974	1.385	50.4436	44.1582	126.017	71.3918
MOC	M5	Sun	2	15.909	2.397	0.879	51.3194	46.033	118.663	57.0779
MOC	M5	Sun	3	13.273	2.97	0.872	56.2415	49.9736	160.541	78.5586
MOC	M5	Sun	4	15.423	2.607	1.121	52.7643	46.1076	126.553	51.8981
MOC	M5	Sun	5	14.096	3.012	0.84	54.7417	48.8596	184.785	57.1429
MOC	M5	Sun	6	16.825	2.94	1.266	54.0475	47.9345	140.67	67.3404
MOC	M5	Sun	7	14.357	2.97	1.045	58.4093	52.1504	165.922	90.0862
MOC	M5	Sun	8	15.166	2.461	0.983	60.1825	53.3076	143.918	63.8312
MOC	M5	Sun	9	17.983	3.273	1.212	65.369	58.1974	152.233	97.7419
MOC	M5	Sun	10	14.367	2.91	0.883	59.4907	52.4726	149.231	68.9844
MOC	M5	Sun	11	12.309	1.928	0.949	56.9071	50.5919	132.055	76.5323
MOC	M6	Shade	1	23.571	3.344	1.346	68.026	60.6562	136.49	76.4773
MOC	M6	Shade	2	31.866	4.068	1.592	67.3273	59.9323	113	71.0714
MOC	M6	Shade	3	12.687	2.758	1.364	51.8472	44.1594	130.094	63.7383
MOC	M6	Shade	4	13.584	2.455	1.427	46.6323	40.0826	119.756	52.6568
MOC	M6	Shade	5	26.99	4.433	1.206	60.953	54.2404	125.226	62.1649
MOC	M6	Shade	6	31.331	3.896	1.588	76.1015	68.1405	133.883	83.5789
MOC	M6	Shade	7	11.827	2.64	1.467	74.3369	63.6545	180.822	121.24
MOC	M6	Shade	8	43.173	6.341	1.823	66.5018	58.1846	105.86	55.4103
MOC	M6	Shade	9	26.735	4.041	1.665	63.4734	55.3634	121.351	58.6268
MOC	M6	Shade	10	27.094	4.223	1.864	55.6002	48.2443	107.455	53.2571
MOC	M6	Shade	11	32.579	5.715	1.395	77.44	68.1997	147.674	76.2295
MOC	M6	Sun	1	19.995	4.27	1.137	61.561	54.099	156.985	64.6023
MOC	M6	Sun	2	11.237	2.62	0.836	61.7418	56.0729	229.825	119.429
MOC	M6	Sun	3	9.28	2.761	1.527	53.3333	44.7876	179.286	85.7865
MOC	M6	Sun	4	14.254	3.319	2.296	52.0409	43.6703	148.834	76.0265
MOC	M6	Sun	5	12.291	4.273	1.54	54.4814	46.3636	189.911	90.5882
MOC	M6	Sun	6	16.126	3.754	0.769	75.6734	67.4446	213.295	91.5476
MOC	M6	Sun	7	6.863	2.231	0.987	67.4165	59.7302	305.616	170.172
MOC	M6	Sun	8	9.295	2.568	1.159	60.3964	52.5438	233.455	96.5833
MOC	M6	Sun	9	12.594	2.575	1.682	49.9168	42.9097	146.307	71.2712
MOC	M6	Sun	10	12.882	3.375	1.226	52.5153	45.2476	166.256	64.1885
MOC	M6	Sun	11	18.682	3.107	1.279	68.5075	60.4791	153.812	79.9375
MOC	M7	Shade	1	20.035	4.412	0.805	54.0318	48.2655	145.132	57.9137
MOC	M7	Shade	2	11.581	2.174	0.893	56.714	50.7716	167.231	81.9266
MOC	M7	Shade	3	12.875	2.687	1.407	57.2222	50.0583	174.481	83.75
MOC	M7	Shade	4	20.64	3.588	1.258	59.4641	52.8824	139.07	72.2989
MOC	M7	Shade	5	17.958	3.41	0.954	59.6215	53.2404	148.908	72.2727
MOC	M7	Shade	6	13.834	2.577	0.921	71.3093	63.987	202.913	96.9474
MOC	M7	Shade	7	20.829	4.572	1.252	75.3582	66.5676	198.783	92.7407
MOC	M7	Shade	8	26.846	3.262	1.289	62.2877	56.4229	129.96	65.4315
MOC	M7	Shade	9	18.986	4.03	1.421	67.0646	59.0361	176.754	90.5096
MOC	M7	Shade	10	14.744	3.298	1.284	68.1016	59.935	199.879	98.7692
MOC	M7	Shade	11	23.052	3.345	1.06	78.7833	70.842	170.663	80.303
MOC	M7	Sun	1	13.352	2.754	1.055	47.771	42.8911	158.276	73.2639
MOC	M7	Sun	2	12.575	2.549	0.784	48.8919	43.6784	153.554	55.6028
MOC	M7	Sun	3	12.095	3.065	1.064	53.5651	45.9013	121.627	85.12
MOC	M7	Sun	4	13.715	3.68	0.896	50.5902	45.2342	173.585	82.2018
MOC	M7	Sun	5	19.075	4.748	1.444	46.6267	38.8098	98.5062	42.2222
MOC	M7	Sun	6	29.677	5.755	1.731	56.1108	48.5951	127.323	47.2951
MOC	M7	Sun	7	28.48	5.333	1.799	54.7166	47.0355	109.959	49.2877
MOC	M7	Sun	8	21.459	6.003	1.921	44.2545	37.6012	116.337	56.1696
MOC	M7	Sun	9	29.814	4.543	2.011	63.5151	54.7649	113.292	57.6218
MOC	M7	Sun	10	21.58	5.904	1.638	59.1557	49.6663	147.97	54.9664
MOC	M7	Sun	11	26.773	4.037	1.673	66.5995	58.0507	124.599	62.4254
MOC	M8	Shade	1	29.201	4.06	1.304	66.1255	59.1832	130.968	62.6923
MOC	M8	Shade	2	23.76	4.148	1.088	64.4601	57.754	141.57	80.5926
MOC	M8	Shade	3	17.863	2.456	1.163	60.7585	55.0817	144.471	87.4436
MOC	M8	Shade	4	22.154	4.471	1.398	58.3768	51.2943	138.421	69.5522
MOC	M8	Shade	5	20.145	4.03	1.299	50.641	44.3918	124	55.2766
MOC	M8	Shade	6	17.153	3.667	0.98	68.1215	60.7616	188.051	89.0909
MOC	M8	Shade	7	23.719	3.765	1.792	85.0143	74.2844	169.595	99.0055
MOC	M8	Shade	8	13.293	2.485	1.581	77.0609	67.4772	221.875	118.872
MOC	M8	Shade	9	25.201	3.456	2.526	74.0552	63.9295	152.92	80.7029
MOC	M8	Shade	10	24.24	2.893	1.286	78.0676	69.9971	149.124	78.4146
MOC	M8	Shade	11	23.192	3.449	1.904	91.343	80.3325	195.966	110.698
MOC	M8	Sun	1	14.199	3.851	0.925	53.0209	46.8459	157.184	85.6481
MOC	M8	Sun	2	18.286	4.133	1.028	57.3949	51.1926	167.328	73.9568
MOC	M8	Sun	3	21.643	4.405	0.819	55.7809	50.1227	176.908	43.3333
MOC	M8	Sun	4	12.669	2.663	1.329	62.6558	55.5171	208.047	100.682
MOC	M8	Sun	5	19.301	4.197	1.401	59.3329	51.7176	156.022	66.7143
MOC	M8	Sun	6	20.027	4.279	0.754	65.5119	58.9723	170.478	85.6818
MOC	M8	Sun	7	12.029	3.896	0.976	67.5028	59.0236	233.293	109.663
MOC	M8	Sun	8	11.809	2.706	1.555	60.7771	52.3449	196.087	88.8571
MOC	M8	Sun	9	15.814	3.878	1.61	61.8943	51.7982	164.322	61.4504
MOC	M8	Sun	10	23.238	4.927	0.775	65.0378	57.4629	199.474	34.5982
MOC	M8	Sun	11	29.127	4.624	1.805	63.6795	55.906	128.089	65.6364
MOC	M9	Shade	1	24.242	4.495	0.765	53.538	47.6174	101.697	63.2231
MOC	M9	Shade	2	20.197	4.418	0.844	55.5015	49.4177	135.107	69.7521
MOC	M9	Shade	3	16.007	3.387	1.973	57.5171	48.6831	119.682	88.8739
MOC	M9	Shade	4	11.56	3.432	2.212	59.1304	48.1065	159.628	94.9356
MOC	M9	Shade	5	17.069	5.938	1.055	58.6967	49.8948	153.041	84.4
MOC	M9	Shade	6	21.832	3.903	1.534	64.2307	55.9078	121.589	82.9189
MOC	M9	Shade	7	31.439	4.436	1.622	68.6291	60.2742	113.744	66.2041
MOC	M9	Shade	8	18.247	4.299	2.343	71.8386	60.241	154.64	111.043
MOC	M9	Shade	9	13.948	3.841	1.286	59.9398	51.7551	160.711	99.6899
MOC	M9	Shade	10	41.339	6.586	1.214	67.7689	59.7557	104.54	64.5745
MOC	M9	Shade	11	37.804	5.109	1.616	242.489	181.028	145.431	90.7865
MOC	M9	Sun	1	20.939	3.65	2.447	49.6538	41.4716	90.3465	57.1729
MOC	M9	Sun	2	28.808	4.091	1.584	50.9696	44.3883	78.3716	50.1266
MOC	M9	Sun	3	20.964	5.477	0.924	52.9929	45.9838	119.847	63.2877
MOC	M9	Sun	4	18.79	3.273	0.626	50.7975	45.9638	108.377	71.954
MOC	M9	Sun	5	18.87	4.031	0.814	51.9835	46.0469	115.171	68.9831
MOC	M9	Sun	6	31.182	5.262	1.046	60.3367	53.2025	101.387	60.1149
MOC	M9	Sun	7	20.258	4.831	0.839	59.182	51.3902	119.876	72.3276
MOC	M9	Sun	8	22.282	4.938	0.942	50.5146	44.3865	112.998	54.7674
MOC	M9	Sun	9	26.358	5.542	0.798	51.6925	45.5705	100.581	59.5522
MOC	M9	Sun	10	22.894	3.764	1.436	70.5299	60.9207	121.029	71.4428
MOC	M9	Sun	11	22.381	4.046	1.219	61.9286	53.5687	110.849	61.2563
MOC	M10	Shade	1	25.004	3.872	1.644	58.7224	52.4303	133.979	74.0541
MOC	M10	Shade	2	17.791	3.255	1.156	56.1585	50.4566	165.228	71.8012
MOC	M10	Shade	3	16.547	2.97	1.07	55.4524	50.4328	175.74	83.5938
MOC	M10	Shade	4	29.587	5.219	0.881	59.0088	53.9024	159.602	59.527
MOC	M10	Shade	5	17.429	2.875	1.357	58.7033	52.5128	164.286	77.5429
MOC	M10	Shade	6	29.551	5.575	1.319	70.578	63.0354	183.993	66.6162
MOC	M10	Shade	7	27.894	6.083	1.826	67.9347	59.135	178.387	67.6296
MOC	M10	Shade	8	26.346	4.798	1.245	66.3962	58.2103	149.938	52.3109
MOC	M10	Shade	9	13.7	2.594	1.033	61.5177	55.4431	160.123	125.976
MOC	M10	Shade	10	27.515	5.161	1.129	64.4832	57.5628	164.888	56.45
MOC	M10	Shade	11	17.677	3.313	1.189	69.0508	60.1054	197.202	55.8216
MOC	M10	Sun	1	19.218	3.809	0.994	59.1869	54.12	185.805	100.404
MOC	M10	Sun	2	20.166	4.649	0.75	55.5384	50.2642	184.484	58.1395
MOC	M10	Sun	3	20.366	5.226	0.906	59.049	52.7343	174.783	79.4737
MOC	M10	Sun	4	16.006	3.724	1.077	45.7314	41.2207	167.748	66.8944
MOC	M10	Sun	5	22.519	4.878	0.665	53.796	48.7424	180.667	40.5488
MOC	M10	Sun	6	28.696	4.882	0.71	61.6191	56.0469	147.048	54.1985
MOC	M10	Sun	7	15.526	3.457	1.455	58.1498	50.181	167.816	66.7431
MOC	M10	Sun	8	15.509	3.517	0.962	62.3854	54.6476	190.108	57.6048
MOC	M10	Sun	9	23.559	4.325	1.357	59.9924	52.9416	208.937	42.943
MOC	M10	Sun	10	16.069	5.453	1.122	49.1256	42.7708	216.389	47.9487
MOC	M10	Sun	11	18.355	5.645	0.89	64.8587	57.6295	253.139	67.4242
MOC	M11	Shade	1	27.206	2.018	1.1	72.997	65.3205	75.0186	65.0888
MOC	M11	Shade	2	23.464	2.434	1.378	71.1677	63.8476	114.272	83.5152
MOC	M11	Shade	3	34.753	5.302	0.929	67.0778	58.9134	95.5315	56.9939
MOC	M11	Shade	4	46.883	4.735	1.114	74.3113	66.2845	91.9417	44.739
MOC	M11	Shade	5	41.361	4.645	0.941	71.9322	63.9076	87.312	49.5263
MOC	M11	Shade	6	28.606	2.253	1.759	70.4581	62.65	92.716	66.8821
MOC	M11	Shade	7	60.137	4.347	2.028	65.3734	57.9634	63.1831	41.5574
MOC	M11	Shade	8	35.245	4.368	3.202	62.591	53.3369	96.4238	61.1069
MOC	M11	Shade	9	43.437	4.603	1.703	73.8222	65.4862	102.062	57.1477
MOC	M11	Shade	10	41.567	4.036	1.16	75.0985	66.6245	80.8818	56.5854
MOC	M11	Shade	11	46.419	4.275	1.288	83.7737	74.954	96.5011	61.6268
MOC	M11	Sun	1	16.166	3.55	1.091	64.9498	57.6123	185.864	86.5873
MOC	M11	Sun	2	32.714	4.765	1.11	58.0138	50.7745	99.6862	34.0491
MOC	M11	Sun	3	16.813	3.959	1.227	73.806	60.3049	153.45	48.6905
MOC	M11	Sun	4	16.622	3.789	1.046	62.5122	55.131	161.234	86.4463
MOC	M11	Sun	5	25.953	3.781	1.357	59.6484	53.2697	115.982	69.5897
MOC	M11	Sun	6	30.521	3.697	1.88	60.0334	53.1262	101.011	63.7288
MOC	M11	Sun	7	35.276	4.911	1.874	66.9247	58.676	118.623	57.3089
MOC	M11	Sun	8	23.516	3.729	0.759	58.4394	52.8331	123.477	60.72
MOC	M11	Sun	9	19.848	4.425	1.54	56.3383	44.5122	103.873	30.1961
MOC	M11	Sun	10	28.321	4.125	1.486	61.7823	53.9242	106.865	52.695
MOC	M11	Sun	11	26.63	3.333	1.656	60.7991	53.431	117.359	51.75
MOC	M12	Shade	1	24.023	3.796	2.03	57.6229	48.7381	103.716	51.5228
MOC	M12	Shade	2	26.455	4.956	0.57	62.571	55.9776	127.404	52.2936
MOC	M12	Shade	3	31.967	4.398	0.555	58.1535	52.1399	88.4909	40.5109
MOC	M12	Shade	4	21.02	3.824	1.286	53.7184	47.0036	111.163	59.814
MOC	M12	Shade	5	35.494	5.573	1.261	59.3049	52.1051	97.26	49.6457
MOC	M12	Shade	6	28.531	3.978	1.103	72.1026	64.1867	123.158	66.8485
MOC	M12	Shade	7	48.202	6.443	1.093	57.3219	50.975	83.5668	39.6014
MOC	M12	Shade	8	30.477	4.955	1.24	68.9993	61.1006	122.953	73.8095
MOC	M12	Shade	9	48.045	6.751	1.602	63.9151	54.9211	92.6063	31.9124
MOC	M12	Shade	10	37.663	4.803	1.115	64.1946	56.9099	103.29	38.986
MOC	M12	Shade	11	60.007	7.122	1.084	56.696	50.8405	79.5754	33.4568
MOC	M12	Sun	1	17.779	3.066	1.192	47.9606	42.2404	106.458	55.7009
MOC	M12	Sun	2	24.124	4.479	1.14	51.2078	44.7072	106.39	43.1818
MOC	M12	Sun	3	28.053	4.556	0.603	54.3979	48.8303	101.696	43.0714
MOC	M12	Sun	4	17.146	3.059	0.924	49.9592	44.5814	118.108	59.6129
MOC	M12	Sun	5	28.42	3.835	1.027	58.2974	50.1411	92.6329	27.0976
MOC	M12	Sun	6	24.65	3.789	1.252	57.3656	49.6176	110.789	38.0547
MOC	M12	Sun	7	20.813	4.501	0.499	62.2398	55.5903	148.059	51.9792
MOC	M12	Sun	8	16.426	3.872	0.898	53.6797	44.9781	111.908	36.5041
MOC	M12	Sun	9	18.96	3.575	1.208	52.9313	45.9748	125.88	46.8217
MOC	M12	Sun	10	21.174	3.84	1.827	50.0567	41.8458	100.787	40.6904
MOC	M12	Sun	11	19.399	3.026	1.145	64.2351	56.491	119.605	71.118
MOC	M13	Shade	1	24.257	4.909	1.939	59.0338	52.5498	161.48	95.5172
MOC	M13	Shade	2	22.524	4.532	2.482	56.4936	49.3406	169.104	80.0645
MOC	M13	Shade	3	20.695	3.938	2.344	53.4065	46.5579	143.723	79.1892
MOC	M13	Shade	4	22.792	4.922	0.638	52.3112	47.7419	148.701	74.186
MOC	M13	Shade	5	28.062	4.718	1.277	50.0839	45.2175	120.665	60.2358
MOC	M13	Shade	6	23.272	2.981	2.347	65.518	58.3404	143.317	102.489
MOC	M13	Shade	7	29.485	5.511	1.928	66.4526	59.2544	160.203	98.8718
MOC	M13	Shade	8	18.486	4.946	2.451	53.1512	44.5661	133.676	81.7
MOC	M13	Shade	9	24.384	4.711	2.199	58.6436	51.7927	150.994	92.395
MOC	M13	Shade	10	16.387	4.102	2.143	49.0923	40.8551	113.315	68.9068
MOC	M13	Shade	11	18.501	4.436	1.507	64.7114	57.403	202.557	103.931
MOC	M13	Sun	1	17.031	4.319	2.001	51.6247	44.6891	155.36	85.5128
MOC	M13	Sun	2	25.701	4.914	2.043	53.0355	46.6443	127.636	73.2258
MOC	M13	Sun	3	14.626	4.116	2.319	48.3504	41.2698	181.322	79.4178
MOC	M13	Sun	4	18.171	4.439	2.001	51.287	44.504	148.96	82.686
MOC	M13	Sun	5	27.375	4.772	1.7	49.1296	44.2246	117.248	80.5687
MOC	M13	Sun	6	21.832	6.168	1.701	58.0638	50.8312	182.485	86.3452
MOC	M13	Sun	7	16.117	5.14	1.085	54.1202	47.8107	188.278	90.4167
MOC	M13	Sun	8	30.844	6.467	1.249	53.9797	48.4055	134.449	70.565
MOC	M13	Sun	9	41.28	6.752	2.234	59.8955	53.3196	127.156	70.0313
MOC	M13	Sun	10	18.293	2.741	2.4	64.344	56.9166	166.121	116.505
MOC	M13	Sun	11	27.251	4.75	1.418	56.1182	50.6807	133.053	86.4634
MOC	M14	Shade	1	24.853	5.056	1.192	57.9054	51.3916	127.355	81.0884
MOC	M14	Shade	2	28.255	6.068	1.924	60.8158	51.6356	121.603	58.8379
MOC	M14	Shade	3	49.846	6.125	2.983	55.115	46.321	74.4228	33.3669
MOC	M14	Shade	4	24.633	5.366	1.405	71.4621	60.9728	139.016	67.8744
MOC	M14	Shade	5	31.804	6.35	1.061	66.689	58.356	124.023	62.7811
MOC	M14	Shade	6	26.603	6.047	1.712	73.5906	63.735	166.584	87.3469
MOC	M14	Shade	7	18.677	5.281	1.023	68.3889	59.4241	185.951	79.9219
MOC	M14	Shade	8	30.86	3.303	3.026	68.6083	57.5424	96.2974	57.9693
MOC	M14	Shade	9	20.883	4.836	1.304	72.941	61.9122	143.501	75.3757
MOC	M14	Shade	10	31.701	5.296	0.71	74.8725	66.3895	126.699	57.7236
MOC	M14	Shade	11	17.985	4.67	1.263	80.9406	70.3914	209.417	114.818
MOC	M14	Sun	1	17.561	4.735	0.748	52.7992	47.131	161.054	70.566
MOC	M14	Sun	2	24.411	3.762	1.041	55.3036	49.9202	112.299	73.8298
MOC	M14	Sun	3	13.335	2.656	1.323	48.3853	43.5927	140.529	116.053
MOC	M14	Sun	4	16.094	3.481	0.875	48.5051	42.8488	116.812	62.5
MOC	M14	Sun	5	20.583	4.331	0.998	51.1125	45.1877	124.097	55.7542
MOC	M14	Sun	6	21.956	3.795	0.785	55.9246	49.9	126.5	45.1149
MOC	M14	Sun	7	18.122	4.005	0.816	53.7107	48.3511	150	76.2617
MOC	M14	Sun	8	19.08	4.193	0.926	53.118	47.298	143.596	61.7333
MOC	M14	Sun	9	17.906	3.77	0.783	47.8898	42.613	126.936	47.1687
MOC	M14	Sun	10	13.992	3.49	0.636	62.8571	55.9233	185.638	72.2727
MOC	M14	Sun	11	16.64	4.365	0.885	59.0071	51.677	189.783	52.0588
MOC	M15	Shade	1	20.931	4.387	1.044	60.97	54.8794	164.925	90.7826
MOC	M15	Shade	2	20.525	3.734	0.925	60.0497	54.3709	150.565	84.8624
MOC	M15	Shade	3	18.678	3.576	0.618	59.8462	54.9515	170.286	90.8824
MOC	M15	Shade	4	31.154	4.85	1.267	59.2394	53.01	126.632	53.9149
MOC	M15	Shade	5	19.89	3.839	0.871	69.8876	63.5463	182.81	117.703
MOC	M15	Shade	6	36.08	4.976	1.665	59.4987	53.5629	118.759	65.8103
MOC	M15	Shade	7	18.897	3.97	1.231	77.415	64.385	181.279	44.7636
MOC	M15	Shade	8	44.421	5.634	1.142	66.0437	59.5216	106.705	54.6411
MOC	M15	Shade	9	42.6	4.813	1.325	72.2156	64.2243	98.0244	54.5267
MOC	M15	Shade	10	45.255	5.184	1.25	65.7394	59.4444	107.775	50.4032
MOC	M15	Shade	11	38.24	4.464	1.186	61.1546	55.4846	108.613	52.0175
MOC	M15	Sun	1	15.75	3.426	0.979	49.3112	44.2291	148.957	71.4599
MOC	M15	Sun	2	33.196	3.749	0.599	48.4825	44.7265	86.3825	42.4823
MOC	M15	Sun	3	19.685	4.133	1.514	45.0355	39.5361	125.623	54.2652
MOC	M15	Sun	4	11.793	3.833	1.053	47.3045	39.9627	162.415	47.4324
MOC	M15	Sun	5	16.675	3.516	0.83	45.7727	41.7815	154.89	68.595
MOC	M15	Sun	6	23.467	4.66	1.311	50.4125	44.5632	120.413	58.5268
MOC	M15	Sun	7	34.339	4.559	1.469	49.3802	44.4288	95.7773	49.1304
MOC	M15	Sun	8	19.786	4.075	1.298	49.0724	43.5815	139.555	60.0926
MOC	M15	Sun	9	28.066	4.034	1.069	50.8719	46.1005	108.15	53.9899
MOC	M15	Sun	10	24.298	4.091	0.777	50.8752	46.5123	129.054	59.313
MOC	M15	Sun	11	22.141	4.282	1.213	51.6348	45.2319	119.276	48.9113
MOC	M16	Shade	1	14.806	2.69	1.203	72.2244	63.4634	167.081	98.6066
MOC	M16	Shade	2	20.554	4.467	1.206	64.5946	55.6868	132.946	69.711
MOC	M16	Shade	3	13.049	3.123	1.611	62.4354	50.5971	138.8	61.0227
MOC	M16	Shade	4	22.772	4.544	0.615	69.5966	61.4629	180.317	33.9779
MOC	M16	Shade	5	25.102	4.83	0.872	65.7982	56.2699	136.441	29.863
MOC	M16	Shade	6	13.406	2.661	1.273	78.5815	67.9129	176.225	108.803
MOC	M16	Shade	7	17.525	3.292	1.287	64.8114	56.0262	153.116	61.5789
MOC	M16	Shade	8	18.897	2.807	2.553	58.5772	48.3299	107.548	60.3546
MOC	M16	Shade	9	17.852	2.658	0.634	73.104	66.0696	210.952	47.3134
MOC	M16	Shade	10	12.519	2.641	1.948	66.3434	52.6451	128.204	68.3509
MOC	M16	Shade	11	20.094	3.042	1.552	71.7131	62.1913	128.898	80.4145
MOC	M16	Sun	1	21.752	4.325	2.681	47.0009	39.2565	106.005	53.0891
MOC	M16	Sun	2	13.546	3.135	1.551	43.6124	36.89	109.615	55.3929
MOC	M16	Sun	3	33.077	6.678	2.604	47.9377	38.7636	86.7273	30.1738
MOC	M16	Sun	4	13.839	2.552	1.097	48.7632	42.6603	122.105	55.6853
MOC	M16	Sun	5	18.26	3.355	1.782	59.4595	52.2013	143.376	92.3316
MOC	M16	Sun	6	20.376	5.146	1.663	65.016	54.2926	137.962	67.6016
MOC	M16	Sun	7	15.403	3.178	1.364	65.4611	57.906	163.814	120.708
MOC	M16	Sun	8	18.209	3.781	2.583	52.7491	44.143	138.498	64.575
MOC	M16	Sun	9	21.583	4.615	1.784	55.8277	47.9516	134.548	61.0959
MOC	M16	Sun	10	22.73	3.625	2.42	52.6889	44.0248	107.249	47.3581
MOC	M16	Sun	11	31.025	5.721	3.841	57.1258	42.1937	113.512	27.0874
MOC	M17	Shade	1	27.406	3.473	1.43	63.6461	55.4777	89.7416	57.8947
MOC	M17	Shade	2	13.897	2.121	1.387	63.1395	53.2248	123.314	58.2773
MOC	M17	Shade	3	18.369	3.4	1.685	67.5828	56.9405	121.429	73.9035
MOC	M17	Shade	4	28.83	5.541	2.179	64.2666	53.5078	115.438	51.6351
MOC	M17	Shade	5	20.674	3.289	0.978	64.7479	56.0879	111.115	49.6447
MOC	M17	Shade	6	24.071	3.447	1.304	75.6236	65.9841	113.762	80.4938
MOC	M17	Shade	7	30.929	5.285	1.409	67.3541	57.6066	107.201	49.6127
MOC	M17	Shade	8	17.924	2.259	1.009	74.5281	66.1402	103.151	117.326
MOC	M17	Shade	9	13.686	2.948	1.187	69.3313	59.3495	150.408	87.2794
MOC	M17	Shade	10	25.054	3.92	1.261	64.2081	54.7748	99.7455	45.1971
MOC	M17	Shade	11	21.124	3.438	1.467	72.4666	62.2943	125.474	72.6238
MOC	M17	Sun	1	18.808	3.345	0.756	66.2954	59.0889	141.737	68.7273
MOC	M17	Sun	2	20.545	3.315	1.659	65.0158	55.3326	121.875	59.0391
MOC	M17	Sun	3	27.081	3.351	1.743	66.4564	57.0968	97.4128	53.7963
MOC	M17	Sun	4	27.389	4.912	2.129	62.4464	51.8142	110.135	46.8943
MOC	M17	Sun	5	20.781	3.303	1.437	67.9118	59.222	133.725	71.1386
MOC	M17	Sun	6	21.738	3.406	1.216	69.7625	61.4241	140.744	67.1823
MOC	M17	Sun	7	19.216	4.351	1.094	72.1863	62.4911	165.437	72.9333
MOC	M17	Sun	8	25.409	5.471	1.33	76.6717	54.6665	51.7108	48.1884
MOC	M17	Sun	9	17.922	3.973	1.105	75.0817	65.5283	169.064	97.7876
MOC	M17	Sun	10	20.714	3.688	1.695	69.185	57.9575	130.318	57.0707
MOC	M17	Sun	11	20.989	3.282	1.562	65.0015	56.1203	120.22	65.6303
MOC	M18	Shade	1	25.368	5.299	1.636	71.9455	61.8883	149.689	74.7032
MOC	M18	Shade	2	18.986	3.569	1.087	74.0195	65.6501	164.47	98.8182
MOC	M18	Shade	3	38.38	6.213	1.415	70.8641	61.3785	118.118	45.4984
MOC	M18	Shade	4	22.551	4.568	1.017	73.5039	65.4411	182.72	79.4531
MOC	M18	Shade	5	32.838	4.892	0.719	82.8197	74.093	144.307	56.1719
MOC	M18	Shade	6	20.669	4.407	0.419	83.2085	74.8606	194.141	83.8
MOC	M18	Shade	7	21.754	4.97	1.26	82.1836	70.6069	194.902	70.3911
MOC	M18	Shade	8	21.402	5.063	1.721	65.3097	53.8551	138.333	51.994
MOC	M18	Shade	9	15.16	4.407	0.783	81.4178	71.442	226	120.462
MOC	M18	Shade	10	27.686	4.643	1.434	67.7416	58.6816	136.158	49.4483
MOC	M18	Shade	11	14.233	4.075	0.756	75.2671	65.8021	212.24	94.5
MOC	M18	Sun	1	20.126	4.746	1.613	65.7712	54.616	183.953	43.951
MOC	M18	Sun	2	23.06	4.976	1.139	68.0035	59.1282	163.684	55.561
MOC	M18	Sun	3	14.749	3.308	1.266	70.401	59.3521	195.74	57.2851
MOC	M18	Sun	4	20.087	4.676	1.016	59.8362	50.0798	135.145	32.987
MOC	M18	Sun	5	24.734	4.856	1.068	63.3555	54.9156	141.163	41.7188
MOC	M18	Sun	6	26.22	5.081	1.242	68.4774	58.8288	143.938	45.1636
MOC	M18	Sun	7	24.626	5.092	1.122	71.4004	61.0612	148.889	46.3636
MOC	M18	Sun	8	28.525	5.55	1.079	78.4732	68.6192	167.674	56.4921
MOC	M18	Sun	9	21.25	5.482	1.03	76.4939	65.3846	167.645	71.0345
MOC	M18	Sun	10	30.809	5.988	2.083	65.5511	54.2316	139.907	37.6673
MOC	M18	Sun	11	35.208	6.206	1.899	83.9085	71.3724	169.101	51.3243
MOC	M19	Shade	1	15.667	4.53	1.144	63.6094	52.9112	134.421	71.0559
MOC	M19	Shade	2	16.034	4.214	1.397	60.03	49.9969	143.333	57.7273
MOC	M19	Shade	3	19.106	4.909	1.797	55.4923	45.4148	113.898	53.964
MOC	M19	Shade	4	16.955	4.062	1.308	57.788	48.6235	124.22	57.8761
MOC	M19	Shade	5	14.418	3.891	1.032	59.2115	50.1147	133.711	68.3444
MOC	M19	Shade	6	16.195	4.068	1.37	58.1717	48.839	127.125	64.6226
MOC	M19	Shade	7	15.833	3.872	0.939	58.8806	50.2316	119.138	68.0435
MOC	M19	Shade	8	10.34	3.461	1.007	54.3924	46.0169	159.493	78.062
MOC	M19	Shade	9	18.183	3.396	0.79	62.7	55.2843	124.853	67.5214
MOC	M19	Shade	10	17.53	4.153	1.353	67.3195	57.5509	141.741	90.8054
MOC	M19	Shade	11	21.265	4.609	1.303	63.1009	54.8067	135.161	77.1006
MOC	M19	Sun	1	17.91	3.14	2.51	45.0226	37.2659	94.2943	50.7071
MOC	M19	Sun	2	40.928	5.816	1.381	43.4988	37.6315	64.4789	24.4425
MOC	M19	Sun	3	13.509	2.895	1.172	45.2866	38.9758	121.639	47.8367
MOC	M19	Sun	4	22.311	3.809	1.092	55.694	47.7956	88.3759	47.2727
MOC	M19	Sun	5	15.351	3.558	0.77	59.1789	50.1503	116.275	47.8261
MOC	M19	Sun	6	15.961	3.89	1.509	61.3413	50.9773	128.808	66.4758
MOC	M19	Sun	7	17.878	4.334	1.863	57.4301	48.0591	123.125	73.0588
[truncated: 466 more rows]
