# Supplementary material for: Climatic factors shaping intraspecific leaf trait variation of a neotropical tree along a rainfall gradient
Source: PLoS One. 2018 Dec 6;13(12):e0208512. doi: 10.1371/journal.pone.0208512 (PMC6283565; doi:10.1371/journal.pone.0208512)
Supplement: S2 Table — (XLSX) [file pone.0208512.s002.xlsx]

## Sheet: Phisiological traits
S2 Table: Data set of physiological traits of metamers in Copaifera langsdorffii.
Populations	Individuals	Light conditions	Leaves	ETRmax	PPFDsat	Fv/Fm
LAV	L1	Shade	1	24.06	215.154	0.755
LAV	L1	Shade	2	26.76	208.522	0.742
LAV	L1	Shade	3	32.29	264.794	0.767
LAV	L1	Sun	1	21.92	290.367	0.651
LAV	L1	Sun	2	23.75	227.498	0.728
LAV	L1	Sun	3	20.09	291.693	0.683
LAV	L2	Shade	1	42.88	285.148	0.773
LAV	L2	Shade	2	37.79	265.62	0.782
LAV	L2	Shade	3	47.37	330.555	0.797
LAV	L2	Sun	1	29.37	350.824	0.736
LAV	L2	Sun	2	28.43	413.967	0.746
LAV	L2	Sun	3	27.5	283.251	0.646
LAV	L3	Shade	1	35.67	274.955	0.755
LAV	L3	Shade	2	43.59	388.908	0.75
LAV	L3	Shade	3	32.86	245.832	0.747
LAV	L3	Sun	1	31.35	478.469	0.754
LAV	L3	Sun	2	35.42	515.695	0.719
LAV	L3	Sun	3	26.42	380.04	0.685
CAG	C1	Shade	1	107.9	828.232	0.755
CAG	C1	Shade	2	127	1031.39	0.784
CAG	C1	Shade	3	83.73	775.978	0.763
CAG	C1	Sun	1	70.89	398.475	0.716
CAG	C1	Sun	2	107.9	763.106	0.721
CAG	C1	Sun	3	79.18	570.295	0.712
CAG	C2	Shade	1	78.01	539.653	0.789
CAG	C2	Shade	2	108.6	645.342	0.765
CAG	C2	Shade	3	78.32	619.445	0.773
CAG	C2	Sun	1	44.87	359.768	0.661
CAG	C2	Sun	2	38.66	594.469	0.687
CAG	C2	Sun	3	92.64	795.572	0.743
CAG	C3	Shade	1	70.43	538.768	0.798
CAG	C3	Shade	2	70.48	512.364	0.785
CAG	C3	Shade	3	67.73	518.485	0.784
CAG	C3	Sun	1	56.99	831.826	0.615
CAG	C3	Sun	2	53.02	595.084	0.744
CAG	C3	Sun	3	42.71	639.244	0.687
BHZ	BH1	Shade	1	78.76	551.03	0.756
BHZ	BH1	Shade	2	60.89	421.554	0.735
BHZ	BH1	Shade	3	62.14	434.044	0.738
BHZ	BH1	Sun	1	51.76	358.032	0.764
BHZ	BH1	Sun	2	56.17	424.354	0.731
BHZ	BH1	Sun	3	29.15	265.773	0.737
BHZ	BH2	Shade	1	78.7	668.799	0.768
BHZ	BH2	Shade	2	52.01	508.063	0.766
BHZ	BH2	Shade	3	55.02	561.935	0.745
BHZ	BH2	Sun	1	24.18	441.374	0.76
BHZ	BH2	Sun	2	46.58	581.395	0.75
BHZ	BH2	Sun	3	50.82	661.49	0.72
BHZ	BH3	Shade	1	65.68	697.816	0.774
BHZ	BH3	Shade	2	54.43	575.144	0.768
BHZ	BH3	Shade	3	82.83	762.852	0.789
BHZ	BH3	Sun	1	59.96	398.475	0.711
BHZ	BH3	Sun	2	41.65	275.284	0.638
BHZ	BH3	Sun	3	55.21	416.742	0.669
PAP	P1	Shade	1	61.66	548.01	0.781
PAP	P1	Shade	2	33.51	405.572	0.747
PAP	P1	Shade	3	82.18	554.885	0.748
PAP	P1	Sun	1	32.65	446.342	0.715
PAP	P1	Sun	2	74.68	783.379	0.693
PAP	P1	Sun	3	50.18	590.501	0.728
PAP	P2	Shade	1	83.01	685.544	0.768
PAP	P2	Shade	2	67.51	579.929	0.79
PAP	P2	Shade	3	57.9	566.084	0.779
PAP	P2	Sun	1	51.03	359.094	0.624
PAP	P2	Sun	2	45.035	379.538	0.692
PAP	P2	Sun	3	39.16	290.514	0.687
PAP	P3	Shade	1	72.335	558.389	0.802
PAP	P3	Shade	2	50.51	296.381	0.797
PAP	P3	Shade	3	70.04	428.245	0.782
PAP	P3	Sun	1	29.43	395.461	0.742
PAP	P3	Sun	2	49.08	512.249	0.649
PAP	P3	Sun	3	34.43	403.721	0.703
MOC	M1	Shade	1	55.19	673.105	0.773
MOC	M1	Shade	2	45.85	446.602	0.764
MOC	M1	Shade	3	62.77	740.264	0.776
MOC	M1	Sun	1	62.27	592.173	0.676
MOC	M1	Sun	2	77.58	607.662	0.505
MOC	M1	Sun	3	46.58	390.957	0.66
MOC	M2	Shade	1	11.05	793.651	0.764
MOC	M2	Shade	2	9.071	375.02	0.772
MOC	M2	Shade	3	12.65	863.363	0.773
MOC	M2	Sun	1	73.37	649.901	0.719
MOC	M2	Sun	2	78.06	646.794	0.556
MOC	M2	Sun	3	73.49	985.855	0.754
MOC	M3	Shade	1	24.64	286.962	0.786
MOC	M3	Shade	2	14.12	373.316	0.746
MOC	M3	Shade	3	19.6	427.907	0.795
MOC	M3	Sun	1	46.67	499.566	0.678
MOC	M3	Sun	2	33.5	768.974	0.611
MOC	M3	Sun	3	57.14	626.362	0.627
JAP	J1	Shade	1	102.2	709.877	0.723
JAP	J1	Shade	2	76.23	893.898	0.741
JAP	J1	Shade	3	100	680.473	0.743
JAP	J1	Sun	1	46.67	760.582	0.755
JAP	J1	Sun	2	33.5	688.211	0.76
JAP	J1	Sun	3	18.26	767.178	0.753
JAP	J2	Shade	1	75.69	593.548	0.749
JAP	J2	Shade	2	83.11	653.595	0.749
JAP	J2	Shade	3	77.29	675.874	0.769
JAP	J2	Sun	1	25.87	823.487	0.57
JAP	J2	Sun	2	26.14	1372.32	0.538
JAP	J2	Sun	3	17.12	388.842	0.664
JAP	J3	Shade	1	55.24	716.511	0.774
JAP	J3	Shade	2	51.21	518.251	0.773
JAP	J3	Shade	3	53.66	617.381	0.751
JAP	J3	Sun	1	48.93	552.354	0.619
JAP	J3	Sun	2	37.05	727.848	0.515
JAP	J3	Sun	3	38.42	526.436	0.576
